# Supplementary material for: Oral Janus kinase inhibitors and venous thromboembolic events in atopic dermatitis: protocols for a case–time control study and a nested case-control study based on the French national health insurance (SNDS) cohort
Source: PubMed Central journal article supplement — BMJ Open. 2022 Sep 21;12(9):e059979. doi: 10.1136/bmjopen-2021-059979 (PMC9494565; doi:10.1136/bmjopen-2021-059979), 2022-09-21
Supplement: bmjopen-2021-059979.draft_revisions.pdf [file bmjopen-2021-059979.draft_revisions.pdf]

# BMJ Open

BMJ Open is committed to open peer review. As part of this commitment we make the peer review history of every article we publish publicly available.

When an article is published we post the peer reviewers' comments and the authors' responses online. We also post the versions of the paper that were used during peer review. These are the versions that the peer review comments apply to.

The versions of the paper that follow are the versions that were submitted during the peer review process. They are not the versions of record or the final published versions. They should not be cited or distributed as the published version of this manuscript.

BMJ Open is an open access journal and the full, final, typeset and author-corrected version of record of the manuscript is available on our site with no access controls, subscription charges or pay-per-view fees (<http://bmjopen.bmj.com>).

If you have any questions on BMJ Open's open peer review process please email [info.bmjopen@bmj.com](mailto:info.bmjopen@bmj.com)

# BMJ Open

## Oral Janus kinase inhibitors and venous thromboembolic events in atopic dermatitis: protocols for a case-time control study and a nested case-control study based on the French national health insurance (SNDS) cohort.

|                               |                                                                                                                                                                                                                                                                                                                                                                                                                                                                                                                                                                                                           |
|-------------------------------|-----------------------------------------------------------------------------------------------------------------------------------------------------------------------------------------------------------------------------------------------------------------------------------------------------------------------------------------------------------------------------------------------------------------------------------------------------------------------------------------------------------------------------------------------------------------------------------------------------------|
| Journal:                      | <i>BMJ Open</i>                                                                                                                                                                                                                                                                                                                                                                                                                                                                                                                                                                                           |
| Manuscript ID                 | bmjopen-2021-059979                                                                                                                                                                                                                                                                                                                                                                                                                                                                                                                                                                                       |
| Article Type:                 | Protocol                                                                                                                                                                                                                                                                                                                                                                                                                                                                                                                                                                                                  |
| Date Submitted by the Author: | 11-Dec-2021                                                                                                                                                                                                                                                                                                                                                                                                                                                                                                                                                                                               |
| Complete List of Authors:     | BERTHE, Pauline; CHU Rennes, Scailteux, Lucie-Marie ; CHU Rennes, Pharmacovigilance and Pharmacoepidemiology<br>Lescoat, Alain; CHU Rennes, Internal Medicine & Clinical Immunology<br>STAUMONT, DELPHINE; CHU Lille, Department of Dermatology<br>Coiffier, Guillaume; CH Dinan,<br>Guéret, Pierre; CHU Rennes<br>Dupuy, Alain; Dermatology, Rennes Hospital, Rennes, France<br>Oger, Emmanuel; CHU Rennes<br>Droitcourt, Catherine; Centre Hospitalier Universitaire de Rennes, Department of Dermatology; Université de Rennes 1, EA 7449 REPERES<br>Pharmacoepidemiology and Health Services Research |
| Keywords:                     | Adult dermatology < DERMATOLOGY, Eczema < DERMATOLOGY, Thromboembolism < CARDIOLOGY, Risk management < HEALTH SERVICES ADMINISTRATION & MANAGEMENT, CLINICAL PHARMACOLOGY                                                                                                                                                                                                                                                                                                                                                                                                                                 |
|                               |                                                                                                                                                                                                                                                                                                                                                                                                                                                                                                                                                                                                           |

SCHOLARONE™  
Manuscripts

**Title:** Oral Janus kinase inhibitors and venous thromboembolic events in atopic dermatitis: protocols for a case-time control study and a nested case-control study based on the French national health insurance (SNDS) cohort.

**Authors:** Pauline Berthe<sup>1</sup>, MD; Lucie-Marie Scailteux<sup>2,3</sup>, PharmD, PhD; Alain Lescoat<sup>4,5</sup>, MD, PhD; Delphine Staumont-Sallé<sup>6,7</sup>, MD, PhD; Guillaume Coiffier<sup>8,9</sup>, MD; Pierre Guéret<sup>10</sup>, MD, PhD; Alain Dupuy<sup>1,2</sup>, MD, PhD; Emmanuel Oger<sup>2,3</sup>, MD, PhD; Catherine Droitcourt<sup>1,2</sup> MD, PhD.

<sup>1</sup>Department of Dermatology, CHU Rennes, F-35000 Rennes, France

<sup>2</sup>University of Rennes, EA 7449 REPERES “Pharmacoepidemiology and Health Services Research”, F-35000 Rennes, France

<sup>3</sup>Pharmacovigilance, Pharmacoepidemiology and Drug Information Centre, Department of Clinical Pharmacology, Rennes University Hospital, F-35000 Rennes, France

<sup>4</sup>Department of Internal Medicine and Clinical Immunology, CHU Rennes, F-35000 Rennes, France

<sup>5</sup>University of Rennes, CHU Rennes, Inserm, EHESP, Irset (Institut de recherche en santé, environnement et travail) - UMR\_S 1085, F-35000Rennes, France

<sup>6</sup>Department of Dermatology, CHU Lille, F-59000 Lille, France

<sup>7</sup>University of Lille, U1286 Inserm INFINITE (Institute for Translational Research in Inflammation), F-59000 Lille, France

<sup>8</sup>Department of Rheumatology, CH Dinan, F-22100 Dinan, France

<sup>9</sup>Department of Rheumatology, CHU Rennes, INSERM, INRA, Institut NUMECAN (Nutrition Metabolism and Cancer), F-35000Rennes, France

<sup>10</sup>Haemostasis Department, CHU Rennes, F-35000 Rennes, France

**Corresponding author:** Dr Pauline BERTHE, Department of Dermatology, Pontchaillou Hospital, 2 rue Henri le Guilloux, F-35000 Rennes, France, Tel: + 33-299-284-349, Fax: + 33-299-284-100, E-mail: pauline.berthe@chu-rennes.fr

Manuscript word count: 4243/4000

Abstract word count: 300/300

References: 79

1  
2  
3 Figures: 3  
4

5 Tables: 3  
6

7 Supplementary materials: 2  
8

9 **Attachments:** ENCePP checklist for study protocols  
10

11 **Funding sources:** This research did not receive any specific funding from agencies or  
12 organizations in the public, commercial, or not-for-profit sectors.  
13

14 **Conflicts of Interest:** None with regard to the present work.  
15

16 **Keywords:** JAK inhibitor, venous thromboembolic event, health insurance database  
17  
18  
19  
20  
21  
22  
23  
24  
25  
26  
27  
28  
29  
30  
31  
32  
33  
34  
35  
36  
37  
38  
39  
40  
41  
42  
43  
44  
45  
46  
47  
48  
49  
50  
51  
52  
53  
54  
55  
56  
57  
58  
59  
60

**Abbreviations**

Ankylosing spondylitis (AS)

Atopic dermatitis (AD)

Anatomical Therapeutic Chemical (ATC)

Confidence interval (CI)

Crohn's disease (CD)

European Medicines Agency (EMA)

Incidence rate (IR)

International Classification of Diseases, 10th Revision (ICD-10)

Odds ratio (OR)

Psoriatic arthritis (PsA)

Rheumatoid arthritis (RA)

Signal transducer and activator of transcription (STAT)

Système National des Données de Santé (SNDS)

Ulcerative colitis (UC)

Venous thromboembolic event (VTE)

## Abstract

### *Introduction:*

Atopic dermatitis (AD) is a highly prevalent, chronic, inflammatory skin disease. Recent advances in understanding its pathogenesis have greatly expanded the therapeutic armamentarium. Several orally administered Janus kinase inhibitors (JAKis, including baricitinib, upadacitinib and abrocitinib) have received a marketing authorization for AD.

Clinical trials in rheumatoid arthritis (RA) have flagged up a potential risk of JAKi-induced venous thromboembolic events (VTEs). Accordingly, the summary of product characteristics for a JAKi must mention VTEs as potential adverse drug reactions. In contrast to RA, AD per se is not associated with an elevated risk of VTEs. Assessing this potential risk among AD patients would shed further light on the putative underlying relationship between JAKis and VTEs.

### *Methods and analysis:*

Our objective is to investigate the association between JAKis prescribed for AD and VTEs. We will address the following two questions: (i) is the risk of VTEs higher in adults with AD exposed to JAKis than in AD adults not exposed to JAKis, and (ii) does the initiation of treatment with a JAKi trigger VTEs? Hence, we have designed (i) a nested case-control study and (ii) a case-time-control study in a cohort of adults with AD with data from the French national health insurance system (2017-2025).

Here, we describe the study protocol, our methodological choices, and certain novel aspects - including the combined value of the two assumptions, and the use of an exhaustive national health insurance database with potentially greater statistical power for studying rare events in the population of AD patients at a low risk of VTEs (thus limiting the influence of confounding factors).

### *Ethics and dissemination:*

The protocol has been approved by an independent ethics committee and registered with the French National Data Protection Commission. The study's findings will be published in peer-reviewed scientific journals and presented at international conferences.

### Article Summary: strengths and limitations of this study

A population-based study using the exhaustive French national health insurance database would provide additional insight into the risk of venous thromboembolic events (VTEs). Advantageously, this nationwide study should be able to exhaustively identify VTEs, the time of their occurrence, and prescriptions of JAK inhibitors.

By studying atopic dermatitis (AD), we hope to avoid a major source of confounding bias; in contrast to rheumatoid arthritis, AD is not associated *per se* with an elevated risk of VTEs.

The limitations of this study protocol (based on the use of French national health insurance database) include a lack of data on certain risk factors for VTEs (including obesity and a family history of thromboembolic disease) and a potential lack of statistical power.

## INTRODUCTION

Atopic dermatitis (AD) is a highly prevalent, pruritic, inflammatory disease skin that occurs in both adults (3 to 10%) (1–3) and children (15 to 20%) (1,4,5). Approximately 2 to 8% of adults with AD have severe forms; the associated impairments in quality of life make AD a disabling disease. Severe AD is frequently associated with other atopic comorbidities (e.g. asthma, allergic rhinitis, allergic conjunctivitis, and food allergy), and may be associated with psychiatric disorders.

The European guidelines on the management of AD in adults recommend first-line treatment with topical anti-inflammatory drugs (topical corticosteroids and tacrolimus) and then (if the treatment fails) systemic immunosuppressants (6,7). In late 2017, the management of treatment-refractory AD was revolutionized by the marketing of the first biologic drug, dupilumab (a subcutaneously administered monoclonal antibody against the interleukin -4 and -13 receptors) (8,9). Other systemic treatments have since received (or are awaiting) marketing authorization: baricitinib (an orally administered Janus kinase (Jak) 1 and 2 inhibitor (JAKi) (10–13), upadacitinib (an orally administered JAK1 inhibitor) (14–16), abrocitinib (another orally administered JAK1 inhibitor) (17–19), and tralokinumab (a subcutaneously administered anti-interleukin-13 monoclonal antibody) (20,21).

JAKis constitute a new family of orally administered molecules that target the JAK-signal transducer and activator of transcription (STAT) pathway. Janus kinases are involved in the transduction of intracellular signals in response to various cytokines and growth factors involved in haematopoiesis, inflammation, and immune functions.

In the European Union, baricitinib was approved for the treatment of active, moderate-to-severe rheumatoid arthritis (RA) in adults in 2017 and for moderate-to-severe AD in adults who are candidates for systemic drug treatment in 2021. Upadacitinib was approved for the treatment of adults with moderate-to-severe active RA, psoriatic arthritis (PsA), or ankylosing spondylitis (AS) in 2020 and 2021 and for the treatment of moderate-to-severe AD in adults and adolescents (aged 12 or over) who are candidates for systemic drug treatment in August 2021. Lastly, abrocitinib was approved very recently by the European Medicines Agency (EMA) for the systemic treatment of moderate-to-severe AD in adults and adolescents.

Clinical trials in RA have flagged up a potential risk of JAKi-induced venous thromboembolic events (VTEs, including deep vein thrombosis and pulmonary embolism) (22–26). Although the EMA approved low (2 mg) and high (4 mg) doses of baricitinib, the FDA only approved the 2 mg dose because of the VTE risk. On a broader scale, the summary of product



1  
2  
3 characteristics for a JAKi must mention VTEs as potential adverse drug reactions. The safety  
4 profiles of baricitinib and upadacitinib in patients with RA have been described in nine and five  
5 clinical studies, respectively. The estimated incidence of VTEs ranged from 0.3 to 0.6 per 100  
6 person-years (22,27).  
7  
8  
9

10 Due to the presence of systemic inflammation, RA *per se* can induce thromboembolic events,  
11 and the treatment of RA with anti-inflammatory drugs helps to reduce the cardiovascular and  
12 thromboembolic risk (25,28). Furthermore, most patients with RA are aged over 50 at diagnosis  
13 and have higher prevalence of obesity and a higher incidence of VTEs. In this case, the interplay  
14 between RA, JAKis and thromboembolic risk is particularly difficult to characterize.  
15  
16  
17  
18

19 The pathogenic links between JAKis and a potentially greater risk of thromboembolic disease  
20 are poorly understood, and the literature data are contradictory. The potential thromboembolic  
21 risk might be related to an imbalance between pro and anti-thrombotic signals, including the  
22 inhibition of pro-inflammatory signals (such as interferon-dependant pathways) and the  
23 paradoxical inhibition of JAK-STAT-dependant anti-inflammatory pathways (such as the IL-  
24 10 pathway that helps to limit clot formation under normal conditions) (29,30). JAKis that  
25 influence JAK2-dependent signalling (such as baricitinib) might also promote platelet  
26 formation from megakaryocytes, as evidenced by a transient increase in the platelet count  
27 following JAKi initiation. Nonetheless, a causal link between transient thrombocytosis and  
28 VTE has never been proven (22).  
29  
30  
31  
32  
33  
34  
35  
36

37 The results of meta-analyses of the links between JAKis and the risk of thromboembolic and/or  
38 cardiovascular events are summarized in Table 1. Most of the meta-analyzed data came from  
39 clinical trials, rather than real-life studies with a longer follow-up period. The meta-analyses  
40 concluded that although the JAKi treatment is associated with an elevated risk of VTEs, the  
41 association is not statistically significance. Lastly, the meta-analyses did not encompass data  
42 on VTEs treated in primary care facilities (i.e. on an outpatient basis). Two analyses of US  
43 medical-administrative databases did not find a difference in the VTE risk between patients  
44 with RA taking tofacitinib and those taking an anti-tumour necrosis factor agent (hazard ratio  
45 [95% confidence interval (CI)] = 1.13 [0.77-1.65] and 1.33 [0.78-2.24], respectively) (31,32).  
46 However, the researchers could not rule out such a risk, and only considered VTEs leading to  
47 hospital admission (31,32).  
48  
49  
50  
51  
52  
53  
54  
55

56 A population-based study of a health insurance database (the *Système National des Données de*  
57 *Santé*, SNDS) would provide additional insights by focusing on the VTE risk. The advantages  
58 of studying a health insurance database include the precise, national-level identification of JAKi  
59  
60

1  
2  
3 prescriptions, VTEs, and the time of occurrence (relative to treatment initiation, for example).  
4 Furthermore, studying AD avoids a major source of confounding bias; in contrast to RA and  
5 inflammatory bowel disease, AD is not associated with an increased risk of VTE (33) and  
6 predominantly affects a younger population with a lower prevalence of concomitant  
7 cardiovascular comorbidities or obesity.  
8  
9

10  
11 Here, we describe the protocol for the “JAK inhibitors and ThromboEmbolic Risk” (JAKTER)  
12 study of the association between JAKis and VTEs in AD, using real-world evidence from an  
13 exhaustive French medical-administrative database. We also discuss our methodological  
14 choices. We will address the following two questions, using two different methodological  
15 approaches: (i) is the risk of VTEs higher in adults with AD exposed to JAKis than in adults  
16 with AD not exposed to JAKis, and (ii) does the initiation of treatment with a JAKi trigger  
17 VTEs?  
18  
19  
20  
21  
22  
23  
24  
25

## 26 **METHODS AND ANALYSIS**

### 27 **Overall study design**

28  
29 The literature data on the temporal relationship between the initiation of treatment with a JAKi  
30 and the occurrence of a VTE are contradictory. Some studies suggest that the incidence rates of  
31 VTEs are consistent over time (22), whereas other indicate that the incidence rates are clustered  
32 soon after the start of exposure (34). We will therefore use two different methodological  
33 approaches to investigate the VTEs and the JAKis prescribed for AD: (i) a nested case-control  
34 study in a cohort of adults with AD (analysis #1) and (ii) a case-time-control study (analysis  
35 #2).  
36  
37  
38  
39  
40  
41

42 The overall study design is summarized in Figure 1.  
43  
44  
45

### 46 **Place and study time**

47 The analysis period will run from January 1<sup>st</sup>, 2017, to August 31<sup>st</sup>, 2025, in France.  
48  
49  
50  
51

### 52 **Data sources**

53 We will analyze the French national health insurance database (*Système National des Données*  
54 *de Santé*, SNDS), which covers 98% of the 66 million people in France. The SNDS database  
55 contains anonymous data on individuals' demographic characteristics (sex, dates of birth, and  
56 (of applicable) date of death); all healthcare reimbursements, including drugs (with the  
57  
58  
59  
60

1  
2  
3 prescription filling date, the prescriber's medical speciality, laboratory tests, outpatient  
4 care/visits, all hospital stays, and the associated diagnoses (coded according to the International  
5 Classification of Diseases, 10<sup>th</sup> Revision (ICD-10), all causes of death (classified according to  
6 the ICD-10 codes), and the attribution or not of "chronic disease" status ("*affection de longue*  
7 *durée*" (ALD), giving entitlement to the full coverage of related healthcare costs, and again  
8 coded according to ICD-10 codes).  
9  
10  
11  
12  
13  
14

### 15 **Selection criteria and constitution of the target cohort**

16  
17 To avoid indication bias and form a homogeneous group of patients in terms of medical care,  
18 we will build up a cohort of adults with AD and who start systemic immunomodulatory  
19 treatment for this disease.  
20  
21  
22

23 In France, AD is a chronic condition that is mostly managed in outpatient settings and not  
24 during hospital stays. Furthermore, AD does not give entitlement to ALD chronic disease status.  
25 All eligible adults (aged 18 or over) with *a priori* AD will be identified as follows:  
26  
27

- 28 - adults (aged 18 or over) with an initial fulfilment of a prescription for dupilumab,  
29 cyclosporine, methotrexate, tralokinumab, or a JAKi (baricitinib, upadacitinib, or  
30 abrocitinib), two or more fulfilments of topical corticosteroids, and a consultation with  
31 a dermatologist between January 1<sup>st</sup>, 2017, and December 31<sup>st</sup>, 2024.
- 32 - adults with no fulfilments of dupilumab, cyclosporine, methotrexate, tralokinumab or  
33 JAKi (baricitinib, upadacitinib, or abrocitinib) prescriptions in the year prior to cohort  
34 entry.  
35
- 36 - adults with no other indications for dupilumab, cyclosporine, methotrexate,  
37 tralokinumab, or the JAKis baricitinib, upadacitinib, or abrocitinib (i.e. RA, PsA, AS,  
38 ulcerative colitis, lupus, organ or bone marrow transplant, nephrotic syndrome, and  
39 psoriasis) identified through "ALD" chronic disease status or the hospital discharge  
40 ICD-10 codes, between January 1<sup>st</sup>, 2016, and December 31<sup>st</sup>, 2024.
- 41 - adults with follow-up starting on the date of the first filled prescription of a JAKi  
42 (baricitinib, upadacitinib, or abrocitinib), dupilumab, tralokinumab, cyclosporine, or  
43 methotrexate, up until August 31<sup>st</sup>, 2025.  
44  
45  
46  
47  
48  
49  
50  
51  
52  
53  
54  
55  
56

### 57 **Outcomes**

58  
59  
60

1  
2  
3 The cases will be adults with AD and incident deep vein thrombosis or pulmonary embolism,  
4 managed in an outpatient setting, a hospital, or an emergency department.

5  
6 VTEs managed in hospital or an emergency department will be identified through the hospital  
7 discharge ICD-10 code (Table 2). VTEs managed in outpatient settings will be identified by  
8 applying the validated EPIGETBAM algorithm (manuscript under submission).  
9

10  
11 The index date is the date of the VTE.

12  
13 To study cases of “unprovoked” VTEs, we will exclude the following cases of adults with  
14 “provoked” VTEs (35):  
15

- 16 - initiation of oral oestrogenic contraceptive in the three months before the index  
17 date.
- 18 - pregnancy (including a two-month postpartum period) before the index date.
- 19 - surgery (orthopaedic surgery involving long bones or the pelvis, or other major surgery)  
20 in the four weeks before the index date.
- 21 - prolonged hospitalisation (>72 hours) in the four weeks before the index date.
- 22 - a diagnosis of cancer (including haematological malignancies but not including non-  
23 melanoma skin cancer) before the index date.
- 24 - fulfilment of one or more prescriptions for preventive or curative treatments with  
25 anticoagulants, including heparins, anti-vitamin K agents, and direct oral anticoagulant  
26 (ensuring the exclusion of patients with a history of VTEs and persistent risk factors for  
27 VTE recurrence) before the index date (for VTEs managed in hospital or in an  
28 emergency department) or before the index date minus 7 days (for adults starting an  
29 anticoagulant treatment before hospitalization for VTE).  
30  
31  
32  
33  
34  
35  
36  
37  
38  
39  
40  
41  
42  
43  
44

#### 45 **Data analysis**

46  
47 The characteristics of the JAKi-treated population of patients with AD will be described,  
48 together with the time interval between JAKi initiation and the occurrence of the VTE. We will  
49 explore the risk function and the potential time-varying association.  
50  
51

#### 52 ***Analysis #1: a nested case-control study of a cohort of adults with AD***

53  
54  
55 The association between exposure to JAKi and the occurrence of VTEs will be investigated in  
56 a nested case-control study of a cohort of adults with AD requiring systemic treatment.  
57  
58  
59  
60

1  
2  
3 Adults with AD will be considered to have been exposed to JAKis if they have at least one  
4 fulfilled prescription for a JAKi prior to the index date. Adults with AD will be assigned to a  
5 “JAKi user” category or a “JAKi never-user” category, based on the prior fulfilment closest to  
6 the index date. Subgroups of JAKi users will be defined as follows: for current JAKis users, the  
7 last prescription will have been fulfilled in the month before the index date: for recent JAKis  
8 users, the last prescription will have been fulfilled between one and four months before the  
9 index date; and for past JAKis users, the last prescription will have been fulfilled more than  
10 four months before the index date. Furthermore, for current JAKis users; the number of JAKi  
11 prescription fulfilments and the total cumulative dose of JAKis received before the index date  
12 will be calculated.  
13  
14  
15  
16  
17  
18  
19

20 References will be adults with AD whose most recent prescription fulfilment before the index  
21 date (regardless of how long before) will have been for another systemic treatment for AD.  
22  
23

24 For each case (adults with AD having experienced a VTE), four controls will be selected from  
25 the target AD cohort. Controls must not have experienced a VTE at the time of their selection.  
26 Cases and controls will be matched for age, sex, and length of exposure at the case’s index date.  
27 The inclusion and exclusion criteria applied to cases will be applied to the matched controls. It  
28 will be possible for a control to become a case after his/her selection (density sampling) (36).  
29 We will estimate odds ratios (ORs) using conditional logistic regression. We will consider  
30 systemic treatment of AD as a binary variable: JAKi users (baricitinib, upadacitinib, or  
31 abrocitinib) vs. users of other systemic drugs (dupilumab, tralokinumab, cyclosporine, or  
32 methotrexate). We will consider drug exposure as a continuous variable. The primary analysis  
33 will compare current JAKi users with JAKi never-users. The secondary analyses will cover  
34 “recent JAKi user” status, “past JAKi user” status, and use of each individual JAKi (baricitinib,  
35 upadacitinib, and abrocitinib). A Schneeweiss diagram for analysis #1 is shown in Figure 2  
36 (37).  
37  
38  
39  
40  
41  
42  
43  
44  
45  
46  
47  
48

49 ***Analysis #2. A case-only design: a nested case-time-control study of a cohort of adults with***  
50 ***AD.***  
51

52 To evaluate whether or not initiation of a JAKi increases the risk of VTE in the following three  
53 months (i.e. a “triggering effect”), we will perform a case-time-control analysis.  
54  
55

56 In the field of pharmacoepidemiology, case-time-control studies can be used to study an acute,  
57 early-onset adverse event during treatment (38). A VTE is sudden (with a short time interval  
58 between the pathophysiological cause and the clinical manifestations) and is easy to date by  
59  
60

1  
2  
3 screening for specific treatments and additional investigations (including Doppler ultrasound).  
4 The majority of the VTEs observed in clinical trials (22) or reported in pharmacovigilance  
5 databases (34) occurred within three to four months of JAKi initiation (39). Furthermore, the  
6 case-only design can control for potential confounding factors (such as obesity and physical  
7 activity) not recorded in the French health insurance database.  
8  
9

10  
11 Only AD patients exposed to a JAKi and having experienced a VTE (i.e. cases) will be  
12 analyzed. The case-time-control design compares the exposure status immediately before the  
13 event (the risk period) with exposure during a designated (earlier) reference period. Each VTE  
14 case will serve as his/her own control during a comparison of the risk period (0 to 3 months  
15 before occurrence of the VTE) with the reference period (3 to 6 months before occurrence of  
16 the VTE). Each VTE case will be assessed for exposure (yes/no) during the risk period and  
17 during the reference period. Only participants whose status differs when comparing the two  
18 periods (i.e. discordants) will be considered in our estimation of the OR. To take account of the  
19 expected increase in JAKi prescription, the case-time-control analysis will include a selection  
20 of controls matched with VTE cases. Each VTE case will be matched for age and sex with 5  
21 controls without VTEs and who will be randomly selected from the AD target cohort. The date  
22 of the VTE will be used as the index date for the matched controls. The above-defined risk and  
23 reference periods will be screened for JAKi initiation among the controls in the same way as  
24 among the cases, and a case-crossover OR for controls will be computed. The case-time-control  
25 OR [95%CI] will be estimated with a conditional logistic model by considering the interaction  
26 term between the exposure of interest (JAKi initiation) and the participant's status (case or  
27 control). The case-time-control OR will correspond to the ratio between the respective case-  
28 crossover ORs obtained in cases and controls.  
29  
30  
31  
32  
33  
34  
35  
36  
37  
38  
39  
40  
41  
42

43 Sensitivity analyses in which the durations of the risk and reference period are modified will be  
44 performed as follows: the risk period will be defined as 0 to 2 months or 0 to 4 months before  
45 the VTE, and the control period will be defined as 2 to 4 months or 4 to 8 months before the  
46 VTE. Furthermore, sensitivity analysis will be performed for analyses #1 and #2 by changing  
47 the patient selection criteria and excluding patients with asthma. Lastly, we shall exclude  
48 patients having initiated oral oestrogenic contraceptive in the 6 months or the 12 months  
49 before the date of the VTE in cases or the corresponding date in controls.  
50  
51  
52  
53  
54  
55  
56

## 57 **Covariates**

58  
59  
60

1  
2  
3 We used a directed acyclic graph (Figure 3) to describe covariates, mediators, and potential  
4 confounding factors in the relationship between JAKis and VTEs.

5  
6  
7 The results will be adjusted for several covariates, including the patient's chronic comorbidities  
8 (using Bannay et al.'s algorithm for use of the Charlson Comorbidity Index with an electronic  
9 healthcare database (40,41)) and the use of systemic corticosteroids (42). Obesity is either not  
10 documented or only partially documented in the SNDS database; in Europe, most adults with  
11 AD are not obese (43). The case-only design approach (analysis #2) avoids this potential  
12 confounding factor, since the patient is his/her own control. The SNDS database does not  
13 contain identifiable information on a family history of venous thromboembolic disease.

14  
15  
16 Asthma (the most important atopic comorbidity in AD) will be assessed and defined as follows:  
17 an ICD-10 code J45-J46 and/or at least two fulfilments of a drug for the treatment of obstructive  
18 airway diseases (an Anatomical Therapeutic Chemical (ATC) code of R03). The study variables  
19 are listed in Table 2.  
20  
21  
22  
23  
24  
25  
26  
27

### 28 **Sample size**

29  
30 Based on a frequency of exposure to JAKi among the targeted cohort of 25%, a 1:4 case to  
31 control ratio, and a statistical significance threshold of 0.05, the sample sizes required for a  
32 power of 80% in a comparison of JAKi exposure in cases vs. controls are as follows: 1836  
33 participants (306 cases and 1530 controls) for detecting an OR of 1.5, 618 participants (103  
34 cases and 515 controls) for detecting an OR of 2, 354 participants (59 cases and 295 controls)  
35 for detecting an OR of 2.5, 246 participants (41 cases and 205 controls) for detecting an OR of  
36 3, and 192 participants (32 cases and 160 controls) for detecting an OR of 3.5. These  
37 calculations do not take account of matching, which will tend to increase the power in an  
38 unknown manner. The estimated power calculation is given in Table 3. A final power  
39 calculation will be performed at the end of the study.  
40  
41  
42  
43  
44  
45  
46  
47

48 The estimated incidence of thromboembolic diseases in France is one per 1000 per year;  
49 approximately 50,000 adults with a follow-up of three years are required. The target population  
50 for baricitinib/upadacitinib has been estimated at between 26,500 and 42,500 by the French  
51 High Authority for Health (44); this is almost certainly an underestimate, given that courses of  
52 treatment with cyclosporine are short.  
53  
54  
55  
56  
57

### 58 **ETHICS AND DISSEMINATION**

1  
2  
3 In accordance with French legislation, the protocol has been approved by an independent ethics  
4 committee (*Comité éthique et scientifique pour les recherches, les études et les évaluations*  
5 *dans le domaine de la santé*, Paris, France; reference: 4523600, dated June 17<sup>th</sup>, 2021) and has  
6 been registered with the French National Data Protection Commission (*Commission Nationale*  
7 *de l'Informatique et des Libertés*, Paris, France; reference: 921265, dated June 28<sup>th</sup>, 2021). The  
8 study's findings will be published in peer-reviewed scientific journals and presented at  
9 international conferences

10 The data will be consulted via the French national health insurance system's (*Caisse Nationale*  
11 *de l'Assurance Maladie*) portal; the investigators' access is restricted to the scope of the study.  
12 The data were not extracted from the main database but were analyzed in a dedicated project  
13 area on the server. The investigators will comply with the reference framework applicable to  
14 the SNDS database (as set out in the government act dated March 22<sup>nd</sup>, 2017).

15 The study protocol has been registered at France's Health Data Hub ([www.health-data-hub.fr](http://www.health-data-hub.fr)).  
16 The statistical analysis plan and data management book will now be drafted. The first results  
17 are expected in late 2025. The study's findings will be published in peer-reviewed scientific  
18 journals and presented at international conferences

## 31 32 33 **DISCUSSION**

34 A population-based study of a cohort of AD adults documented in the SNDS French national  
35 health insurance database should provide additional insights on the potential association  
36 between VTE and JAKis (baricitinib, upadacitinib, and abrocitinib).

37 There are several possible pathophysiological explanations for an elevated risk of VTE during  
38 treatment with a JAKi. Firstly, the leading hypothesis states that the thrombogenic effect is  
39 related to the thrombocytosis associated with baricitinib use (22). However, a clear time-domain  
40 or quantitative association between the platelet count and the occurrence of VTE has not been  
41 observed (22). Furthermore, elevation of the platelet count is not observed in people treated  
42 with other JAKis, including upadacitinib (45). Secondly, the JAK 2 pathway has an important  
43 role in haematopoiesis and might promote VTE. Paradoxically, inhibition of the JAK2 pathway  
44 by JAKis does not account for the occurrence of VTE: in Vaquez disease and essential  
45 thrombocythemia, an activating mutation in JAK 2 increases the risk of arterial and venous  
46 thrombotic events (46). Data from mouse models suggest that JAK V617F expression induces  
47 hypersensitivity to fibrinogen, thrombopoietin, and other endogenous pro-thrombogenic factors  
48 (47).



1  
2  
3 The literature data on the potential risk are contradictory and do not enable a firm conclusion  
4 about the association between JAKis and VTE to be drawn. A false association might result  
5 from methodological bias. For example, selection bias occurs when including patients who have  
6 received several courses of systemic treatment (and so might have more severe disease and a  
7 higher thromboembolic risk) are included in clinical trials (especially in open-label trials in RA)  
8 (22,24). Confounding bias may occur because the disease treated with JAKi is itself associated  
9 with a higher risk of VTE; this is particularly true for RA. Indeed, the thromboembolic risk is  
10 known to be two to three times higher in patients with RA (25) than in the general population  
11 (28,48). The baseline risk also appears to be elevated other systemic inflammatory diseases,  
12 including inflammatory bowel disease (49,50). In contrast, adults managed for moderate-to-  
13 severe AD are not known to have an elevated thromboembolic risk and are also younger than  
14 patients with RA; hence, the baseline risk of VTEs is lower. Published data on this indication  
15 are scarce: the only two meta-analyses included data from four randomized clinical trials  
16 evaluating the efficacy of baricitinib and abrocitinib in AD (51). The lack of a significant  
17 association might have several explanations: (i) a lack of power would apply if the number of  
18 JAKi-exposed patients experiencing a VTE is low; meta-analyses have provided inconclusive  
19 results, due the rarity of the event and the predominant inclusion of clinical trial data; (ii)  
20 insufficient follow-up in clinical trials (given the latency between JAKi initiation and VTE  
21 occurrence); and (iii) a lack of specific detection of VTEs (requiring a targeted initial  
22 assessment and follow-up, and perhaps a longer follow-up period). Lastly, it is unclear whether  
23 the published studies considered only VTEs leading to a hospitalization or, in contrast, all  
24 VTEs. In France, the majority of VTEs are managed in an outpatient setting (52).

25  
26  
27  
28  
29  
30  
31  
32  
33  
34  
35  
36  
37  
38  
39  
40  
41 Our implementation of two complementary methodological approaches should shed more light  
42 on this question. The case-control study is carried out on a population of AD patients with  
43 similar disease severity levels and receiving similar intensities of systemic treatment. This  
44 design assumes that after initiation of a JAKi, the risk of a VTE is constant. The case-time-  
45 control design will be applied to address (i) the assumption whereby a JAKi triggers a VTE,  
46 and (ii) the issue of residual confounding factors. This study design is particularly suitable when  
47 the outcome is sudden and easily dated, as is the case here (53–55). The hypothetical triggering  
48 effect is based on (i) the transient thrombocytosis observed with baricitinib early after treatment  
49 initiation (56,57), (ii) pharmacovigilance data from France and North America (34,39), where  
50 more than half of the reported VTEs occurred within 120 days of JAKi initiation (39), and (iii)  
51 the fact that other drugs (such as contraceptives) can trigger VTEs (58–62). An increase over  
52 the study period in the prevalence of JAKi use for AD is expected; the case-time-control design  
53  
54  
55  
56  
57  
58  
59  
60

1  
2  
3 considers time-trends in the prevalence of exposure that might introduce a confounding effect  
4 in a case-crossover design. We chose to study “unprovoked” VTEs by excluding well-known  
5 risk factors for thromboembolic disease (63), such as cancer (64), surgery (65), immobilisation  
6 (proxy marker: a hospital stay), hospital admission (66), and the initiation of hormone therapy  
7 (67). Furthermore, we will adjust for the Charlson Comorbidity Index, which includes diabetes  
8 (68–71). However, obesity, black ethnicity (72), and a family history of thromboembolic  
9 disease are not documented in the SNDS database, and so we cannot rule out residual  
10 confounding in analysis #1 (the nested case-control study). In analysis #2 (the case-only  
11 design), cases serve as their own controls, which can mitigate the potential confounding factors  
12 (such as diet, smoking, the level of physical activity, and a family history of thromboembolic  
13 disease) not documented in healthcare databases (38,73).

14  
15  
16  
17  
18  
19  
20  
21  
22 Our study has several potential strengths, including the exhaustive nationwide coverage of the  
23 French population (thereby enabling an assessment of rare events and providing potentially  
24 greater statistical power); the theoretical absence of selection bias, given our use of the SNDS  
25 database; the quality of the recorded data (enabling estimation of the time of occurrence of  
26 VTEs); the implementation of two complementary methodological approaches; and the  
27 definitions of outcomes that encompass VTEs managed in out- and inpatient settings.

28  
29  
30  
31  
32  
33 The study’s potential limitations include the difficulty of tracking all VTEs (the use of an  
34 algorithm for the identification of inpatient and outpatient diagnoses of VTE in the health  
35 insurance database is, however, currently being validated); potential information bias on  
36 hormone therapy, since a proportion of these treatments are not reimbursed and therefore cannot  
37 be detected in the SNDS; a potential lack of statistical power; and inability to take account of  
38 some risk factors for VTEs (including obesity, and a family history of thromboembolic disease)  
39 in the case-control design – although we believe that these potential confounding factors should  
40 affect cases and controls to the same extent.  
41  
42  
43  
44  
45  
46  
47  
48  
49  
50  
51  
52  
53  
54  
55  
56  
57  
58  
59  
60

## FIGURE AND TABLE LEGENDS

**Figure 1:** Overall study design

**Figure 2:** Schneeweiss diagram for analysis #1 (37)

**Figure 3:** A directed acyclic graph of the relationship between JAKis, AD, and VTEs

**Table 1:** List of meta-analyses on the risk of VTEs during treatment with JAKis

**Table 2:** List of variables

**Table 3:** Power calculation for analysis #1

## STATEMENTS

### Contributorship statement

PB and CD wrote the first draft of the manuscript. PB, LMS, AL, DSS, GC, PG, AD, EO and CD conceived the scoping review and developed the research questions and the search strategy. All authors critically reviewed drafts and edited the manuscript.

### Competing interests

There are no competing interests for any author.

### Funding

There are no funders to report for this submission.

## ACKNOWLEDGMENTS

We would like to thank David Fraser for the English language revision.

**REFERENCES**

1. Bieber T. Atopic dermatitis. *N Engl J Med*. 3 avr 2008;358(14):1483-94.
2. Silverberg JI, Hanifin JM. Adult eczema prevalence and associations with asthma and other health and demographic factors: a US population-based study. *J Allergy Clin Immunol*. nov 2013;132(5):1132-8.
3. Barbarot S, Auziere S, Gadkari A, Girolomoni G, Puig L, Simpson EL, et al. Epidemiology of atopic dermatitis in adults: Results from an international survey. *Allergy*. juin 2018;73(6):1284-93.
4. Williams H, Robertson C, Stewart A, Ait-Khaled N, Anabwani G, Anderson R, et al. Worldwide variations in the prevalence of symptoms of atopic eczema in the International Study of Asthma and Allergies in Childhood. *J Allergy Clin Immunol*. janv 1999;103(1 Pt 1):125-38.
5. Flohr C, Mann J. New insights into the epidemiology of childhood atopic dermatitis. *Allergy*. janv 2014;69(1):3-16.
6. Wollenberg A, Barbarot S, Bieber T, Christen-Zaech S, Deleuran M, Fink-Wagner A, et al. Consensus-based European guidelines for treatment of atopic eczema (atopic dermatitis) in adults and children: part I. *J Eur Acad Dermatol Venereol JEADV*. mai 2018;32(5):657-82.
7. Wollenberg A, Barbarot S, Bieber T, Christen-Zaech S, Deleuran M, Fink-Wagner A, et al. Consensus-based European guidelines for treatment of atopic eczema (atopic dermatitis) in adults and children: part II. *J Eur Acad Dermatol Venereol JEADV*. juin 2018;32(6):850-78.
8. Blauvelt A, de Bruin-Weller M, Gooderham M, Cather JC, Weisman J, Pariser D, et al. Long-term management of moderate-to-severe atopic dermatitis with dupilumab and concomitant topical corticosteroids (LIBERTY AD CHRONOS): a 1-year, randomised, double-blinded, placebo-controlled, phase 3 trial. *Lancet Lond Engl*. 10 juin 2017;389(10086):2287-303.
9. Simpson EL, Bieber T, Guttman-Yassky E, Beck LA, Blauvelt A, Cork MJ, et al. Two Phase 3 Trials of Dupilumab versus Placebo in Atopic Dermatitis. *N Engl J Med*. 15 déc 2016;375(24):2335-48.
10. Simpson EL, Lacour J-P, Spelman L, Galimberti R, Eichenfield LF, Bissonnette R, et al. Baricitinib in patients with moderate-to-severe atopic dermatitis and inadequate response to topical corticosteroids: results from two randomized monotherapy phase III trials. *Br J Dermatol*. août 2020;183(2):242-55.
11. Simpson EL, Forman S, Silverberg JI, Zirwas M, Maverakis E, Han G, et al. Baricitinib in patients with moderate-to-severe atopic dermatitis: Results from a randomized monotherapy phase 3 trial in the United States and Canada (BREEZE-AD5). *J Am Acad Dermatol*. juill 2021;85(1):62-70.
12. Reich K, Kabashima K, Peris K, Silverberg JI, Eichenfield LF, Bieber T, et al. Efficacy and Safety of Baricitinib Combined With Topical Corticosteroids for Treatment of

- 1  
2  
3 Moderate to Severe Atopic Dermatitis: A Randomized Clinical Trial. *JAMA Dermatol.* 1  
4 déc 2020;156(12):1333-43.  
5  
6  
7 13. King B, Maari C, Lain E, Silverberg JI, Issa M, Holzwarth K, et al. Extended Safety  
8 Analysis of Baricitinib 2 mg in Adult Patients with Atopic Dermatitis: An Integrated  
9 Analysis from Eight Randomized Clinical Trials. *Am J Clin Dermatol.* mai  
10 2021;22(3):395-405.  
11  
12 14. Guttman-Yassky E, Teixeira HD, Simpson EL, Papp KA, Pangan AL, Blauvelt A, et al.  
13 Once-daily upadacitinib versus placebo in adolescents and adults with moderate-to-  
14 severe atopic dermatitis (Measure Up 1 and Measure Up 2): results from two replicate  
15 double-blind, randomised controlled phase 3 trials. *Lancet Lond Engl.* 5 juin  
16 2021;397(10290):2151-68.  
17  
18 15. Reich K, Teixeira HD, de Bruin-Weller M, Bieber T, Soong W, Kabashima K, et al.  
19 Safety and efficacy of upadacitinib in combination with topical corticosteroids in  
20 adolescents and adults with moderate-to-severe atopic dermatitis (AD Up): results from  
21 a randomised, double-blind, placebo-controlled, phase 3 trial. *Lancet Lond Engl.* 5 juin  
22 2021;397(10290):2169-81.  
23  
24 16. AbbVie. A Phase 3b Multicenter, Randomized, Double-Blind, Double-Dummy, Active  
25 Controlled Study Comparing the Safety and Efficacy of Upadacitinib to Dupilumab in  
26 Adult Subjects With Moderate to Severe Atopic Dermatitis [Internet]. *clinicaltrials.gov*;  
27 2021 juill [cité 5 juill 2021]. Report No.: NCT03738397. Disponible sur:  
28 <https://clinicaltrials.gov/ct2/show/NCT03738397>  
29  
30 17. Simpson EL, Sinclair R, Forman S, Wollenberg A, Aschoff R, Cork M, et al. Efficacy  
31 and safety of abrocitinib in adults and adolescents with moderate-to-severe atopic  
32 dermatitis (JADE MONO-1): a multicentre, double-blind, randomised, placebo-  
33 controlled, phase 3 trial. *Lancet Lond Engl.* 25 juill 2020;396(10246):255-66.  
34  
35 18. Silverberg JI, Simpson EL, Thyssen JP, Gooderham M, Chan G, Feeney C, et al.  
36 Efficacy and Safety of Abrocitinib in Patients With Moderate-to-Severe Atopic  
37 Dermatitis: A Randomized Clinical Trial. *JAMA Dermatol.* 1 août 2020;156(8):863-73.  
38  
39 19. Bieber T, Simpson EL, Silverberg JI, Thaçi D, Paul C, Pink AE, et al. Abrocitinib versus  
40 Placebo or Dupilumab for Atopic Dermatitis. *N Engl J Med.* 25 mars  
41 2021;384(12):1101-12.  
42  
43 20. Wollenberg A, Blauvelt A, Guttman-Yassky E, Worm M, Lynde C, Lacour J-P, et al.  
44 Tralokinumab for moderate-to-severe atopic dermatitis: results from two 52-week,  
45 randomized, double-blind, multicentre, placebo-controlled phase III trials (ECZTRA 1  
46 and ECZTRA 2). *Br J Dermatol.* mars 2021;184(3):437-49.  
47  
48 21. Silverberg JI, Toth D, Bieber T, Alexis AF, Elewski BE, Pink AE, et al. Tralokinumab  
49 plus topical corticosteroids for the treatment of moderate-to-severe atopic dermatitis:  
50 results from the double-blind, randomized, multicentre, placebo-controlled phase III  
51 ECZTRA 3 trial. *Br J Dermatol.* mars 2021;184(3):450-63.  
52  
53 22. Taylor PC, Weinblatt ME, Burmester GR, Rooney TP, Witt S, Walls CD, et al.  
54 Cardiovascular Safety During Treatment With Baricitinib in Rheumatoid Arthritis.  
55 *Arthritis Rheumatol Hoboken NJ.* juill 2019;71(7):1042-55.  
56  
57  
58  
59  
60

- 1
- 2
- 3 23. European Medicines Agency. olumiant EPAR risk management plan summary
- 4 [Internet]. [cité 22 juill 2021]. Disponible sur:
- 5 [https://www.ema.europa.eu/en/documents/rmp-summary/olumiant-epar-risk-](https://www.ema.europa.eu/en/documents/rmp-summary/olumiant-epar-risk-management-plan-summary_en.pdf)
- 6 [management-plan-summary\\_en.pdf](https://www.ema.europa.eu/en/documents/rmp-summary/olumiant-epar-risk-management-plan-summary_en.pdf)
- 7
- 8
- 9 24. Food and Drug Administration. NDA 207924, Baricitinib, a JAK inhibitor for RA
- 10 [Internet]. 2018 [cité 16 mai 2021]. Disponible sur:
- 11 <https://www.fda.gov/media/112372/download>
- 12
- 13 25. Scott IC, Hider SL, Scott DL. Thromboembolism with Janus Kinase (JAK) Inhibitors for
- 14 Rheumatoid Arthritis: How Real is the Risk? *Drug Saf.* juill 2018;41(7):645-53.
- 15
- 16 26. Mogul A, Corsi K, McAuliffe L. Baricitinib: The Second FDA-Approved JAK Inhibitor
- 17 for the Treatment of Rheumatoid Arthritis. *Ann Pharmacother.* sept 2019;53(9):947-53.
- 18
- 19 27. Cohen SB, van Vollenhoven RF, Winthrop KL, Zerbini CAF, Tanaka Y, Bessette L, et
- 20 al. Safety profile of upadacitinib in rheumatoid arthritis: integrated analysis from the
- 21 SELECT phase III clinical programme. *Ann Rheum Dis.* 28 oct 2020;
- 22
- 23 28. Molander V, Bower H, Frisell T, Askling J. Risk of venous thromboembolism in
- 24 rheumatoid arthritis, and its association with disease activity: a nationwide cohort study
- 25 from Sweden. *Ann Rheum Dis.* févr 2021;80(2):169-75.
- 26
- 27 29. Downing LJ, Strieter RM, Kadell AM, Wilke CA, Austin JC, Hare BD, et al. IL-10
- 28 regulates thrombus-induced vein wall inflammation and thrombosis. *J Immunol Baltim*
- 29 *Md* 1950. 1 août 1998;161(3):1471-6.
- 30
- 31 30. Riley JK, Takeda K, Akira S, Schreiber RD. Interleukin-10 receptor signaling through
- 32 the JAK-STAT pathway. Requirement for two distinct receptor-derived signals for anti-
- 33 inflammatory action. *J Biol Chem.* 4 juin 1999;274(23):16513-21.
- 34
- 35 31. Desai RJ, Pawar A, Weinblatt ME, Kim SC. Comparative Risk of Venous
- 36 Thromboembolism in Rheumatoid Arthritis Patients Receiving Tofacitinib Versus Those
- 37 Receiving Tumor Necrosis Factor Inhibitors: An Observational Cohort Study. *Arthritis*
- 38 *Rheumatol* Hoboken NJ. juin 2019;71(6):892-900.
- 39
- 40 32. Desai RJ, Pawar A, Khosrow-Khavar F, Weinblatt ME, Kim SC. Risk of venous
- 41 thromboembolism associated with tofacitinib in patients with rheumatoid arthritis: a
- 42 population-based cohort study. *Rheumatol Oxf Engl.* 22 mars 2021;keab294.
- 43
- 44 33. Meyers KJ, Silverberg JI, Rueda MJ, Goodloe R, Pierce EJ, Deberdt W, et al. Risk of
- 45 Venous Thromboembolism Among Patients with Atopic Dermatitis: A Cohort Study in a
- 46 US Administrative Claims Database. *Dermatol Ther.* juin 2021;11(3):1041-52.
- 47
- 48 34. Setyawan J, Azimi N, Strand V, Yarur A, Fridman M. Reporting of Thromboembolic
- 49 Events with JAK Inhibitors: Analysis of the FAERS Database 2010–2019. *Drug Saf.*
- 50 2021;44(8):889-97.
- 51
- 52 35. Di Nisio M, van Es N, Büller HR. Deep vein thrombosis and pulmonary embolism.
- 53 *Lancet Lond Engl.* 17 déc 2016;388(10063):3060-73.
- 54
- 55 36. Rothman KJ, Greenland S, Lash TL. *Modern epidemiology.* 2008.
- 56
- 57
- 58
- 59
- 60

- 1
- 2
- 3 37. Schneeweiss S, Rassen JA, Brown JS, Rothman KJ, Happe L, Arlett P, et al. Graphical
- 4 Depiction of Longitudinal Study Designs in Health Care Databases. *Ann Intern Med.* 19
- 5 mars 2019;170(6):398-406.
- 6
- 7 38. Consiglio GP, Burden AM, Maclure M, McCarthy L, Cadarette SM. Case-crossover
- 8 study design in pharmacoepidemiology: systematic review and recommendations.
- 9 *Pharmacoepidemiol Drug Saf.* nov 2013;22(11):1146-53.
- 10
- 11 39. Comité scientifique permanent Surveillance et pharmacovigilance du 24/09/2019 -
- 12 Formation restreinte Expertise - Compte-rendu (07/02/2020) [Internet]. [cité 20 mai
- 13 2021]. Disponible sur: [https://archiveansm.integra.fr/Mediatheque/Publications/Ordres-](https://archiveansm.integra.fr/Mediatheque/Publications/Ordres-du-jour-comptes-rendus-des-commissions-comites-groupes-de-travail-Comites-scientifiques-permanents)
- 14 [du-jour-comptes-rendus-des-commissions-comites-groupes-de-travail-Comites-](https://archiveansm.integra.fr/Mediatheque/Publications/Ordres-du-jour-comptes-rendus-des-commissions-comites-groupes-de-travail-Comites-scientifiques-permanents)
- 15 [scientifiques-permanents](https://archiveansm.integra.fr/Mediatheque/Publications/Ordres-du-jour-comptes-rendus-des-commissions-comites-groupes-de-travail-Comites-scientifiques-permanents)
- 16
- 17
- 18 40. Bannay A, Chaignot C, Blotière P-O, Basson M, Weill A, Ricordeau P, et al. The Best
- 19 Use of the Charlson Comorbidity Index With Electronic Health Care Database to Predict
- 20 Mortality. *Med Care.* févr 2016;54(2):188-94.
- 21
- 22 41. Charlson M, Szatrowski TP, Peterson J, Gold J. Validation of a combined comorbidity
- 23 index. *J Clin Epidemiol.* nov 1994;47(11):1245-51.
- 24
- 25 42. Johannesdottir SA, Horváth-Puhó E, Dekkers OM, Cannegieter SC, Jørgensen JOL,
- 26 Ehrenstein V, et al. Use of glucocorticoids and risk of venous thromboembolism: a
- 27 nationwide population-based case-control study. *JAMA Intern Med.* 13 mai
- 28 2013;173(9):743-52.
- 29
- 30 43. Zhang A, Silverberg JI. Association of atopic dermatitis with being overweight and
- 31 obese: a systematic review and metaanalysis. *J Am Acad Dermatol.* avr 2015;72(4):606-
- 32 616.e4.
- 33
- 34 44. Haute Autorité de Santé. Olumiant et dermatite atopique, avis de la commission de
- 35 transparence [Internet]. 2021 [cité 23 juill 2021]. Disponible sur: [https://www.has-](https://www.has-sante.fr/upload/docs/evamed/CT-18912_OLUMIANT_PIC_EI_DA_AvisDef_CT18912.pdf)
- 36 [sante.fr/upload/docs/evamed/CT-](https://www.has-sante.fr/upload/docs/evamed/CT-18912_OLUMIANT_PIC_EI_DA_AvisDef_CT18912.pdf)
- 37 [18912\\_OLUMIANT\\_PIC\\_EI\\_DA\\_AvisDef\\_CT18912.pdf](https://www.has-sante.fr/upload/docs/evamed/CT-18912_OLUMIANT_PIC_EI_DA_AvisDef_CT18912.pdf)
- 38
- 39 45. European Medicines Agency. Rinvoq-résumé des caractéristiques du produit [Internet].
- 40 European Medicines Agency. 2019 [cité 20 mai 2021]. Disponible sur:
- 41 <https://www.ema.europa.eu/en/medicines/human/EPAR/rinvoq>
- 42
- 43 46. Trifan G, Shafi N, Testai FD. Implications of Janus Kinase 2 Mutation in Embolic
- 44 Stroke of Unknown Source. *J Stroke Cerebrovasc Dis Off J Natl Stroke Assoc.* oct
- 45 2018;27(10):2572-8.
- 46
- 47 47. Hobbs CM, Manning H, Bennett C, Vasquez L, Severin S, Brain L, et al. JAK2V617F
- 48 leads to intrinsic changes in platelet formation and reactivity in a knock-in mouse model
- 49 of essential thrombocythemia. *Blood.* 28 nov 2013;122(23):3787-97.
- 50
- 51 48. Matta F, Singala R, Yaekoub AY, Najjar R, Stein PD. Risk of venous thromboembolism
- 52 with rheumatoid arthritis. *Thromb Haemost.* janv 2009;101(1):134-8.
- 53
- 54 49. Zöller B, Li X, Sundquist J, Sundquist K. Autoimmune diseases and venous
- 55 thromboembolism: a review of the literature. *Am J Cardiovasc Dis.* 2012;2(3):171-83.
- 56
- 57
- 58
- 59
- 60

- 1
- 2
- 3 50. Galloway J, Barrett K, Irving P, Khavandi K, Nijher M, Nicholson R, et al. Risk of
- 4 venous thromboembolism in immune-mediated inflammatory diseases: a UK matched
- 5 cohort study. *RMD Open*. sept 2020;6(3).
- 6
- 7
- 8 51. Giménez Poderós T, Gallardo Borge S, Vazquez-Ferreiro P. Risk of Venous
- 9 Thromboembolism Associated With Tofacitinib and Baricitinib: A Systematic Review
- 10 and Indirect Meta-Analysis. *Pharmacotherapy*. déc 2020;40(12):1248-64.
- 11
- 12 52. Schmidt C. Traitement ambulatoire des thromboses veineuses profondes des membres
- 13 inférieurs à la phase aiguë Outpatient treatment of deep vein thrombosis. 2002;6.
- 14
- 15 53. Maclure M. The case-crossover design: a method for studying transient effects on the
- 16 risk of acute events. *Am J Epidemiol*. 15 janv 1991;133(2):144-53.
- 17
- 18 54. Maclure M, Fireman B, Nelson JC, Hua W, Shoaibi A, Paredes A, et al. When should
- 19 case-only designs be used for safety monitoring of medical products?
- 20 *Pharmacoepidemiol Drug Saf*. janv 2012;21 Suppl 1:50-61.
- 21
- 22
- 23 55. Bykov K, Mittleman MA, Glynn RJ, Schneeweiss S, Gagne JJ. The Case-Crossover
- 24 Design for Drug-Drug Interactions: Considerations for Implementation. *Epidemiol*
- 25 *Camb Mass*. mars 2019;30(2):204-11.
- 26
- 27 56. Kremer J, Huizinga TWJ, Chen L, Saifan CG, Issa M, Witt SL, et al. FRI0090 Analysis
- 28 of neutrophils, lymphocytes, and platelets in pooled phase 2 and phase 3 studies of
- 29 baricitinib for rheumatoid arthritis. *Ann Rheum Dis*. 1 juin 2017;76(Suppl 2):512-512.
- 30
- 31
- 32 57. Olumiant [Internet]. European Medicines Agency. 2018 [cité 20 mai 2021]. Disponible
- 33 sur: <https://www.ema.europa.eu/en/medicines/human/EPAR/olumiant>
- 34
- 35 58. Norris LA, Bonnar J. Haemostatic changes and the oral contraceptive pill. *Baillieres Clin*
- 36 *Obstet Gynaecol*. sept 1997;11(3):545-64.
- 37
- 38 59. Norris LA, Bonnar J. Effect of oestrogen dose on whole blood platelet activation in
- 39 women taking new low dose oral contraceptives. *Thromb Haemost*. déc
- 40 1994;72(6):926-30.
- 41
- 42
- 43 60. Quehenberger P, Loner U, Kapiotis S, Handler S, Schneider B, Huber J, et al. Increased
- 44 levels of activated factor VII and decreased plasma protein S activity and circulating
- 45 thrombomodulin during use of oral contraceptives. *Thromb Haemost*. nov
- 46 1996;76(5):729-34.
- 47
- 48 61. Kelleher CC. Clinical aspects of the relationship between oral contraceptives and
- 49 abnormalities of the hemostatic system: relation to the development of cardiovascular
- 50 disease. *Am J Obstet Gynecol*. juill 1990;163(1 Pt 2):392-5.
- 51
- 52
- 53 62. Contraceptifs hormonaux combinés (pilules, anneau vaginal et patch) : Position finale du
- 54 Comité des médicaments à usage humain (CHMP) - Point d'information - ANSM :
- 55 Agence nationale de sécurité du médicament et des produits de santé [Internet]. [cité 22
- 56 sept 2021]. Disponible sur: [https://archiveansm.integra.fr/S-informer/Travaux-de-l-](https://archiveansm.integra.fr/S-informer/Travaux-de-l-Agence-Europeenne-des-Medicaments-EMA-Comite-des-medicaments-a-usage-humain-CHMP/Contraceptifs-hormonaux-combines-pilules-anneau-vaginal-et-patch-)
- 57 [Agence-Europeenne-des-Medicaments-EMA-Comite-des-medicaments-a-usage-](https://archiveansm.integra.fr/S-informer/Travaux-de-l-Agence-Europeenne-des-Medicaments-EMA-Comite-des-medicaments-a-usage-humain-CHMP/Contraceptifs-hormonaux-combines-pilules-anneau-vaginal-et-patch-)
- 58 [humain-CHMP/Contraceptifs-hormonaux-combines-pilules-anneau-vaginal-et-patch-](https://archiveansm.integra.fr/S-informer/Travaux-de-l-Agence-Europeenne-des-Medicaments-EMA-Comite-des-medicaments-a-usage-humain-CHMP/Contraceptifs-hormonaux-combines-pilules-anneau-vaginal-et-patch-)
- 59
- 60



1  
2  
3 Position-finale-du-Comite-des-medicaments-a-usage-humain-CHMP-Point-d-  
4 information  
5

- 6  
7 63. Heit JA, Spencer FA, White RH. The epidemiology of venous thromboembolism. *J*  
8 *Thromb Thrombolysis*. janv 2016;41(1):3-14.  
9  
10 64. Falanga A, Russo L, Milesi V, Vignoli A. Mechanisms and risk factors of thrombosis in  
11 cancer. *Crit Rev Oncol Hematol*. oct 2017;118:79-83.  
12  
13 65. Sweetland S, Parkin L, Balkwill A, Green J, Reeves G, Beral V, et al. Smoking, surgery,  
14 and venous thromboembolism risk in women: United Kingdom cohort study.  
15 *Circulation*. 26 mars 2013;127(12):1276-82.  
16  
17 66. Bjøri E, Johnsen HS, Hansen J-B, Brækkan SK. Hospitalization as a trigger for venous  
18 thromboembolism - Results from a population-based case-crossover study. *Thromb Res*.  
19 avr 2019;176:115-9.  
20  
21 67. Rott H. Prevention and treatment of venous thromboembolism during HRT: current  
22 perspectives. *Int J Gen Med*. 2014;7:433-40.  
23  
24 68. Aksu K, Donmez A, Keser G. Inflammation-induced thrombosis: mechanisms, disease  
25 associations and management. *Curr Pharm Des*. 2012;18(11):1478-93.  
26  
27 69. van den Oever I a. M, Sattar N, Nurmohamed MT. Thromboembolic and cardiovascular  
28 risk in rheumatoid arthritis: role of the haemostatic system. *Ann Rheum Dis*. juin  
29 2014;73(6):954-7.  
30  
31 70. Gaertner S, Cordeanu E-M, Mirea C, Frantz A-S, Auger C, Bilbault P, et al. Increased  
32 risk and severity of unprovoked venous thromboembolism with clustering cardiovascular  
33 risk factors for atherosclerosis: Results of the REMOTEV registry. *Int J Cardiol*. 1 févr  
34 2018;252:169-74.  
35  
36 71. Ageno W, Becattini C, Brighton T, Selby R, Kamphuisen PW. Cardiovascular risk  
37 factors and venous thromboembolism: a meta-analysis. *Circulation*. 1 janv  
38 2008;117(1):93-102.  
39  
40 72. Zakai NA, McClure LA, Judd SE, Safford MM, Folsom AR, Lutsey PL, et al. Racial and  
41 regional differences in venous thromboembolism in the United States in 3 cohorts.  
42 *Circulation*. 8 avr 2014;129(14):1502-9.  
43  
44 73. Hallas J, Pottegård A. Use of self-controlled designs in pharmacoepidemiology. *J Intern*  
45 *Med*. juin 2014;275(6):581-9.  
46  
47 74. Xie W, Huang Y, Xiao S, Sun X, Fan Y, Zhang Z. Impact of Janus kinase inhibitors on  
48 risk of cardiovascular events in patients with rheumatoid arthritis: systematic review and  
49 meta-analysis of randomised controlled trials. *Ann Rheum Dis*. août  
50 2019;78(8):1048-54.  
51  
52 75. Xie W, Xiao S, Huang Y, Sun X, Zhang Z. Effect of tofacitinib on cardiovascular events  
53 and all-cause mortality in patients with immune-mediated inflammatory diseases: a  
54 systematic review and meta-analysis of randomized controlled trials. *Ther Adv*  
55 *Musculoskelet Dis*. 2019;11:1759720X19895492.  
56  
57  
58  
59  
60

- 1  
2  
3 76. Olivera PA, Lasa JS, Bonovas S, Danese S, Peyrin-Biroulet L. Safety of Janus Kinase  
4 Inhibitors in Patients With Inflammatory Bowel Diseases or Other Immune-mediated  
5 Diseases: A Systematic Review and Meta-Analysis. *Gastroenterology*. mai  
6 2020;158(6):1554-1573.e12.  
7  
8  
9 77. Yates M, Mootoo A, Adas M, Bechman K, Rampes S, Patel V, et al. Venous  
10 thromboembolism risk with JAK inhibitors: A Meta-analysis. *Arthritis Rheumatol*  
11 *Hoboken NJ*. 10 nov 2020;  
12  
13 78. Wang F, Sun L, Wang S, Davis JM, Matteson EL, Murad MH, et al. Efficacy and Safety  
14 of Tofacitinib, Baricitinib, and Upadacitinib for Rheumatoid Arthritis: A Systematic  
15 Review and Meta-Analysis. *Mayo Clin Proc*. juill 2020;95(7):1404-19.  
16  
17 79. Bilal J, Riaz IB, Naqvi SAA, Bhattacharjee S, Obert MR, Sadiq M, et al. Janus Kinase  
18 Inhibitors and Risk of Venous Thromboembolism: A Systematic Review and Meta-  
19 analysis. *Mayo Clin Proc*. juill 2021;96(7):1861-73.  
20  
21  
22  
23  
24  
25  
26  
27  
28  
29  
30  
31  
32  
33  
34  
35  
36  
37  
38  
39  
40  
41  
42  
43  
44  
45  
46  
47  
48  
49  
50  
51  
52  
53  
54  
55  
56  
57  
58  
59  
60

- Nested case-control study (analysis #1)
- Nested case-time-control study (analysis #2): in patients with a VTE, we shall compare the frequency of JAKi initiation in the risk period (before VTE) with the frequency of JAKi initiation in the reference period (prior to the risk period).

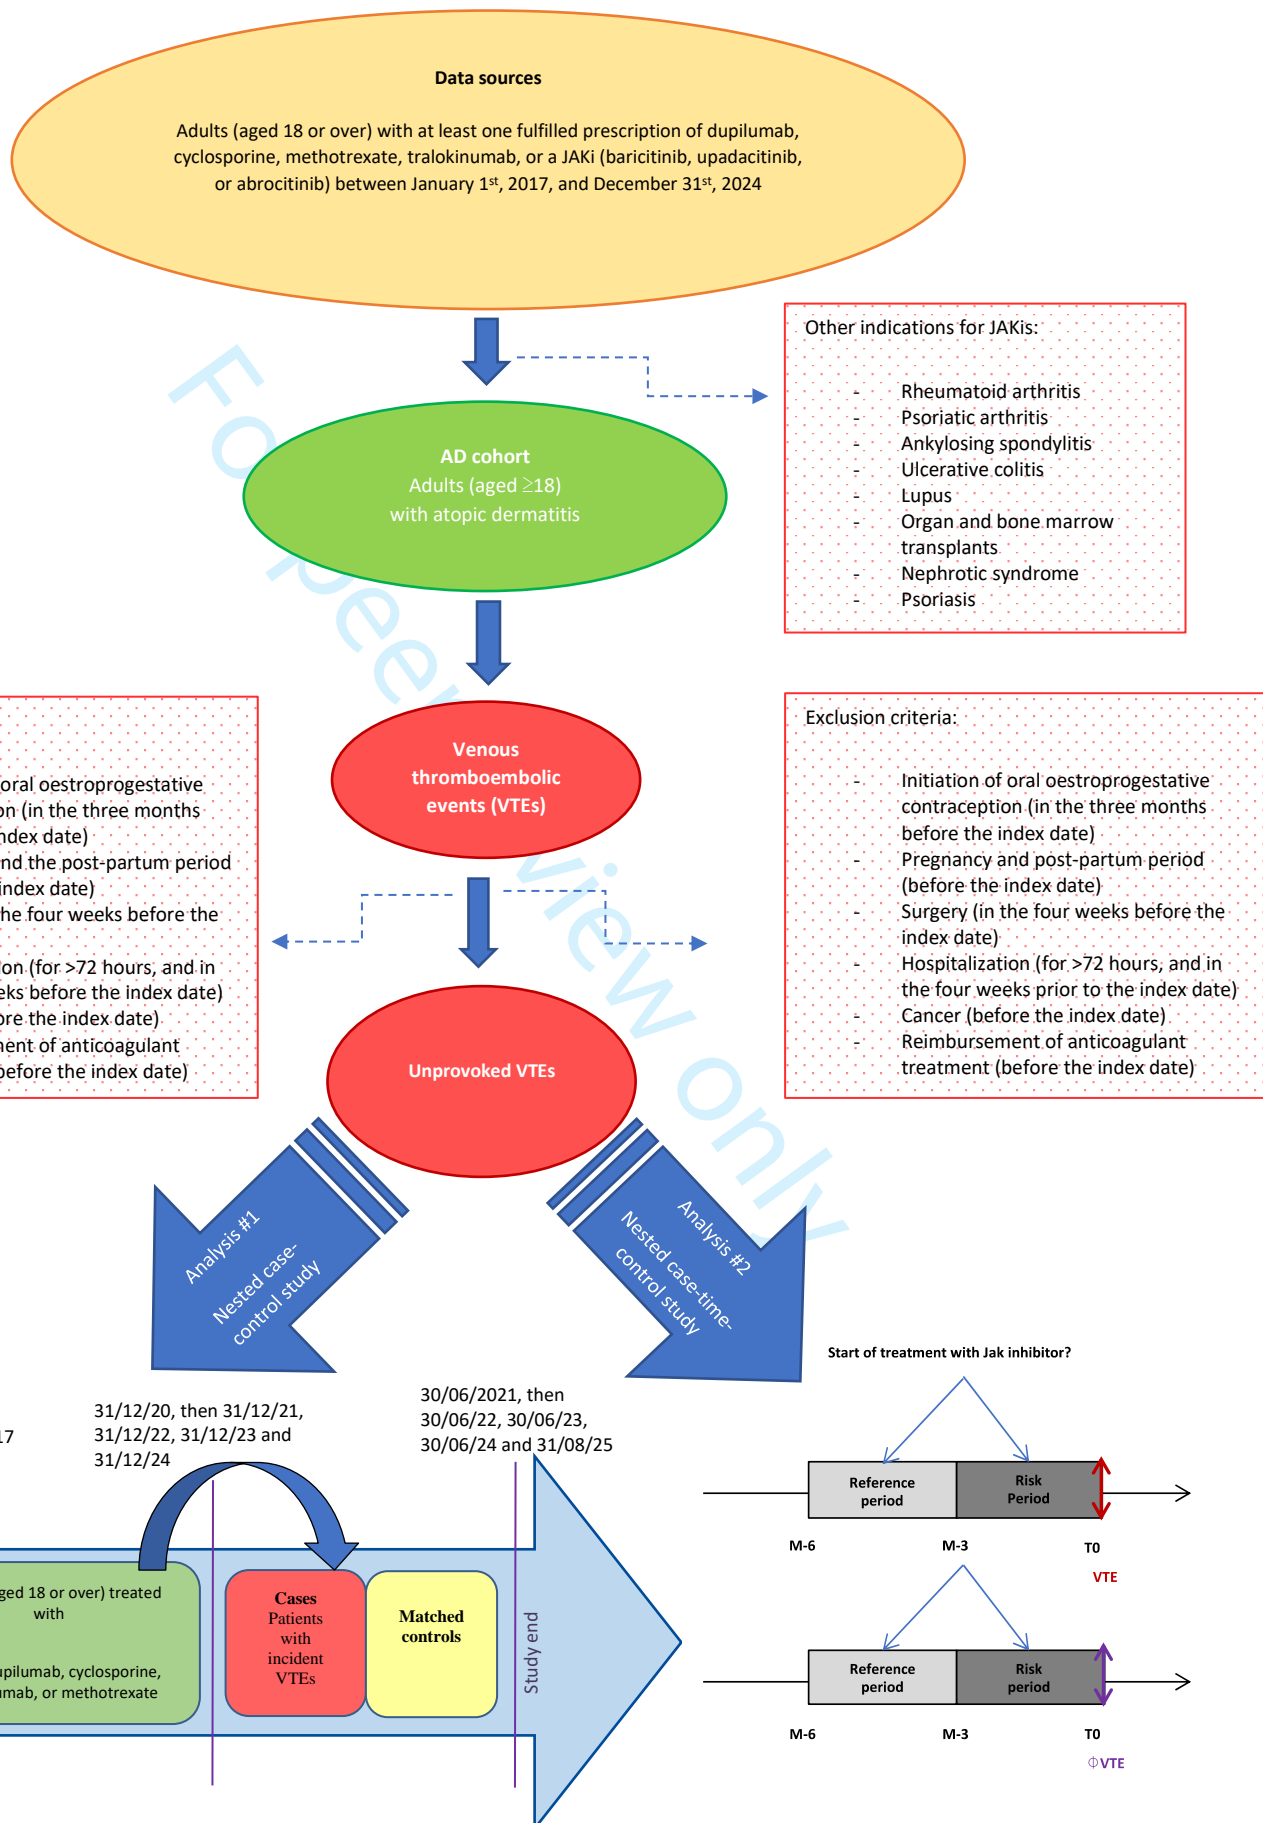

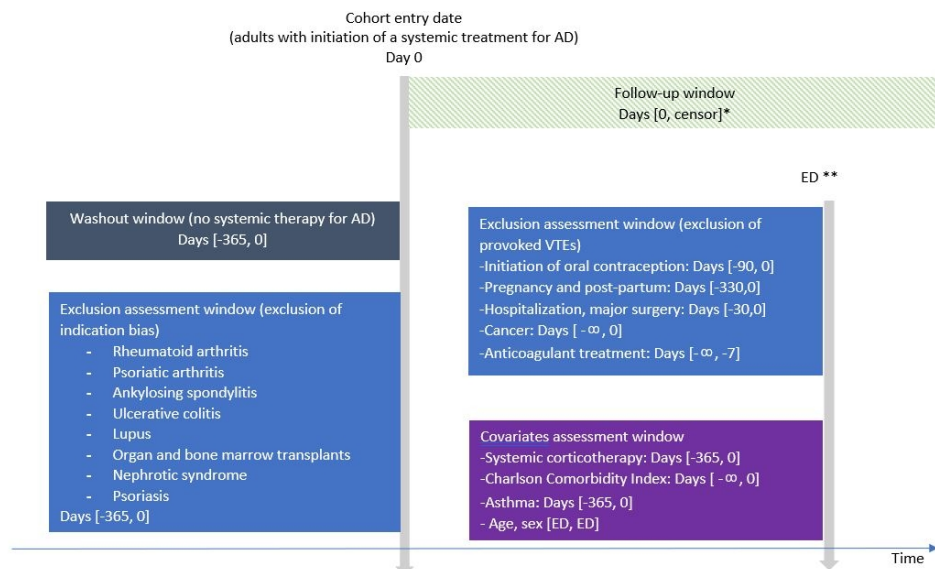

Abbreviations: AD, atopic dermatitis; ED, event date; VTE, venous thromboembolic event  
 \*Censored at the date of the first VTE, death, emigration, or the end of the study period  
 \*\* ED: the date of the first VTE (the index date)

Schneeweiss diagram for analysis # 1

192x121mm (144 x 144 DPI)

1  
2  
3  
4  
5  
6  
7  
8  
9  
10  
11  
12  
13  
14  
15  
16  
17  
18  
19  
20  
21  
22  
23  
24  
25  
26  
27  
28  
29  
30  
31  
32  
33  
34  
35  
36  
37  
38  
39  
40  
41  
42  
43  
44  
45  
46  
47  
48  
49  
50  
51  
52  
53  
54  
55  
56  
57  
58  
59  
60

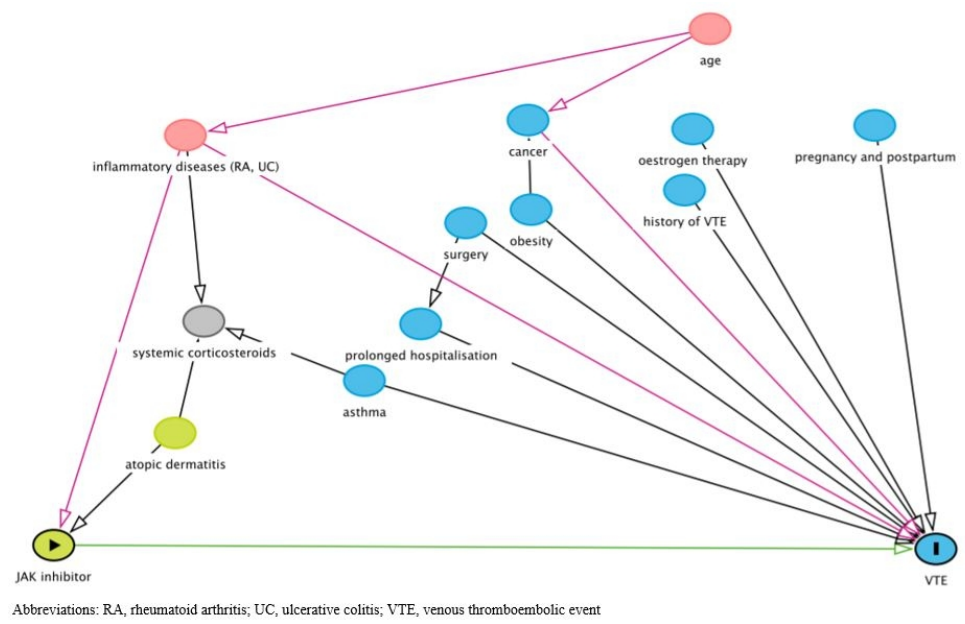

A directed acyclic graph of the relationship between JAKis, AD, and VTEs  
 168x105mm (144 x 144 DPI)

| First Author         | Date of publication | JAK inhibitor                                                                             | Indication                                                      | Number of studies included | Type of studies included | Number of patients included | Median follow-up (weeks)                                    | Number of events among exposed participants | Number of events among nonexposed participants | Results OR (95%CI)                                                                                                                                                                                                             | Methods used                                                                                        |
|----------------------|---------------------|-------------------------------------------------------------------------------------------|-----------------------------------------------------------------|----------------------------|--------------------------|-----------------------------|-------------------------------------------------------------|---------------------------------------------|------------------------------------------------|--------------------------------------------------------------------------------------------------------------------------------------------------------------------------------------------------------------------------------|-----------------------------------------------------------------------------------------------------|
| Xie (74)             | 2019                | Tofacitinib<br>Baricitinib<br>Upadacitinib<br>Peficitinib<br>Decernotinib                 | RA                                                              | 26                         | RCT                      | 11799                       | Placebo-controlled period: 12<br>Dose-comparison period: 24 | 12                                          | 3                                              | All JAKis: 1.16 (0.48-2.81)<br>Tofacitinib: 0.17 (0.03-1.05)<br>Baricitinib: 2.33 (0.62-8.75)<br>Upadacitinib: 1.77 (0.20-16.00)                                                                                               | Mantel-Haenszel fixed-effect method                                                                 |
| Xie (75)             | 2019                | Tofacitinib                                                                               | RA, PsA, CPP, UC, CD, AS                                        | 27                         | RCT                      | 13611                       | Placebo-controlled period: 12<br>Dose-comparison period: 24 | 1                                           | 5                                              | 0.03 (0.00-0.21)                                                                                                                                                                                                               | Peto method                                                                                         |
| Olivera (76)         | 2020                | Tofacitinib<br>Upadacitinib<br>Filgotinib<br>Baricitinib                                  | RA, AS, UC, CD, CPP                                             | 10                         | RCT Cohorts              | 5143                        | 26                                                          | 12                                          | 3                                              | All JAKis: 0.90 (0.32-2.54)                                                                                                                                                                                                    | Random-effects model                                                                                |
| Giménez Poderos (51) | 2020                | Tofacitinib<br>Baricitinib                                                                | RA, KT, UC, CPP, CD, PsA, AD, DKD, SLE, JIA, SS                 | 59                         | RCT Cohorts              | 25947                       | 16                                                          | 24                                          | 23                                             | Tofacitinib: 0.29 (0.10-0.84)<br>Baricitinib: 3.39 (0.82-14.04)                                                                                                                                                                | Fixed-effects or random-effects model, with application of the most conservative model in each case |
| Yates (77)           | 2020                | Tofacitinib<br>Baricitinib<br>Upadacitinib<br>Filgotinib                                  | RA, PsA, AS, UC, CD, CPP                                        | 42                         | RCT                      | 17269                       | unavailable                                                 | 15                                          | 4                                              | All JAKis: 0.68 (0.36-1.29)                                                                                                                                                                                                    | Mantel-Haenszel fixed-effect method                                                                 |
| Wang (78)            | 2020                | Upadacitinib                                                                              | RA                                                              | 3                          | RCT                      | 2852                        | unavailable                                                 | 3                                           | 1                                              | 2.34 (0.15-15.02)                                                                                                                                                                                                              | Random-effects model                                                                                |
| Bilal (79)           | 2021                | Abrocitinib, Baricitinib, Decernotinib, Filgotinib, Peficitinib, Ruxolitinib, Tofacitinib | RA, AD, SLE, CPP, AS, PsA, UC, Pancreatic cancer, Breast cancer | 29                         | RCT                      | 13910                       | 48                                                          | 50                                          | 27                                             | All JAKis: 0.91 (0.57-1.47)<br>Baricitinib: 1.12 (0.27-4.69)<br>Decernotinib: 1.07 (0.18-6.43)<br>Filgotinib: 2.13 (0.22-20.64)<br>Ruxolitinib: (0.31-2.29)<br>Upadacitinib: 2.25 (0.55-9.25)<br>Tofacitinib: 0.27 (0.08-0.89) | Random-effects model                                                                                |

Abbreviations: AD, atopic dermatitis; AS, ankylosing spondylarthritis; CD, Crohn's disease; CI, confidence interval; CPP, Chronic Plaque Psoriasis; DKD, diabetic kidney disease; IR, incidence rates; JAKi, Janus kinase inhibitor; JIA, juvenile idiopathic arthritis; KT, kidney transplantation; OR, odds ratio; PsA, psoriatic arthritis; RA, rheumatoid arthritis; RCT, randomized clinical trial; SLE, systemic lupus erythematosus; SS, systemic sclerosis; UC, ulcerative colitis.

| Variables                                        | Registry   | Code                                                                                                                                                                                                                                                                                                                                                  |
|--------------------------------------------------|------------|-------------------------------------------------------------------------------------------------------------------------------------------------------------------------------------------------------------------------------------------------------------------------------------------------------------------------------------------------------|
| <b>Atopic dermatitis</b>                         |            |                                                                                                                                                                                                                                                                                                                                                       |
| Atopic dermatitis                                | PMSI       | ICD-10 code L20                                                                                                                                                                                                                                                                                                                                       |
| Topical corticosteroids                          | DCIR       | ATC codes D07AB01, D07AB02, D07AB03, D07AB04, D07AB05, D07AB06, D07AB07, D07AB08, D07AB09, D07AB10, D07AB11, D07AB19, D07AB21, D07AB30, D07AC01, D07AC02, D07AC03, D07AC04, D07AC05, D07AC06, D07AC07, D07AC08, D07AC09, D07AC10, D07AC11, D07AC12, D07AC13, D07AC14, D07AC15, D07AC16, D07AC17, D07AC18, D07AC19, D07AC20, D07AC21, D07AD01, D07AD02 |
| Consultation with a dermatologist                | DCIR       | PFS_SPE_COD or PFE_SPE_COD code 05                                                                                                                                                                                                                                                                                                                    |
| <b>Exposure</b>                                  |            |                                                                                                                                                                                                                                                                                                                                                       |
| Baricitinib                                      | DCIR       | ATC code L04AA37                                                                                                                                                                                                                                                                                                                                      |
| Upadacitinib                                     | DCIR       | ATC code L04AA44                                                                                                                                                                                                                                                                                                                                      |
| Abrocitinib                                      | DCIR       | ATC code D11AH08                                                                                                                                                                                                                                                                                                                                      |
| Dupilumab                                        | DCIR       | ATC code D11AH05                                                                                                                                                                                                                                                                                                                                      |
| Tralokinumab                                     | DCIR       | ATC code D11AH07                                                                                                                                                                                                                                                                                                                                      |
| Cyclosporine                                     | DCIR       | ATC code L04AD01                                                                                                                                                                                                                                                                                                                                      |
| Methotrexate                                     | DCIR       | ATC code L01BA01                                                                                                                                                                                                                                                                                                                                      |
| <b>Venous thromboembolic events</b>              |            |                                                                                                                                                                                                                                                                                                                                                       |
| Venous thromboembolic events                     | PMSI, DCIR | EPIGETBAM algorithm under submission                                                                                                                                                                                                                                                                                                                  |
| <b>Exclusion criteria</b>                        |            |                                                                                                                                                                                                                                                                                                                                                       |
| Oral oestrogenic                                 | DCIR       | ATC codes G03AA01, G03AA02, G03AA03, G03AA04, G03AA05, G03AA06, G03AA07, G03AA08, G03AA09, G03AA10, G03AA11, G03AA12, G03AA13, G03AA14, G03AA15, G03AA16, G03AB01, G03AB02, G03AB03, G03AB04, G03AB05, G03AB06, G03AB07, G03AB08                                                                                                                      |
| Pregnancy                                        | PMSI       | ICD-10 code Z321                                                                                                                                                                                                                                                                                                                                      |
| Hospital stay >72 hours, with or without surgery | PMSI       | ICD-10 codes                                                                                                                                                                                                                                                                                                                                          |
| Cancer and haematological malignancies           | PMSI       | ICD-10 codes C00 to C43 and C45 to C97, D00 to D03, D05 to D09, D37 to D48, or ALD n°30                                                                                                                                                                                                                                                               |
| Anticoagulant treatment                          | DCIR       | ATC codes B01AA01, B01AA02, B01AA03, B01AA04, B01AA07, B01AA08, B01AA09, B01AA10, B01AA11, B01AA12, B01AB01, B01AB02, B01AB04, B01AB05, B01AB06, B01AB07, B01AB08, B01AB09, B01AB10, B01AB11, B01AB12, B01AB51, B01AE01, B01AE02, B01AE03, B01AE04, B01AE05, B01AE06, B01AE07, B01AF01, B01AF02, B01AF03, B01AX01, B01AX04, B01AX05                   |
| Rheumatoid arthritis                             | PMSI DCIR  | ICD-10 codes M069, M0690, M0691, M0692, M0693, M0694, M0695, M0696, M0697, M0698, M0699, M06 or ALD n°22                                                                                                                                                                                                                                              |
| Psoriatic arthritis                              | PMSI DCIR  | ICD-10 codes M0700, M0701, M0702, M0703, M0704, M0705, M0706, M0707, M0708, M0709, M072, M0720, M0721, M0722, M0723, M0724, M0725, M0726, M0727, M0728, M0729, M073, M0730, M0734, M0732, M0733, M0734, M0735, M0736, M0737, M0738, M0739                                                                                                             |

|                                   |              |                                                                                                                                              |
|-----------------------------------|--------------|----------------------------------------------------------------------------------------------------------------------------------------------|
| Ulcerative colitis                | PMSI<br>DCIR | ICD-10 codes K519 or ALD n°24                                                                                                                |
| Lupus                             | PMSI<br>DCIR | ICD-10 codes L93, M32 or ALD n°21                                                                                                            |
| Organ and bone marrow transplants | PMSI<br>DCIR | ICD-10 codes Z940, Z941, Z942, Z943, Z944, Z945, Z946, Z947, Z948, Z9480, Z94800, Z94801, Z9481, Z9482, Z94802, Z94803, Z94804, Z94809, Z949 |
| Nephrotic syndrome                | PMSI<br>DCIR | ICD-10 code N04 or ALD n°19                                                                                                                  |
| Psoriasis                         | PMSI<br>DCIR | ICD-10 code L40, L400, L401, L402, L403, L404, L405, L408, L409                                                                              |
| Ankylosing spondylitis            | PMSI         | ICD-10 codes M45, M450, M451, M452, M453, M454, M455, M456, M457, M458, M459 or ALD n°27                                                     |
| <b>Covariates</b>                 |              |                                                                                                                                              |
| Charlson Comorbidity Index        | PMSI         | Algorithm developed by Bannay et al. (40)                                                                                                    |
| Systemic corticosteroids          | DCIR         | ATC codes H02A and H02B                                                                                                                      |
| Asthma                            | PMSI<br>DCIR | ICD-10 codes J45, J450, J451, J458, J459, J46<br>ATC code R03                                                                                |

Abbreviations: ALD, *affection longue durée* long-term chronic disease status giving entitlement to full coverage of related healthcare costs; ATC, Anatomical Therapeutic Chemical; DCIR, Données de Consommation Inter Régimes; ICD-10, International Classification of Diseases 10th Revision; PMSI, Programme de Médicalisation des Systèmes d'Information.



| Frequency of exposure to JAKis in the targeted cohort | Odds ratio | Nominal power | Number of controls | Number of cases | Total number of participants |
|-------------------------------------------------------|------------|---------------|--------------------|-----------------|------------------------------|
| 0.50                                                  | 1.5        | 0.8           | 1275               | 255             | 1530                         |
| 0.50                                                  | 2.0        | 0.8           | 465                | 93              | 558                          |
| 0.50                                                  | 3.0        | 0.8           | 205                | 41              | 246                          |
| 0.25                                                  | 1.5        | 0.8           | 1530               | 306             | 1836                         |
| 0.25                                                  | 2.0        | 0.8           | 515                | 103             | 618                          |
| 0.25                                                  | 2.5        | 0.8           | 295                | 59              | 354                          |
| 0.25                                                  | 3.0        | 0.8           | 205                | 41              | 246                          |
| 0.25                                                  | 3.5        | 0.8           | 160                | 32              | 192                          |

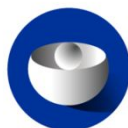

EUROPEAN MEDICINES AGENCY  
SCIENCE MEDICINES HEALTH

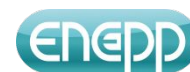

European Network of Centres for  
Pharmacoepidemiology and  
Pharmacovigilance

Doc.Ref. EMA/540136/2009

## ENCePP Checklist for Study Protocols (Revision 4)

Adopted by the ENCePP Steering Group on 15/10/2018

The [European Network of Centres for Pharmacoepidemiology and Pharmacovigilance \(ENCePP\)](#) welcomes innovative designs and new methods of research. This Checklist has been developed by ENCePP to stimulate consideration of important principles when designing and writing a pharmacoepidemiological or pharmacovigilance study protocol. The Checklist is intended to promote the quality of such studies, not their uniformity. The user is also referred to the [ENCePP Guide on Methodological Standards in Pharmacoepidemiology](#), which reviews and gives direct electronic access to guidance for research in pharmacoepidemiology and pharmacovigilance.

For each question of the Checklist, the investigator should indicate whether or not it has been addressed in the study protocol. If the answer is "Yes", the section number of the protocol where this issue has been discussed should be specified. It is possible that some questions do not apply to a particular study (for example, in the case of an innovative study design). In this case, the answer 'N/A' (Not Applicable) can be checked and the "Comments" field included for each section should be used to explain why. The "Comments" field can also be used to elaborate on a "No" answer.

This Checklist should be included as an Annex by marketing authorisation holders when submitting the protocol of a non-interventional post-authorisation safety study (PASS) to a regulatory authority (see the [Guidance on the format and content of the protocol of non-interventional post-authorisation safety studies](#)). The Checklist is a supporting document and does not replace the format of the protocol for PASS presented in the Guidance and Module VIII of the Good pharmacovigilance practices (GVP).

**Study title:** Oral Janus kinases inhibitors and venous thromboembolism in atopic dermatitis: Protocol of a case-time control study and a nested case-control study based on French SNDS cohort

**EU PAS Register® number:**  
**Study reference number (if applicable):**

| <b>Section 1: Milestones</b>                | <b>Yes</b>                          | <b>No</b>                | <b>N/A</b>                          | <b>Section Number</b> |
|---------------------------------------------|-------------------------------------|--------------------------|-------------------------------------|-----------------------|
| 1.1 Does the protocol specify timelines for |                                     |                          |                                     |                       |
| 1.1.1 Start of data collection <sup>1</sup> | <input checked="" type="checkbox"/> | <input type="checkbox"/> | <input type="checkbox"/>            | p. 8                  |
| 1.1.2 End of data collection <sup>2</sup>   | <input checked="" type="checkbox"/> | <input type="checkbox"/> | <input type="checkbox"/>            | p. 8                  |
| 1.1.3 Progress report(s)                    | <input type="checkbox"/>            | <input type="checkbox"/> | <input checked="" type="checkbox"/> |                       |
| 1.1.4 Interim report(s)                     | <input type="checkbox"/>            | <input type="checkbox"/> | <input checked="" type="checkbox"/> |                       |

<sup>1</sup> Date from which information on the first study is first recorded in the study dataset or, in the case of secondary use of data, the date from which data extraction starts.

<sup>2</sup> Date from which the analytical dataset is completely available.

1  
2  
3  
4  
5  
6  
7  
8  
9  
10  
11  
12  
13  
14  
15  
16  
17  
18  
19  
20  
21  
22  
23  
24  
25  
26  
27  
28  
29  
30  
31  
32  
33  
34  
35  
36  
37  
38  
39  
40  
41  
42  
43  
44  
45  
46  
47  
48  
49  
50  
51  
52  
53  
54  
55  
56  
57  
58  
59  
60

| <b><u>Section 1: Milestones</u></b>        | <b>Yes</b>                          | <b>No</b>                           | <b>N/A</b>               | <b>Section Number</b> |
|--------------------------------------------|-------------------------------------|-------------------------------------|--------------------------|-----------------------|
| 1.1.5 Registration in the EU PAS Register® | <input type="checkbox"/>            | <input checked="" type="checkbox"/> | <input type="checkbox"/> | p.14                  |
| 1.1.6 Final report of study results.       | <input checked="" type="checkbox"/> | <input type="checkbox"/>            | <input type="checkbox"/> |                       |

Comments:

|  |
|--|
|  |
|--|

| <b><u>Section 2: Research question</u></b>                                                                                                                      | <b>Yes</b>                          | <b>No</b>                | <b>N/A</b>                          | <b>Section Number</b> |
|-----------------------------------------------------------------------------------------------------------------------------------------------------------------|-------------------------------------|--------------------------|-------------------------------------|-----------------------|
| 2.1 Does the formulation of the research question and objectives clearly explain:                                                                               | <input checked="" type="checkbox"/> | <input type="checkbox"/> | <input type="checkbox"/>            | p. 8                  |
| 2.1.1 Why the study is conducted? (e.g. to address an important public health concern, a risk identified in the risk management plan, an emerging safety issue) | <input checked="" type="checkbox"/> | <input type="checkbox"/> | <input type="checkbox"/>            | p. 7                  |
| 2.1.2 The objective(s) of the study?                                                                                                                            | <input checked="" type="checkbox"/> | <input type="checkbox"/> | <input type="checkbox"/>            | p. 8                  |
| 2.1.3 The target population? (i.e. population or subgroup to whom the study results are intended to be generalised)                                             | <input checked="" type="checkbox"/> | <input type="checkbox"/> | <input type="checkbox"/>            | p. 8                  |
| 2.1.4 Which hypothesis(-es) is (are) to be tested?                                                                                                              | <input checked="" type="checkbox"/> | <input type="checkbox"/> | <input type="checkbox"/>            | p. 8                  |
| 2.1.5 If applicable, that there is no <i>a priori</i> hypothesis?                                                                                               | <input type="checkbox"/>            | <input type="checkbox"/> | <input checked="" type="checkbox"/> |                       |

Comments:

|  |
|--|
|  |
|--|

| <b><u>Section 3: Study design</u></b>                                                                                                                                                                 | <b>Yes</b>                          | <b>No</b>                | <b>N/A</b>                          | <b>Section Number</b> |
|-------------------------------------------------------------------------------------------------------------------------------------------------------------------------------------------------------|-------------------------------------|--------------------------|-------------------------------------|-----------------------|
| 3.1 Is the study design described? (e.g. cohort, case-control, cross-sectional, other design)                                                                                                         | <input checked="" type="checkbox"/> | <input type="checkbox"/> | <input type="checkbox"/>            | p. 8-13               |
| 3.2 Does the protocol specify whether the study is based on primary, secondary or combined data collection?                                                                                           | <input checked="" type="checkbox"/> | <input type="checkbox"/> | <input type="checkbox"/>            | p. 9                  |
| 3.3 Does the protocol specify measures of occurrence? (e.g., rate, risk, prevalence)                                                                                                                  | <input checked="" type="checkbox"/> | <input type="checkbox"/> | <input type="checkbox"/>            | p. 11-12              |
| 3.4 Does the protocol specify measure(s) of association? (e.g. risk, odds ratio, excess risk, rate ratio, hazard ratio, risk/rate difference, number needed to harm (NNH))                            | <input checked="" type="checkbox"/> | <input type="checkbox"/> | <input type="checkbox"/>            | p. 11-12              |
| 3.5 Does the protocol describe the approach for the collection and reporting of adverse events/adverse reactions? (e.g. adverse events that will not be collected in case of primary data collection) | <input type="checkbox"/>            | <input type="checkbox"/> | <input checked="" type="checkbox"/> |                       |

Comments:

|  |
|--|
|  |
|--|

| <b><u>Section 4: Source and study populations</u></b>    | <b>Yes</b>                          | <b>No</b>                | <b>N/A</b>               | <b>Section Number</b> |
|----------------------------------------------------------|-------------------------------------|--------------------------|--------------------------|-----------------------|
| 4.1 Is the source population described?                  | <input checked="" type="checkbox"/> | <input type="checkbox"/> | <input type="checkbox"/> | p. 9-10               |
| 4.2 Is the planned study population defined in terms of: |                                     |                          |                          |                       |
| 4.2.1 Study time period                                  | <input checked="" type="checkbox"/> | <input type="checkbox"/> | <input type="checkbox"/> | p. 8                  |

| <b>Section 4: Source and study populations</b>                                                                                                 | <b>Yes</b>                          | <b>No</b>                | <b>N/A</b>               | <b>Section Number</b> |
|------------------------------------------------------------------------------------------------------------------------------------------------|-------------------------------------|--------------------------|--------------------------|-----------------------|
| 4.2.2 Age and sex                                                                                                                              | <input checked="" type="checkbox"/> | <input type="checkbox"/> | <input type="checkbox"/> | p. 9                  |
| 4.2.3 Country of origin                                                                                                                        | <input checked="" type="checkbox"/> | <input type="checkbox"/> | <input type="checkbox"/> | p. 9                  |
| 4.2.4 Disease/indication                                                                                                                       | <input checked="" type="checkbox"/> | <input type="checkbox"/> | <input type="checkbox"/> | p. 9                  |
| 4.2.5 Duration of follow-up                                                                                                                    | <input checked="" type="checkbox"/> | <input type="checkbox"/> | <input type="checkbox"/> | p. 10                 |
| 4.3 Does the protocol define how the study population will be sampled from the source population? (e.g. event or inclusion/exclusion criteria) | <input checked="" type="checkbox"/> | <input type="checkbox"/> | <input type="checkbox"/> | p. 9-10               |

Comments:

|  |
|--|
|  |
|--|

| <b>Section 5: Exposure definition and measurement</b>                                                                                                                                               | <b>Yes</b>                          | <b>No</b>                           | <b>N/A</b>               | <b>Section Number</b> |
|-----------------------------------------------------------------------------------------------------------------------------------------------------------------------------------------------------|-------------------------------------|-------------------------------------|--------------------------|-----------------------|
| 5.1 Does the protocol describe how the study exposure is defined and measured? (e.g. operational details for defining and categorising exposure, measurement of dose and duration of drug exposure) | <input checked="" type="checkbox"/> | <input type="checkbox"/>            | <input type="checkbox"/> | p. 9                  |
| 5.2 Does the protocol address the validity of the exposure measurement? (e.g. precision, accuracy, use of validation sub-study)                                                                     | <input checked="" type="checkbox"/> | <input type="checkbox"/>            | <input type="checkbox"/> | p. 9                  |
| 5.3 Is exposure categorised according to time windows?                                                                                                                                              | <input checked="" type="checkbox"/> | <input type="checkbox"/>            | <input type="checkbox"/> | p. 11                 |
| 5.4 Is intensity of exposure addressed? (e.g. dose, duration)                                                                                                                                       | <input checked="" type="checkbox"/> | <input type="checkbox"/>            | <input type="checkbox"/> | p. 11                 |
| 5.5 Is exposure categorised based on biological mechanism of action and taking into account the pharmacokinetics and pharmacodynamics of the drug?                                                  | <input type="checkbox"/>            | <input checked="" type="checkbox"/> | <input type="checkbox"/> |                       |
| 5.6 Is (are) (an) appropriate comparator(s) identified?                                                                                                                                             | <input checked="" type="checkbox"/> | <input type="checkbox"/>            | <input type="checkbox"/> | p. 9                  |

Comments:

|  |
|--|
|  |
|--|

| <b>Section 6: Outcome definition and measurement</b>                                                                                                                                                                     | <b>Yes</b>                          | <b>No</b>                | <b>N/A</b>                          | <b>Section Number</b> |
|--------------------------------------------------------------------------------------------------------------------------------------------------------------------------------------------------------------------------|-------------------------------------|--------------------------|-------------------------------------|-----------------------|
| 6.1 Does the protocol specify the primary and secondary (if applicable) outcome(s) to be investigated?                                                                                                                   | <input checked="" type="checkbox"/> | <input type="checkbox"/> | <input type="checkbox"/>            | p. 10                 |
| 6.2 Does the protocol describe how the outcomes are defined and measured?                                                                                                                                                | <input checked="" type="checkbox"/> | <input type="checkbox"/> | <input type="checkbox"/>            | p. 10                 |
| 6.3 Does the protocol address the validity of outcome measurement? (e.g. precision, accuracy, sensitivity, specificity, positive predictive value, use of validation sub-study)                                          | <input checked="" type="checkbox"/> | <input type="checkbox"/> | <input type="checkbox"/>            | p. 10                 |
| 6.4 Does the protocol describe specific outcomes relevant for Health Technology Assessment? (e.g. HRQoL, QALYs, DALYs, health care services utilisation, burden of disease or treatment, compliance, disease management) | <input type="checkbox"/>            | <input type="checkbox"/> | <input checked="" type="checkbox"/> |                       |

1  
2  
3  
4  
5  
6  
7  
8  
9  
10  
11  
12  
13  
14  
15  
16  
17  
18  
19  
20  
21  
22  
23  
24  
25  
26  
27  
28  
29  
30  
31  
32  
33  
34  
35  
36  
37  
38  
39  
40  
41  
42  
43  
44  
45  
46  
47  
48  
49  
50  
51  
52  
53  
54  
55  
56  
57  
58  
59  
60

Comments:

|  |
|--|
|  |
|--|

| <b>Section 7: Bias</b>                                                                                               | <b>Yes</b>                          | <b>No</b>                | <b>N/A</b>               | <b>Section Number</b> |
|----------------------------------------------------------------------------------------------------------------------|-------------------------------------|--------------------------|--------------------------|-----------------------|
| 7.1 Does the protocol address ways to measure confounding? (e.g. confounding by indication)                          | <input checked="" type="checkbox"/> | <input type="checkbox"/> | <input type="checkbox"/> | p. 13                 |
| 7.2 Does the protocol address selection bias? (e.g. healthy user/adherer bias)                                       | <input checked="" type="checkbox"/> | <input type="checkbox"/> | <input type="checkbox"/> | p.16                  |
| 7.3 Does the protocol address information bias? (e.g. misclassification of exposure and outcomes, time-related bias) | <input checked="" type="checkbox"/> | <input type="checkbox"/> | <input type="checkbox"/> | p.16                  |

Comments:

|  |
|--|
|  |
|--|

| <b>Section 8: Effect measure modification</b>                                                                                                            | <b>Yes</b>                          | <b>No</b>                | <b>N/A</b>               | <b>Section Number</b> |
|----------------------------------------------------------------------------------------------------------------------------------------------------------|-------------------------------------|--------------------------|--------------------------|-----------------------|
| 8.1 Does the protocol address effect modifiers? (e.g. collection of data on known effect modifiers, sub-group analyses, anticipated direction of effect) | <input checked="" type="checkbox"/> | <input type="checkbox"/> | <input type="checkbox"/> | p. 13                 |

Comments:

|  |
|--|
|  |
|--|

| <b>Section 9: Data sources</b>                                                                                                                                           | <b>Yes</b>                          | <b>No</b>                | <b>N/A</b>               | <b>Section Number</b> |
|--------------------------------------------------------------------------------------------------------------------------------------------------------------------------|-------------------------------------|--------------------------|--------------------------|-----------------------|
| 9.1 Does the protocol describe the data source(s) used in the study for the ascertainment of:                                                                            |                                     |                          |                          |                       |
| 9.1.1 Exposure? (e.g. pharmacy dispensing, general practice prescribing, claims data, self-report, face-to-face interview)                                               | <input checked="" type="checkbox"/> | <input type="checkbox"/> | <input type="checkbox"/> | p. 9                  |
| 9.1.2 Outcomes? (e.g. clinical records, laboratory markers or values, claims data, self-report, patient interview including scales and questionnaires, vital statistics) | <input checked="" type="checkbox"/> | <input type="checkbox"/> | <input type="checkbox"/> | p. 10                 |
| 9.1.3 Covariates and other characteristics?                                                                                                                              | <input checked="" type="checkbox"/> | <input type="checkbox"/> | <input type="checkbox"/> | p. 13                 |
| 9.2 Does the protocol describe the information available from the data source(s) on:                                                                                     |                                     |                          |                          |                       |
| 9.2.1 Exposure? (e.g. date of dispensing, drug quantity, dose, number of days of supply prescription, daily dosage, prescriber)                                          | <input checked="" type="checkbox"/> | <input type="checkbox"/> | <input type="checkbox"/> | p. 9                  |
| 9.2.2 Outcomes? (e.g. date of occurrence, multiple event, severity measures related to event)                                                                            | <input checked="" type="checkbox"/> | <input type="checkbox"/> | <input type="checkbox"/> | p. 10                 |
| 9.2.3 Covariates and other characteristics? (e.g. age, sex, clinical and drug use history, co-morbidity, co-medications, lifestyle)                                      | <input checked="" type="checkbox"/> | <input type="checkbox"/> | <input type="checkbox"/> | p. 13                 |
| 9.3 Is a coding system described for:                                                                                                                                    |                                     |                          |                          |                       |
| 9.3.1 Exposure? (e.g. WHO Drug Dictionary, Anatomical Therapeutic Chemical (ATC) Classification System)                                                                  | <input checked="" type="checkbox"/> | <input type="checkbox"/> | <input type="checkbox"/> | p.50                  |
| 9.3.2 Outcomes? (e.g. International Classification of Diseases (ICD), Medical Dictionary for Regulatory Activities (MedDRA))                                             | <input checked="" type="checkbox"/> | <input type="checkbox"/> | <input type="checkbox"/> | p.50                  |
| 9.3.3 Covariates and other characteristics?                                                                                                                              | <input checked="" type="checkbox"/> | <input type="checkbox"/> | <input type="checkbox"/> | p. 51                 |

| <b>Section 9: Data sources</b>                                                                       | <b>Yes</b>               | <b>No</b>                | <b>N/A</b>                          | <b>Section Number</b> |
|------------------------------------------------------------------------------------------------------|--------------------------|--------------------------|-------------------------------------|-----------------------|
| 9.4 Is a linkage method between data sources described? (e.g. based on a unique identifier or other) | <input type="checkbox"/> | <input type="checkbox"/> | <input checked="" type="checkbox"/> |                       |

Comments:

| <b>Section 10: Analysis plan</b>                                                       | <b>Yes</b>                          | <b>No</b>                           | <b>N/A</b>                          | <b>Section Number</b> |
|----------------------------------------------------------------------------------------|-------------------------------------|-------------------------------------|-------------------------------------|-----------------------|
| 10.1 Are the statistical methods and the reason for their choice described?            | <input checked="" type="checkbox"/> | <input type="checkbox"/>            | <input type="checkbox"/>            | p. 8, 12, 17          |
| 10.2 Is study size and/or statistical precision estimated?                             | <input checked="" type="checkbox"/> | <input type="checkbox"/>            | <input type="checkbox"/>            | p. 13, 14             |
| 10.3 Are descriptive analyses included?                                                | <input checked="" type="checkbox"/> | <input type="checkbox"/>            | <input type="checkbox"/>            | p.11                  |
| 10.4 Are stratified analyses included?                                                 | <input type="checkbox"/>            | <input checked="" type="checkbox"/> | <input type="checkbox"/>            |                       |
| 10.5 Does the plan describe methods for analytic control of confounding?               | <input checked="" type="checkbox"/> | <input type="checkbox"/>            | <input type="checkbox"/>            | p. 16, 17             |
| 10.6 Does the plan describe methods for analytic control of outcome misclassification? | <input checked="" type="checkbox"/> | <input type="checkbox"/>            | <input type="checkbox"/>            | p. 13                 |
| 10.7 Does the plan describe methods for handling missing data?                         | <input type="checkbox"/>            | <input type="checkbox"/>            | <input checked="" type="checkbox"/> |                       |
| 10.8 Are relevant sensitivity analyses described?                                      | <input checked="" type="checkbox"/> | <input type="checkbox"/>            | <input type="checkbox"/>            | p. 13                 |

Comments:

| <b>Section 11: Data management and quality control</b>                                                                                                    | <b>Yes</b>                          | <b>No</b>                | <b>N/A</b>                          | <b>Section Number</b> |
|-----------------------------------------------------------------------------------------------------------------------------------------------------------|-------------------------------------|--------------------------|-------------------------------------|-----------------------|
| 11.1 Does the protocol provide information on data storage? (e.g. software and IT environment, database maintenance and anti-fraud protection, archiving) | <input checked="" type="checkbox"/> | <input type="checkbox"/> | <input type="checkbox"/>            | p. 14                 |
| 11.2 Are methods of quality assurance described?                                                                                                          | <input type="checkbox"/>            | <input type="checkbox"/> | <input checked="" type="checkbox"/> |                       |
| 11.3 Is there a system in place for independent review of study results?                                                                                  | <input checked="" type="checkbox"/> | <input type="checkbox"/> | <input type="checkbox"/>            | p. 14                 |

Comments:

| <b>Section 12: Limitations</b>                                                                                                                                                    | <b>Yes</b>                          | <b>No</b>                | <b>N/A</b>               | <b>Section Number</b> |
|-----------------------------------------------------------------------------------------------------------------------------------------------------------------------------------|-------------------------------------|--------------------------|--------------------------|-----------------------|
| 12.1 Does the protocol discuss the impact on the study results of:                                                                                                                |                                     |                          |                          |                       |
| 12.1.1 Selection bias?                                                                                                                                                            | <input checked="" type="checkbox"/> | <input type="checkbox"/> | <input type="checkbox"/> | p. 15-16              |
| 12.1.2 Information bias?                                                                                                                                                          | <input checked="" type="checkbox"/> | <input type="checkbox"/> | <input type="checkbox"/> | p. 15-16              |
| 12.1.3 Residual/unmeasured confounding? (e.g. anticipated direction and magnitude of such biases, validation sub-study, use of validation and external data, analytical methods). | <input checked="" type="checkbox"/> | <input type="checkbox"/> | <input type="checkbox"/> | p. 16                 |

| <b><u>Section 12: Limitations</u></b>                                                                                                                                                         | <b>Yes</b>                          | <b>No</b>                | <b>N/A</b>               | <b>Section Number</b> |
|-----------------------------------------------------------------------------------------------------------------------------------------------------------------------------------------------|-------------------------------------|--------------------------|--------------------------|-----------------------|
| 12.2 Does the protocol discuss study feasibility?<br>(e.g. study size, anticipated exposure uptake, duration of follow-up in a cohort study, patient recruitment, precision of the estimates) | <input checked="" type="checkbox"/> | <input type="checkbox"/> | <input type="checkbox"/> | p. 13                 |

Comments:

| <b><u>Section 13: Ethical/data protection issues</u></b>                               | <b>Yes</b>                          | <b>No</b>                | <b>N/A</b>                          | <b>Section Number</b> |
|----------------------------------------------------------------------------------------|-------------------------------------|--------------------------|-------------------------------------|-----------------------|
| 13.1 Have requirements of Ethics Committee/ Institutional Review Board been described? | <input checked="" type="checkbox"/> | <input type="checkbox"/> | <input type="checkbox"/>            | p. 14                 |
| 13.2 Has any outcome of an ethical review procedure been addressed?                    | <input type="checkbox"/>            | <input type="checkbox"/> | <input checked="" type="checkbox"/> |                       |
| 13.3 Have data protection requirements been described?                                 | <input checked="" type="checkbox"/> | <input type="checkbox"/> | <input type="checkbox"/>            | p. 14                 |

Comments:

| <b><u>Section 14: Amendments and deviations</u></b>                             | <b>Yes</b>               | <b>No</b>                | <b>N/A</b>                          | <b>Section Number</b> |
|---------------------------------------------------------------------------------|--------------------------|--------------------------|-------------------------------------|-----------------------|
| 14.1 Does the protocol include a section to document amendments and deviations? | <input type="checkbox"/> | <input type="checkbox"/> | <input checked="" type="checkbox"/> |                       |

Comments:

| <b><u>Section 15: Plans for communication of study results</u></b>                          | <b>Yes</b>                          | <b>No</b>                | <b>N/A</b>               | <b>Section Number</b> |
|---------------------------------------------------------------------------------------------|-------------------------------------|--------------------------|--------------------------|-----------------------|
| 15.1 Are plans described for communicating study results (e.g. to regulatory authorities)?  | <input checked="" type="checkbox"/> | <input type="checkbox"/> | <input type="checkbox"/> | p. 14                 |
| 15.2 Are plans described for disseminating study results externally, including publication? | <input checked="" type="checkbox"/> | <input type="checkbox"/> | <input type="checkbox"/> | p. 14                 |

Comments:

Name of the main author of the protocol: BERTHE Pauline

Date: 07/12/2021

Signature: \_\_\_\_\_

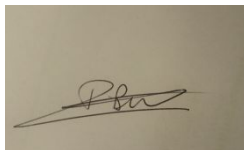

# BMJ Open

## Oral Janus kinase inhibitors and venous thromboembolic events in atopic dermatitis: protocols for a case-time control study and a nested case-control study based on the French national health insurance (SNDS) cohort.

|                                 |                                                                                                                                                                                                                                                                                                                                                                                                                                                                                                                                                                                                        |
|---------------------------------|--------------------------------------------------------------------------------------------------------------------------------------------------------------------------------------------------------------------------------------------------------------------------------------------------------------------------------------------------------------------------------------------------------------------------------------------------------------------------------------------------------------------------------------------------------------------------------------------------------|
| Journal:                        | <i>BMJ Open</i>                                                                                                                                                                                                                                                                                                                                                                                                                                                                                                                                                                                        |
| Manuscript ID                   | bmjopen-2021-059979.R1                                                                                                                                                                                                                                                                                                                                                                                                                                                                                                                                                                                 |
| Article Type:                   | Protocol                                                                                                                                                                                                                                                                                                                                                                                                                                                                                                                                                                                               |
| Date Submitted by the Author:   | 07-Apr-2022                                                                                                                                                                                                                                                                                                                                                                                                                                                                                                                                                                                            |
| Complete List of Authors:       | BERTHE, Pauline; CHU Rennes, Scailteux, Lucie-Marie ; CHU Rennes, Pharmacovigilance and Pharmacoepidemiology<br>Lescoat, Alain; CHU Rennes, Internal Medicine & Clinical Immunology<br>STAUMONT, DELPHINE; CHU Lille, Department of Dermatology<br>Coiffier, Guillaume; CH Dinan, Guéret, Pierre; CHU Rennes<br>Dupuy, Alain; Dermatology, Rennes Hospital, Rennes, France<br>Oger, Emmanuel; CHU Rennes<br>Droitcourt, Catherine; Centre Hospitalier Universitaire de Rennes, Department of Dermatology; Université de Rennes 1, EA 7449 REPERES<br>Pharmacoepidemiology and Health Services Research |
| <b>Primary Subject Heading</b>: | Dermatology                                                                                                                                                                                                                                                                                                                                                                                                                                                                                                                                                                                            |
| Secondary Subject Heading:      | Epidemiology, Pharmacology and therapeutics                                                                                                                                                                                                                                                                                                                                                                                                                                                                                                                                                            |
| Keywords:                       | Adult dermatology < DERMATOLOGY, Eczema < DERMATOLOGY, Thromboembolism < CARDIOLOGY, Risk management < HEALTH SERVICES ADMINISTRATION & MANAGEMENT, CLINICAL PHARMACOLOGY                                                                                                                                                                                                                                                                                                                                                                                                                              |
|                                 |                                                                                                                                                                                                                                                                                                                                                                                                                                                                                                                                                                                                        |

SCHOLARONE™  
Manuscripts



**Title:** Oral Janus kinase inhibitors and venous thromboembolic events in atopic dermatitis: protocols for a case-time control study and a nested case-control study based on the French national health insurance (SNDS) cohort.

**Authors:** Pauline Berthe<sup>1</sup>, MD; Lucie-Marie Scailteux<sup>2,3</sup>, PharmD, PhD; Alain Lescoat<sup>4,5</sup>, MD, PhD; Delphine Staumont-Sallé<sup>6,7</sup>, MD, PhD; Guillaume Coiffier<sup>8,9</sup>, MD; Pierre Guéret<sup>10</sup>, MD, PhD; Alain Dupuy<sup>1,2</sup>, MD, PhD; Emmanuel Oger<sup>2,3</sup>, MD, PhD; Catherine Droitcourt<sup>1,2</sup> MD, PhD.

<sup>1</sup>Department of Dermatology, CHU Rennes, F-35000 Rennes, France

<sup>2</sup>University of Rennes, EA 7449 REPERES “Pharmacoepidemiology and Health Services Research”, F-35000 Rennes, France

<sup>3</sup>Pharmacovigilance, Pharmacoepidemiology and Drug Information Centre, Department of Clinical Pharmacology, Rennes University Hospital, F-35000 Rennes, France

<sup>4</sup>Department of Internal Medicine and Clinical Immunology, CHU Rennes, F-35000 Rennes, France

<sup>5</sup>University of Rennes, CHU Rennes, Inserm, EHESP, Irset (Institut de recherche en santé, environnement et travail) - UMR\_S 1085, F-35000Rennes, France

<sup>6</sup>Department of Dermatology, CHU Lille, F-59000 Lille, France

<sup>7</sup>University of Lille, U1286 Inserm INFINITE (Institute for Translational Research in Inflammation), F-59000 Lille, France

<sup>8</sup>Department of Rheumatology, CH Dinan, F-22100 Dinan, France

<sup>9</sup>Department of Rheumatology, CHU Rennes, INSERM, INRA, Institut NUMECAN (Nutrition Metabolism and Cancer), F-35000Rennes, France

<sup>10</sup>Haemostasis Department, CHU Rennes, F-35000 Rennes, France

**Corresponding author:** Dr Pauline BERTHE, Department of Dermatology, Pontchaillou Hospital, 2 rue Henri le Guilloux, F-35000 Rennes, France, Tel: + 33-299-284-349, Fax: + 33-299-284-100, E-mail: pauline.berthe@chu-rennes.fr

Manuscript word count: 4372/4000

Abstract word count: 300/300

References: 80

1  
2  
3 Figures: 3  
4

5 Tables: 3  
6

7 Supplementary materials: 2  
8

9 **Attachments:** ENCePP checklist for study protocols, RECORD checklist  
10

11 **Funding sources:** This research did not receive any specific funding from agencies or  
12 organizations in the public, commercial, or not-for-profit sectors.  
13

14 **Conflicts of Interest:** None with regard to the present work.  
15

16 **Keywords:** JAK inhibitor, venous thromboembolic event, health insurance database  
17  
18  
19  
20  
21  
22  
23  
24  
25  
26  
27  
28  
29  
30  
31  
32  
33  
34  
35  
36  
37  
38  
39  
40  
41  
42  
43  
44  
45  
46  
47  
48  
49  
50  
51  
52  
53  
54  
55  
56  
57  
58  
59  
60

**Abbreviations**

Ankylosing spondylitis (AS)

Atopic dermatitis (AD)

Anatomical Therapeutic Chemical (ATC)

Confidence interval (CI)

Crohn's disease (CD)

European Medicines Agency (EMA)

Incidence rate (IR)

International Classification of Diseases, 10th Revision (ICD-10)

Odds ratio (OR)

Psoriatic arthritis (PsA)

Rheumatoid arthritis (RA)

Signal transducer and activator of transcription (STAT)

Système National des Données de Santé (SNDS)

Ulcerative colitis (UC)

Venous thromboembolic event (VTE)

## **Abstract**

### ***Introduction:***

Atopic dermatitis (AD) is a highly prevalent, chronic, inflammatory skin disease. Several orally administered Janus kinase inhibitors (JAKis, including baricitinib, upadacitinib and abrocitinib) have received a marketing authorization for AD.

Clinical trials in rheumatoid arthritis (RA) have flagged up a potential risk of JAKi-induced venous thromboembolic events (VTEs). Accordingly, the summary of product characteristics for a JAKi must mention VTEs as potential adverse drug reactions. In contrast to RA, AD per se is not associated with an elevated risk of VTEs. Assessing this potential risk among AD patients would shed further light on the putative underlying relationship between JAKis and VTEs.

Our objective is to investigate the association between JAKi prescribed for AD and VTEs, using data from the French national health insurance system between 2017 and 2025. We will address two research questions: (i) is the risk of VTEs higher in adults with AD exposed to JAKis than in AD adults not exposed to JAKis, and (ii) does the initiation of treatment with a JAKi trigger VTEs?"

### ***Methods and analysis:***

Hence, we have designed (i) a nested case-control study and (ii) a case-time-control study in a cohort of adults with AD with data from the French national health insurance system (2017-2025).

Here, we describe the study protocol, our methodological choices, and certain novel aspects - including the combined value of the two assumptions, and the use of an exhaustive national health insurance database with potentially greater statistical power for studying rare events in the population of AD patients at a low risk of VTEs (thus limiting the influence of confounding factors).

### ***Ethics and dissemination:***

The protocol has been approved by an independent ethics committee and registered with the French National Data Protection Commission. The study's findings will be published in peer-reviewed scientific journals and presented at international conferences.

### Article Summary: strengths and limitations of this study

A population-based study using the exhaustive French national health insurance database would provide additional insight into the risk of venous thromboembolic events (VTEs). Advantageously, this nationwide study should be able to exhaustively identify VTEs, the time of their occurrence, and prescriptions of JAK inhibitors.

By studying atopic dermatitis (AD), we hope to avoid a major source of confounding bias; in contrast to rheumatoid arthritis, AD is not associated *per se* with an elevated risk of VTEs.

The limitations of this study protocol (based on the use of French national health insurance database) include a lack of data on certain risk factors for VTEs (including obesity and a family history of thromboembolic disease) and a potential lack of statistical power.

## INTRODUCTION

Atopic dermatitis (AD) is a highly prevalent, pruritic, inflammatory disease skin that occurs in both adults (3 to 10%) (1–3) and children (15 to 20%) (1,4,5). Approximately 2 to 8% of adults with AD have severe forms; the associated impairments in quality of life make AD a disabling disease. Severe AD is frequently associated with other atopic comorbidities (e.g. asthma, allergic rhinitis, allergic conjunctivitis, and food allergy), and may be associated with psychiatric disorders.

The European guidelines on the management of AD in adults recommend first-line treatment with topical anti-inflammatory drugs (topical corticosteroids and tacrolimus) and then (if the treatment fails) systemic immunosuppressants (6,7). In late 2017, the management of treatment-refractory AD was revolutionized by the marketing of the first biologic drug, dupilumab (a subcutaneously administered monoclonal antibody against the interleukin -4 and -13 receptors) (8,9). Other systemic treatments have since received (or are awaiting) marketing authorization: baricitinib (an orally administered Janus kinase (Jak) 1 and 2 inhibitor (JAKi) (10–13), upadacitinib (an orally administered JAK1 inhibitor) (14–16), abrocitinib (another orally administered JAK1 inhibitor) (17–19), and tralokinumab (a subcutaneously administered anti-interleukin-13 monoclonal antibody) (20,21).

JAKis constitute a new family of orally administered molecules that target the JAK-signal transducer and activator of transcription (STAT) pathway. Janus kinases are involved in the transduction of intracellular signals in response to various cytokines and growth factors involved in haematopoiesis, inflammation, and immune functions.

In the European Union, baricitinib was approved for the treatment of active, moderate-to-severe rheumatoid arthritis (RA) in adults in 2017 and for moderate-to-severe AD in adults who are candidates for systemic drug treatment in 2021. Upadacitinib was approved for the treatment of adults with moderate-to-severe active RA, psoriatic arthritis (PsA), or ankylosing spondylitis (AS) in 2020 and 2021 and for the treatment of moderate-to-severe AD in adults and adolescents (aged 12 or over) who are candidates for systemic drug treatment in August 2021. Lastly, abrocitinib was approved very recently by the European Medicines Agency (EMA) for the systemic treatment of moderate-to-severe AD in adults and adolescents.

Clinical trials in RA have flagged up a potential risk of JAKi-induced venous thromboembolic events (VTEs, including deep vein thrombosis and pulmonary embolism) (22–26). Although the EMA approved low (2 mg) and high (4 mg) doses of baricitinib, the FDA only approved the 2 mg dose because of the VTE risk. On a broader scale, the summary of product

1  
2  
3 characteristics for a JAKi must mention VTEs as potential adverse drug reactions. The safety  
4 profiles of baricitinib and upadacitinib in patients with RA have been described in nine and five  
5 clinical studies, respectively. The estimated incidence of VTEs ranged from 0.3 to 0.6 per 100  
6 person-years (22,27).  
7  
8  
9

10 Due to the presence of systemic inflammation, RA *per se* can induce thromboembolic events,  
11 and the treatment of RA with anti-inflammatory drugs helps to reduce the cardiovascular and  
12 thromboembolic risk (25,28). Furthermore, most patients with RA are aged over 50 at diagnosis  
13 and have higher prevalence of obesity and a higher incidence of VTEs. In this case, the interplay  
14 between RA, JAKis and thromboembolic risk is particularly difficult to characterize.  
15  
16  
17  
18

19 The pathogenic links between JAKis and a potentially greater risk of thromboembolic disease  
20 are poorly understood, and the literature data are contradictory. The potential thromboembolic  
21 risk might be related to an imbalance between pro and anti-thrombotic signals, including the  
22 inhibition of pro-inflammatory signals (such as interferon-dependant pathways) and the  
23 paradoxical inhibition of JAK-STAT-dependant anti-inflammatory pathways (such as the IL-  
24 10 pathway that helps to limit clot formation under normal conditions) (29,30). JAKis that  
25 influence JAK2-dependent signalling (such as baricitinib) might also promote platelet  
26 formation from megakaryocytes, as evidenced by a transient increase in the platelet count  
27 following JAKi initiation. Nonetheless, a causal link between transient thrombocytosis and  
28 VTE has never been proven (22).  
29  
30  
31  
32  
33  
34  
35

36 The results of meta-analyses of the links between JAKis and the risk of thromboembolic and/or  
37 cardiovascular events are summarized in Table 1 (31–37).  
38  
39  
40  
41  
42  
43  
44  
45  
46  
47  
48  
49  
50  
51  
52  
53  
54  
55  
56  
57  
58  
59  
60

**Table 1: List of meta-analyses on the risk of VTEs during treatment with JAKis**

| First Author         | Date of publication | JAK inhibitor                                                                             | Indication                                                      | Number of studies included | Type of studies included | Number of patients included | Median follow-up (weeks)                                    | Number of events among exposed participants | Number of events among nonexposed participants | Results OR (95%CI)                                                                                                                                                                                                             | Methods used                                                                                        |
|----------------------|---------------------|-------------------------------------------------------------------------------------------|-----------------------------------------------------------------|----------------------------|--------------------------|-----------------------------|-------------------------------------------------------------|---------------------------------------------|------------------------------------------------|--------------------------------------------------------------------------------------------------------------------------------------------------------------------------------------------------------------------------------|-----------------------------------------------------------------------------------------------------|
| Xie (31)             | 2019                | Tofacitinib<br>Baricitinib<br>Upadacitinib<br>Peficitinib<br>Decernotinib                 | RA                                                              | 26                         | RCT                      | 11799                       | Placebo-controlled period: 12<br>Dose-comparison period: 24 | 12                                          | 3                                              | All JAKis: 1.16 (0.48-2.81)<br>Tofacitinib: 0.17 (0.03-1.05)<br>Baricitinib: 2.33 (0.62-8.75)<br>Upadacitinib: 1.77 (0.20-16.00)                                                                                               | Mantel-Haenszel fixed-effect method                                                                 |
| Xie (32)             | 2019                | Tofacitinib                                                                               | RA, PsA, CPP, UC, CD, AS                                        | 27                         | RCT                      | 13611                       | Placebo-controlled period: 12<br>Dose-comparison period: 24 | 1                                           | 5                                              | 0.03 (0.00-0.21)                                                                                                                                                                                                               | Peto method                                                                                         |
| Olivera (33)         | 2020                | Tofacitinib<br>Upadacitinib<br>Filgotinib<br>Baricitinib                                  | RA, AS, UC, CD, CPP                                             | 10                         | RCT Cohorts              | 5143                        | 26                                                          | 12                                          | 3                                              | All JAKis: 0.90 (0.32-2.54)                                                                                                                                                                                                    | Random-effects model                                                                                |
| Giménez Poderos (34) | 2020                | Tofacitinib<br>Baricitinib                                                                | RA, KT, UC, CPP, CD, PsA, AD, DKD, SLE, JIA, SS                 | 59                         | RCT Cohorts              | 25947                       | 16                                                          | 24                                          | 23                                             | Tofacitinib: 0.29 (0.10-0.84)<br>Baricitinib: 3.39 (0.82-14.04)                                                                                                                                                                | Fixed-effects or random-effects model, with application of the most conservative model in each case |
| Yates (35)           | 2020                | Tofacitinib<br>Baricitinib<br>Upadacitinib<br>Filgotinib                                  | RA, PsA, AS, UC, CD, CPP                                        | 42                         | RCT                      | 17269                       | unavailable                                                 | 15                                          | 4                                              | All JAKis: 0.68 (0.36-1.29)                                                                                                                                                                                                    | Mantel-Haenszel fixed-effect method                                                                 |
| Wang (36)            | 2020                | Upadacitinib                                                                              | RA                                                              | 3                          | RCT                      | 2852                        | unavailable                                                 | 3                                           | 1                                              | 2.34 (0.15-15.02)                                                                                                                                                                                                              | Random-effects model                                                                                |
| Bilal (37)           | 2021                | Abrocitinib, Baricitinib, Decernotinib, Filgotinib, Peficitinib, Ruxolitinib, Tofacitinib | RA, AD, SLE, CPP, AS, PsA, UC, Pancreatic cancer, Breast cancer | 29                         | RCT                      | 13910                       | 48                                                          | 50                                          | 27                                             | All JAKis: 0.91 (0.57-1.47)<br>Baricitinib: 1.12 (0.27-4.69)<br>Decernotinib: 1.07 (0.18-6.43)<br>Filgotinib: 2.13 (0.22-20.64)<br>Ruxolitinib: (0.31-2.29)<br>Upadacitinib: 2.25 (0.55-9.25)<br>Tofacitinib: 0.27 (0.08-0.89) | Random-effects model                                                                                |

Abbreviations: AD, atopic dermatitis; AS, ankylosing spondylarthritis; CD, Crohn's disease; CI, confidence interval; CPP, Chronic Plaque Psoriasis; DKD, diabetic kidney disease; IR, incidence rates; JAKi, Janus kinase inhibitor; JIA, juvenile idiopathic arthritis; KT, kidney transplantation; OR, odds ratio; PsA, psoriatic arthritis; RA, rheumatoid arthritis; RCT, randomized clinical trial; SLE, systemic lupus erythematosus; SS, systemic sclerosis; UC, ulcerative colitis.



1  
2  
3 Most of the meta-analyzed data came from clinical trials, rather than real-life studies with a  
4 longer follow-up period. The meta-analyses concluded that although the JAKi treatment is  
5 associated with an elevated risk of VTEs, the association is not statistically significance. Lastly,  
6 the meta-analyses did not encompass data on VTEs treated in primary care facilities (i.e. on an  
7 outpatient basis). Two analyses of US medical-administrative databases did not find a  
8 difference in the VTE risk between patients with RA taking tofacitinib and those taking an anti-  
9 tumour necrosis factor agent (hazard ratio [95% confidence interval (CI)] = 1.13 [0.77-1.65]  
10 and 1.33 [0.78-2.24], respectively) (38,39). However, the researchers could not rule out such a  
11 risk, and only considered VTEs leading to hospital admission (38,39).

12  
13 A population-based study of a health insurance database (the *Système National des Données de*  
14 *Santé*, SNDS) would provide additional insights by focusing on the VTE risk. The advantages  
15 of studying a health insurance database include the precise, national-level identification of JAKi  
16 prescriptions, VTEs, and the time of occurrence (relative to treatment initiation, for example).  
17 Furthermore, studying AD avoids a major source of confounding bias; in contrast to RA and  
18 inflammatory bowel disease, AD is not associated with an increased risk of VTE (40) and  
19 predominantly affects a younger population with a lower prevalence of concomitant  
20 cardiovascular comorbidities or obesity.

21  
22 Here, we describe the protocol for the “JAK inhibitors and ThromboEmbolic Risk” (JAKTER)  
23 study of the association between JAKis and VTEs in AD, using real-world evidence from an  
24 exhaustive French medical-administrative database. We also discuss our methodological  
25 choices. We will address the following two questions, using two different methodological  
26 approaches: (i) is the risk of VTEs higher in adults with AD exposed to JAKis than in adults  
27 with AD not exposed to JAKis, and (ii) does the initiation of treatment with a JAKi trigger  
28 VTEs?  
29  
30  
31  
32

## 33 **METHODS AND ANALYSIS**

### 34 **Overall study design**

35  
36 The literature data on the temporal relationship between the initiation of treatment with a JAKi  
37 and the occurrence of a VTE are contradictory. Some studies suggest that the incidence rates of  
38 VTEs are consistent over time (22), whereas other indicate that the incidence rates are clustered  
39 soon after the start of exposure (41). The study null hypotheses are formulated as follows: (i)  
40 VTE risk is equal in adults with AD exposed or not exposed to JAKis, (ii) JAKi initiation does  
41 not trigger VTE. We will therefore use two different methodological approaches to investigate  
42  
43  
44  
45  
46  
47  
48  
49  
50  
51  
52  
53  
54  
55  
56  
57  
58  
59  
60

1  
2  
3 the VTEs and the JAKis prescribed for AD: (i) a nested case-control study in a cohort of adults  
4 with AD (analysis #1) and (ii) a case-time-control study (analysis #2).

5  
6 The overall study design is summarized in Figure 1.  
7  
8  
9

## 10 **Place and study time**

11  
12 The analysis period will run from January 1<sup>st</sup>, 2017, to August 31<sup>st</sup>, 2025, in France.  
13  
14  
15

## 16 **Data sources**

17  
18 We will analyze the French national health insurance database (*Système National des Données*  
19 *de Santé*, SNDS), which covers 98% of the 66 million people in France. The SNDS database  
20 contains anonymous data on individuals' demographic characteristics (sex, dates of birth, and  
21 (if applicable) date of death); all healthcare reimbursements, including drugs (with the  
22 prescription filling date, the prescriber's medical speciality, laboratory tests, outpatient  
23 care/visits, all hospital stays, and the associated diagnoses (coded according to the International  
24 Classification of Diseases, 10<sup>th</sup> Revision (ICD-10), all causes of death (classified according to  
25 the ICD-10 codes), and the attribution or not of "chronic disease" status ("*affection de longue*  
26 *durée*" (ALD), giving entitlement to the full coverage of related healthcare costs, and again  
27 coded according to ICD-10 codes). Information on medical procedures or biological results are  
28 not available in the SNDS.  
29  
30  
31  
32  
33  
34  
35  
36  
37  
38  
39

## 40 **Selection criteria and constitution of the target cohort**

41 To avoid indication bias and form a homogeneous group of patients in terms of medical care,  
42 we will build up a cohort of adults with AD and who start systemic immunomodulatory  
43 treatment for this disease.  
44  
45

46 In France, AD is a chronic condition that is mostly managed in outpatient settings and not  
47 during hospital stays. Furthermore, AD does not give entitlement to ALD chronic disease status.  
48 All eligible adults (aged 18 or over) with *a priori* AD will be identified as follows:  
49  
50

- 51 - adults (aged 18 or over) with an initial fulfilment of a prescription for dupilumab,  
52 cyclosporine, methotrexate, tralokinumab, or a JAKi (baricitinib, upadacitinib, or  
53 abrocitinib), two or more fulfilments of topical corticosteroids, and a consultation with  
54 a dermatologist between January 1<sup>st</sup>, 2017, and December 31<sup>st</sup>, 2024.  
55  
56  
57  
58  
59  
60

- adults with no fulfilments of dupilumab, cyclosporine, methotrexate, tralokinumab or JAKi (baricitinib, upadacitinib, or abrocitinib) prescriptions in the year prior to cohort entry.
- adults with no other indications for dupilumab, cyclosporine, methotrexate, tralokinumab, or the JAKis baricitinib, upadacitinib, or abrocitinib (i.e. RA, PsA, AS, ulcerative colitis, lupus, organ or bone marrow transplant, nephrotic syndrome, and psoriasis) identified through “ALD” chronic disease status or the hospital discharge ICD-10 codes, between January 1<sup>st</sup>, 2016, and December 31<sup>st</sup>, 2024.
- adults with follow-up starting on the date of the first filled prescription of a JAKi (baricitinib, upadacitinib, or abrocitinib), dupilumab, tralokinumab, cyclosporine, or methotrexate, up until August 31<sup>st</sup>, 2025.

## Outcomes

The primary endpoint is VTE; it is a composite endpoint encompassing pulmonary embolism, managed mostly in hospital and identified through hospital discharge ICD-10 code (Table 2), and deep-vein thrombosis managed mostly in an outpatient setting and identified through a dedicated and validated algorithm (manuscript under review). The cases will be adults with AD and incident deep vein thrombosis or pulmonary embolism, managed in an outpatient setting, a hospital, or an emergency department.

The index date is the date of the VTE.

To study cases of “unprovoked” VTEs, we will exclude the following cases of adults with “provoked” VTEs (42):

- initiation of oral oestrogenic contraceptive in the three months before the index date.
- pregnancy (including a two-month postpartum period) before the index date.
- surgery (orthopaedic surgery involving long bones or the pelvis, or other major surgery) in the four weeks before the index date.
- prolonged hospitalisation (>72 hours) in the four weeks before the index date.
- a diagnosis of cancer (including haematological malignancies but not including non-melanoma skin cancer) before the index date.
- fulfilment of one or more prescriptions for preventive or curative treatments with anticoagulants, including heparins, anti-vitamin K agents, and direct oral anticoagulant

(ensuring the exclusion of patients with a history of VTEs and persistent risk factors for VTE recurrence) before the index date (for VTEs managed in hospital or in an emergency department) or before the index date minus 7 days (for adults starting an anticoagulant treatment before hospitalization for VTE).

## Data analysis

The characteristics of the JAKi-treated population of patients with AD will be described, together with the time interval between JAKi initiation and the occurrence of the VTE. We will explore the risk function and the potential time-varying association.

### *Analysis #1: a nested case-control study of a cohort of adults with AD*

The association between exposure to JAKi and the occurrence of VTEs will be investigated in a nested case-control study of a cohort of adults with AD requiring systemic treatment.

Adults with AD will be considered to have been exposed to JAKi if they have at least one fulfilled prescription for a JAKi prior to the index date. Adults with AD will be assigned to a “JAKi user” category or a “JAKi never-user” category, based on the prior fulfilment closest to the index date. Subgroups of JAKi users will be defined as follows: for current JAKi users, the last prescription will have been fulfilled in the month before the index date; for recent JAKi users, the last prescription will have been fulfilled between one and four months before the index date; and for past JAKi users, the last prescription will have been fulfilled more than four months before the index date. Furthermore, for current JAKi users; the number of JAKi prescription fulfilments and the total cumulative dose of JAKi received before the index date will be calculated.

References will be adults with AD whose most recent prescription fulfilment before the index date (regardless of how long before) will have been for another systemic treatment for AD.

For each case (adults with AD having experienced a VTE), four controls will be selected from the target AD cohort. Controls must not have experienced a VTE at the time of their selection. Cases and controls will be matched for age, sex, and length of exposure at the case’s index date. The inclusion and exclusion criteria applied to cases will be applied to the matched controls. It will be possible for a control to become a case after his/her selection (density sampling) (43). We will estimate odds ratios (ORs) using conditional logistic regression. We will consider systemic treatment of AD as a binary variable: JAKi users (baricitinib, upadacitinib, or

1  
2  
3 abrocitinib) vs. users of other systemic drugs (dupilumab, tralokinumab, cyclosporine, or  
4 methotrexate). We will consider drug exposure as a continuous variable. The primary analysis  
5 will compare current JAKi users with JAKi never-users. The secondary analyses will cover  
6 “recent JAKi user” status, “past JAKi user” status, and use of each individual JAKi (baricitinib,  
7 upadacitinib, and abrocitinib). A Schneeweiss diagram for analysis #1 is shown in Figure 2  
8 (44).  
9  
10  
11  
12  
13  
14

15  
16 ***Analysis #2. A case-only design: a nested case-time-control study of a cohort of adults with***  
17 ***AD.***  
18

19 To evaluate whether or not initiation of a JAKi increases the risk of VTE in the following three  
20 months (i.e. a “triggering effect”), we will perform a case-time-control analysis.  
21  
22

23 In the field of pharmacoepidemiology, case-time-control studies can be used to study an acute,  
24 early-onset adverse event during treatment (45). A VTE is sudden (with a short time interval  
25 between the pathophysiological cause and the clinical manifestations) and is easy to date by  
26 screening for specific treatments and additional investigations (including Doppler ultrasound).  
27 The majority of the VTEs observed in clinical trials (22) or reported in pharmacovigilance  
28 databases (41) occurred within three to four months of JAKi initiation (46). Furthermore, the  
29 case-only design can control for potential confounding factors (such as obesity and physical  
30 activity) not recorded in the French health insurance database.  
31  
32  
33  
34  
35  
36

37 Only AD patients exposed to a JAKi and having experienced a VTE (i.e. cases) will be  
38 analyzed. The case-time-control design compares the exposure status immediately before the  
39 event (the risk period) with exposure during a designated (earlier) reference period. Each VTE  
40 case will serve as his/her own control during a comparison of the risk period (0 to 3 months  
41 before occurrence of the VTE) with the reference period (3 to 6 months before occurrence of  
42 the VTE). Each VTE case will be assessed for exposure (yes/no) during the risk period and  
43 during the reference period. Only participants whose status differs when comparing the two  
44 periods (i.e. discordants) will be considered in our estimation of the OR. To take account of the  
45 expected increase in JAKi prescription, the case-time-control analysis will include a selection  
46 of controls matched with VTE cases. Each VTE case will be matched for age and sex with 5  
47 controls without VTEs and who will be randomly selected from the AD target cohort. The date  
48 of the VTE will be used as the index date for the matched controls. The above-defined risk and  
49 reference periods will be screened for JAKi initiation among the controls in the same way as  
50 among the cases, and a case-crossover OR for controls will be computed. The case-time-control  
51  
52  
53  
54  
55  
56  
57  
58  
59  
60

1  
2  
3 OR [95%CI] will be estimated with a conditional logistic model by considering the interaction  
4 term between the exposure of interest (JAKi initiation) and the participant's status (case or  
5 control). The case-time-control OR will correspond to the ratio between the respective case-  
6 crossover ORs obtained in cases and controls.  
7  
8

9  
10 Sensitivity analyses in which the durations of the risk and reference period are modified will be  
11 performed as follows: the risk period will be defined as 0 to 2 months or 0 to 4 months before  
12 the VTE, and the control period will be defined as 2 to 4 months or 4 to 8 months before the  
13 VTE. Furthermore, sensitivity analysis will be performed for analyses #1 and #2 by changing  
14 the patient selection criteria and excluding patients with asthma. Lastly, we shall exclude  
15 patients having initiated oral oestrogenic contraception in the 6 months or the 12 months  
16 before the date of the VTE in cases or the corresponding date in controls.  
17  
18  
19  
20  
21  
22

### 23 24 **Covariates**

25  
26 We used a directed acyclic graph (Figure 3) to describe covariates, mediators, and potential  
27 confounding factors in the relationship between JAKis and VTEs.  
28

29  
30 The results will be adjusted for several covariates, including the patient's chronic comorbidities  
31 (using Bannay et al.'s algorithm for use of the Charlson Comorbidity Index with an electronic  
32 healthcare database (47,48)) and the use of statins (49) or systemic corticosteroids (50). Obesity  
33 is either not documented or only partially documented in the SNDS database; in Europe, most  
34 adults with AD are not obese (51). The case-only design approach (analysis #2) avoids this  
35 potential confounding factor, since the patient is his/her own control. The SNDS database does  
36 not contain identifiable information on a family history of venous thromboembolic disease.  
37  
38

39  
40 Asthma (the most important atopic comorbidity in AD) will be assessed and defined as follows:  
41 an ICD-10 code J45-J46 and/or at least two fulfilments of a drug for the treatment of obstructive  
42 airway diseases (an Anatomical Therapeutic Chemical (ATC) code of R03). The study variables  
43 are listed in Table 2.  
44  
45  
46  
47  
48  
49  
50  
51  
52  
53  
54  
55  
56  
57  
58  
59  
60

**Table 2: List of variables**

| Variables                                        | Registry     | Code                                                                                                                                                                                                                                                                                                                                                  |
|--------------------------------------------------|--------------|-------------------------------------------------------------------------------------------------------------------------------------------------------------------------------------------------------------------------------------------------------------------------------------------------------------------------------------------------------|
| <b>Atopic dermatitis</b>                         |              |                                                                                                                                                                                                                                                                                                                                                       |
| Atopic dermatitis                                | PMSI         | ICD-10 code L20                                                                                                                                                                                                                                                                                                                                       |
| Topical corticosteroids                          | DCIR         | ATC codes D07AB01, D07AB02, D07AB03, D07AB04, D07AB05, D07AB06, D07AB07, D07AB08, D07AB09, D07AB10, D07AB11, D07AB19, D07AB21, D07AB30, D07AC01, D07AC02, D07AC03, D07AC04, D07AC05, D07AC06, D07AC07, D07AC08, D07AC09, D07AC10, D07AC11, D07AC12, D07AC13, D07AC14, D07AC15, D07AC16, D07AC17, D07AC18, D07AC19, D07AC20, D07AC21, D07AD01, D07AD02 |
| Consultation with a dermatologist                | DCIR         | PFS SPE COD or PFE SPE COD code 05                                                                                                                                                                                                                                                                                                                    |
| <b>Exposure</b>                                  |              |                                                                                                                                                                                                                                                                                                                                                       |
| Baricitinib                                      | DCIR         | ATC code L04AA37                                                                                                                                                                                                                                                                                                                                      |
| Upadacitinib                                     | DCIR         | ATC code L04AA44                                                                                                                                                                                                                                                                                                                                      |
| Abrocitinib                                      | DCIR         | ATC code D11AH08                                                                                                                                                                                                                                                                                                                                      |
| Dupilumab                                        | DCIR         | ATC code D11AH05                                                                                                                                                                                                                                                                                                                                      |
| Tralokinumab                                     | DCIR         | ATC code D11AH07                                                                                                                                                                                                                                                                                                                                      |
| Cyclosporine                                     | DCIR         | ATC code L04AD01                                                                                                                                                                                                                                                                                                                                      |
| Methotrexate                                     | DCIR         | ATC code L01BA01                                                                                                                                                                                                                                                                                                                                      |
| <b>Venous thromboembolic events</b>              |              |                                                                                                                                                                                                                                                                                                                                                       |
| Venous thromboembolic events                     | PMSI, DCIR   | EPIGETBAM algorithm under submission                                                                                                                                                                                                                                                                                                                  |
| <b>Exclusion criteria</b>                        |              |                                                                                                                                                                                                                                                                                                                                                       |
| Oral oestrogenic                                 | DCIR         | ATC codes G03AA01, G03AA02, G03AA03, G03AA04, G03AA05, G03AA06, G03AA07, G03AA08, G03AA09, G03AA10, G03AA11, G03AA12, G03AA13, G03AA14, G03AA15, G03AA16, G03AB01, G03AB02, G03AB03, G03AB04, G03AB05, G03AB06, G03AB07, G03AB08                                                                                                                      |
| Pregnancy                                        | PMSI         | ICD-10 code Z321                                                                                                                                                                                                                                                                                                                                      |
| Hospital stay >72 hours, with or without surgery | PMSI         | ICD-10 codes                                                                                                                                                                                                                                                                                                                                          |
| Cancer and haematological malignancies           | PMSI         | ICD-10 codes C00 to C43 and C45 to C97, D00 to D03, D05 to D09, D37 to D48, or ALD n°30                                                                                                                                                                                                                                                               |
| Anticoagulant treatment                          | DCIR         | ATC codes B01AA01, B01AA02, B01AA03, B01AA04, B01AA07, B01AA08, B01AA09, B01AA10, B01AA11, B01AA12, B01AB01, B01AB02, B01AB04, B01AB05, B01AB06, B01AB07, B01AB08, B01AB09, B01AB10, B01AB11, B01AB12, B01AB51, B01AE01, B01AE02, B01AE03, B01AE04, B01AE05, B01AE06, B01AE07, B01AF01, B01AF02, B01AF03, B01AX01, B01AX04, B01AX05                   |
| Rheumatoid arthritis                             | PMSI<br>DCIR | ICD-10 codes M069, M0690, M0691, M0692, M0693, M0694, M0695, M0696, M0697, M0698, M0699, M06 or ALD n°22                                                                                                                                                                                                                                              |
| Psoriatic arthritis                              | PMSI<br>DCIR | ICD-10 codes M0700, M0701, M0702, M0703, M0704, M0705, M0706, M0707, M0708, M0709, M072, M0720, M0721, M0722, M0723, M0724, M0725, M0726, M0727, M0728, M0729, M073, M0730, M0734, M0732, M0733, M0734, M0735, M0736, M0737, M0738, M0739                                                                                                             |
| Ulcerative colitis                               | PMSI<br>DCIR | ICD-10 codes K519 or ALD n°24                                                                                                                                                                                                                                                                                                                         |
| Lupus                                            | PMSI<br>DCIR | ICD-10 codes L93, M32 or ALD n°21                                                                                                                                                                                                                                                                                                                     |
| Organ and bone marrow transplants                | PMSI<br>DCIR | ICD-10 codes Z940, Z941, Z942, Z943, Z944, Z945, Z946, Z947, Z948, Z9480, Z94800, Z94801, Z9481, Z9482, Z94802, Z94803, Z94804, Z94809, Z949                                                                                                                                                                                                          |
| Nephrotic syndrome                               | PMSI<br>DCIR | ICD-10 code N04 or ALD n°19                                                                                                                                                                                                                                                                                                                           |
| Psoriasis                                        | PMSI<br>DCIR | ICD-10 code L40, L400, L401, L402, L403, L404, L405, L408, L409                                                                                                                                                                                                                                                                                       |
| Ankylosing spondylitis                           | PMSI         | ICD-10 codes M45, M450, M451, M452, M453, M454, M455, M456, M457, M458, M459 or ALD n°27                                                                                                                                                                                                                                                              |
| <b>Covariates</b>                                |              |                                                                                                                                                                                                                                                                                                                                                       |
| Charlson Comorbidity Index                       | PMSI         | Algorithm developed by Bannay et al. (47)                                                                                                                                                                                                                                                                                                             |
| Systemic corticosteroids                         | DCIR         | ATC codes H02A and H02B                                                                                                                                                                                                                                                                                                                               |
| Asthma                                           | PMSI<br>DCIR | ICD-10 codes J45, J450, J451, J458, J459, J46<br>ATC code R03                                                                                                                                                                                                                                                                                         |
| Statins                                          | DCIR         | ATC codes C10AA, C10B                                                                                                                                                                                                                                                                                                                                 |

Abbreviations: ALD, *affection longue durée* long-term chronic disease status giving entitlement to full coverage of related healthcare costs; ATC, Anatomical Therapeutic Chemical; DCIR, Données de Consommation Inter Régimes; ICD-10, International Classification of Diseases 10th Revision; PMSI, Programme de Médicalisation des Systèmes d'Information.

### Sample size

Based on a frequency of exposure to JAKi among the targeted cohort of 25%, a 1:4 case to control ratio, and a statistical significance threshold of 0.05, the sample sizes required for a power of 80% in a comparison of JAKi exposure in cases vs. controls are as follows: 1836 participants (306 cases and 1530 controls) for detecting an OR of 1.5, 618 participants (103 cases and 515 controls) for detecting an OR of 2, 354 participants (59 cases and 295 controls) for detecting an OR of 2.5, 246 participants (41 cases and 205 controls) for detecting an OR of 3, and 192 participants (32 cases and 160 controls) for detecting an OR of 3.5. These calculations do not take account of matching, which will tend to increase the power in an unknown manner. The estimated power calculation is given in Table 3. A final power calculation will be performed at the end of the study.

**Table 3: Power calculation for analysis #1**

| Frequency of exposure to JAKis in the targeted cohort | Odds ratio | Nominal power | Number of controls | Number of cases | Total number of participants |
|-------------------------------------------------------|------------|---------------|--------------------|-----------------|------------------------------|
| 0.50                                                  | 1.5        | 0.8           | 1275               | 255             | 1530                         |
| 0.50                                                  | 2.0        | 0.8           | 465                | 93              | 558                          |
| 0.50                                                  | 3.0        | 0.8           | 205                | 41              | 246                          |
| 0.25                                                  | 1.5        | 0.8           | 1530               | 306             | 1836                         |
| 0.25                                                  | 2.0        | 0.8           | 515                | 103             | 618                          |
| 0.25                                                  | 2.5        | 0.8           | 295                | 59              | 354                          |
| 0.25                                                  | 3.0        | 0.8           | 205                | 41              | 246                          |
| 0.25                                                  | 3.5        | 0.8           | 160                | 32              | 192                          |

Abbreviations: JAKis, Janus kinase inhibitors

The estimated incidence of thromboembolic diseases in France is one per 1000 per year; approximately 50,000 adults with a follow-up of three years are required. The target population for baricitinib/upadacitinib has been estimated at between 26,500 and 42,500 by the French High Authority for Health (52); this is almost certainly an underestimate, given that courses of treatment with cyclosporine are short.

### Patient and Public Involvement

A patient will join the independent scientific committee and will participate in the discussion of the results. This patient is Stéphanie Mehrand who is the President of the French Eczema



1  
2  
3 Association (<https://www.associationeczema.fr/>). Once the study will be published, patients  
4 with AD who are members of the association will be informed of the results in the form of  
5 newsletter suitable for a non-specialist audience, through the website of the association.  
6  
7  
8  
9

## 10 **ETHICS AND DISSEMINATION**

11  
12 In accordance with French legislation, the protocol has been approved by an independent ethics  
13 committee (*Comité éthique et scientifique pour les recherches, les études et les évaluations*  
14 *dans le domaine de la santé*, Paris, France; reference: 4523600, dated June 17<sup>th</sup>, 2021) and has  
15 been registered with the French National Data Protection Commission (*Commission Nationale*  
16 *de l'Informatique et des Libertés*, Paris, France; reference: 921265, dated June 28<sup>th</sup>, 2021). The  
17 study's findings will be published in peer-reviewed scientific journals and presented at  
18 international conferences  
19  
20  
21  
22  
23

24 The data will be consulted via the French national health insurance system's (*Caisse Nationale*  
25 *de l'Assurance Maladie*) portal; the investigators' access is restricted to the scope of the study.  
26 The data were not extracted from the main database but were analyzed in a dedicated project  
27 area on the server. The investigators will comply with the reference framework applicable to  
28 the SNDS database (as set out in the government act dated March 22<sup>nd</sup>, 2017).  
29  
30  
31  
32

33 The study protocol has been registered at France's Health Data Hub ([www.health-data-hub.fr](http://www.health-data-hub.fr)).  
34 The statistical analysis plan and data management book will now be drafted. The first results  
35 are expected in late 2025. The study's findings will be published in peer-reviewed scientific  
36 journals and presented at international conferences  
37  
38  
39  
40  
41

## 42 **DISCUSSION**

43  
44 A population-based study of a cohort of AD adults documented in the SNDS French national  
45 health insurance database should provide additional insights on the potential association  
46 between VTE and JAKis (baricitinib, upadacitinib, and abrocitinib).  
47  
48  
49

50 There are several possible pathophysiological explanations for an elevated risk of VTE during  
51 treatment with a JAKi. Firstly, the leading hypothesis states that the thrombogenic effect is  
52 related to the thrombocytosis associated with baricitinib use (22). However, a clear time-domain  
53 or quantitative association between the platelet count and the occurrence of VTE has not been  
54 observed (22). Furthermore, elevation of the platelet count is not observed in people treated  
55 with other JAKis, including upadacitinib (53). Secondly, the JAK 2 pathway has an important  
56  
57  
58  
59  
60

1  
2  
3 role in haematopoiesis and might promote VTE. Paradoxically, inhibition of the JAK2 pathway  
4 by JAKis does not account for the occurrence of VTE: in Vaquez disease and essential  
5 thrombocythemia, an activating mutation in JAK 2 increases the risk of arterial and venous  
6 thrombotic events (54). Data from mouse models suggest that JAK V617F expression induces  
7 hypersensitivity to fibrinogen, thrombopoietin, and other endogenous pro-thrombogenic factors  
8 (55).  
9

10  
11  
12  
13 The literature data on the potential risk are contradictory and do not enable a firm conclusion  
14 about the association between JAKis and VTE to be drawn. A false association might result  
15 from methodological bias. For example, selection bias occurs when including patients who have  
16 received several courses of systemic treatment (and so might have more severe disease and a  
17 higher thromboembolic risk) are included in clinical trials (especially in open-label trials in RA)  
18 (22,24). Confounding bias may occur because the disease treated with JAKi is itself associated  
19 with a higher risk of VTE; this is particularly true for RA. Indeed, the thromboembolic risk is  
20 known to be two to three times higher in patients with RA (25) than in the general population  
21 (28,56). The baseline risk also appears to be elevated other systemic inflammatory diseases,  
22 including inflammatory bowel disease (57,58). In contrast, adults managed for moderate-to-  
23 severe AD are not known to have an elevated thromboembolic risk and are also younger than  
24 patients with RA; hence, the baseline risk of VTEs is lower. Published data on this indication  
25 are scarce: the only two meta-analyses included data from four randomized clinical trials  
26 evaluating the efficacy of baricitinib and abrocitinib in AD (34). The lack of a significant  
27 association might have several explanations: (i) a lack of power would apply if the number of  
28 JAKi-exposed patients experiencing a VTE is low; meta-analyses have provided inconclusive  
29 results, due the rarity of the event and the predominant inclusion of clinical trial data; (ii)  
30 insufficient follow-up in clinical trials (given the latency between JAKi initiation and VTE  
31 occurrence); and (iii) a lack of specific detection of VTEs (requiring a targeted initial  
32 assessment and follow-up, and perhaps a longer follow-up period). Lastly, it is unclear whether  
33 the published studies considered only VTEs leading to a hospitalization or, in contrast, all  
34 VTEs. In France, the majority of VTEs are managed in an outpatient setting (59).  
35  
36  
37  
38  
39  
40  
41  
42  
43  
44  
45  
46  
47  
48  
49  
50

51  
52 Our implementation of two complementary methodological approaches should shed more light  
53 on this question. The case-control study is carried out on a population of AD patients with  
54 similar disease severity levels and receiving similar intensities of systemic treatment. This  
55 design assumes that after initiation of a JAKi, the risk of a VTE is constant. The case-time-  
56 control design will be applied to address (i) the assumption whereby a JAKi triggers a VTE,  
57  
58  
59  
60

1  
2  
3 and (ii) the issue of residual confounding factors. This study design is particularly suitable when  
4 the outcome is sudden and easily dated, as is the case here (60–62). The hypothetical triggering  
5 effect is based on (i) the transient thrombocytosis observed with baricitinib early after treatment  
6 initiation (63,64), (ii) pharmacovigilance data from France and North America (41,46), where  
7 more than half of the reported VTEs occurred within 120 days of JAKi initiation (46), and (iii)  
8 the fact that other drugs (such as contraceptives) can trigger VTEs (65–69). An increase over  
9 the study period in the prevalence of JAKi use for AD is expected; the case-time-control design  
10 considers time-trends in the prevalence of exposure that might introduce a confounding effect  
11 in a case-crossover design. We chose to study “unprovoked” VTEs by excluding well-known  
12 risk factors for thromboembolic disease (70), such as cancer (71), surgery (72), immobilisation  
13 (proxy marker: a hospital stay), hospital admission (73), and the initiation of hormone therapy  
14 (74). Furthermore, we will adjust for the Charlson Comorbidity Index, which includes diabetes  
15 (75–78). However, obesity, black ethnicity (79), and a family history of thromboembolic  
16 disease are not documented in the SNDS database, and so we cannot rule out residual  
17 confounding in analysis #1 (the nested case-control study). In analysis #2 (the case-only  
18 design), cases serve as their own controls, which can mitigate the potential confounding factors  
19 (such as diet, smoking, the level of physical activity, and a family history of thromboembolic  
20 disease) not documented in healthcare databases (45,80).

21  
22  
23  
24  
25  
26  
27  
28  
29  
30  
31  
32  
33  
34  
35  
36  
37  
38  
39  
40  
41  
42  
43  
44  
45  
46  
47  
48  
49  
50  
51  
52  
53  
54  
55  
56  
57  
58  
59  
60  
Our study has several potential strengths, including the exhaustive nationwide coverage of the  
French population (thereby enabling an assessment of rare events and providing potentially  
greater statistical power); the theoretical absence of selection bias, given our use of the SNDS  
database; the quality of the recorded data (enabling estimation of the time of occurrence of  
VTEs); the implementation of two complementary methodological approaches; and the  
definitions of outcomes that encompass VTEs managed in out- and inpatient settings.

The study’s potential limitations include the difficulty of tracking all VTEs (the use of an  
algorithm for the identification of inpatient and outpatient diagnoses of VTE in the health  
insurance database is, however, currently being validated); potential information bias on  
hormone therapy, since a proportion of these treatments are not reimbursed and therefore cannot  
be detected in the SNDS; a potential lack of statistical power; and inability to take account of  
some risk factors for VTEs (including obesity, and a family history of thromboembolic disease)  
in the case-control design – although we believe that these potential confounding factors should  
affect cases and controls to the same extent.

## FIGURE AND TABLE LEGENDS

**Figure 1:** Overall study design

**Figure 2:** Schneeweiss diagram for analysis #1 (44)

**Figure 3:** A directed acyclic graph of the relationship between JAKis, AD, and VTEs

**Table 1:** List of meta-analyses on the risk of VTEs during treatment with JAKis

**Table 2:** List of variables

**Table 3:** Power calculation for analysis #1

## STATEMENTS

### Contributorship statement

PB and CD wrote the first draft of the manuscript. PB, LMS, AL, DSS, GC, PG, AD, EO and CD conceived the scoping review and developed the research questions and the search strategy. All authors critically reviewed drafts and edited the manuscript.

### Competing interests

There are no competing interests for any author.

### Funding

There are no funders to report for this submission.

## ACKNOWLEDGMENTS

We would like to thank David Fraser for the English language revision and Stéphanie Mehrand, the President of the French Eczema Association for her contribution to this work.

## REFERENCES

1. Bieber T. Atopic dermatitis. *N Engl J Med*. 3 avr 2008;358(14):1483-94.
2. Silverberg JI, Hanifin JM. Adult eczema prevalence and associations with asthma and other health and demographic factors: a US population-based study. *J Allergy Clin Immunol*. nov 2013;132(5):1132-8.
3. Barbarot S, Auziere S, Gadkari A, Girolomoni G, Puig L, Simpson EL, et al. Epidemiology of atopic dermatitis in adults: Results from an international survey. *Allergy*. juin 2018;73(6):1284-93.
4. Williams H, Robertson C, Stewart A, Ait-Khaled N, Anabwani G, Anderson R, et al. Worldwide variations in the prevalence of symptoms of atopic eczema in the International Study of Asthma and Allergies in Childhood. *J Allergy Clin Immunol*. janv 1999;103(1 Pt 1):125-38.
5. Flohr C, Mann J. New insights into the epidemiology of childhood atopic dermatitis. *Allergy*. janv 2014;69(1):3-16.
6. Wollenberg A, Barbarot S, Bieber T, Christen-Zaech S, Deleuran M, Fink-Wagner A, et al. Consensus-based European guidelines for treatment of atopic eczema (atopic dermatitis) in adults and children: part I. *J Eur Acad Dermatol Venereol JEADV*. mai 2018;32(5):657-82.
7. Wollenberg A, Barbarot S, Bieber T, Christen-Zaech S, Deleuran M, Fink-Wagner A, et al. Consensus-based European guidelines for treatment of atopic eczema (atopic dermatitis) in adults and children: part II. *J Eur Acad Dermatol Venereol JEADV*. juin 2018;32(6):850-78.
8. Blauvelt A, de Bruin-Weller M, Gooderham M, Cather JC, Weisman J, Pariser D, et al. Long-term management of moderate-to-severe atopic dermatitis with dupilumab and concomitant topical corticosteroids (LIBERTY AD CHRONOS): a 1-year, randomised, double-blinded, placebo-controlled, phase 3 trial. *Lancet Lond Engl*. 10 juin 2017;389(10086):2287-303.
9. Simpson EL, Bieber T, Guttman-Yassky E, Beck LA, Blauvelt A, Cork MJ, et al. Two Phase 3 Trials of Dupilumab versus Placebo in Atopic Dermatitis. *N Engl J Med*. 15 déc 2016;375(24):2335-48.
10. Simpson EL, Lacour J-P, Spelman L, Galimberti R, Eichenfield LF, Bissonnette R, et al. Baricitinib in patients with moderate-to-severe atopic dermatitis and inadequate response to topical corticosteroids: results from two randomized monotherapy phase III trials. *Br J Dermatol*. août 2020;183(2):242-55.
11. Simpson EL, Forman S, Silverberg JI, Zirwas M, Maverakis E, Han G, et al. Baricitinib in patients with moderate-to-severe atopic dermatitis: Results from a randomized

- 1  
2  
3 monotherapy phase 3 trial in the United States and Canada (BREEZE-AD5). *J Am Acad Dermatol.* juill 2021;85(1):62-70.
- 4  
5  
6  
7 12. Reich K, Kabashima K, Peris K, Silverberg JI, Eichenfield LF, Bieber T, et al. Efficacy  
8 and Safety of Baricitinib Combined With Topical Corticosteroids for Treatment of  
9 Moderate to Severe Atopic Dermatitis: A Randomized Clinical Trial. *JAMA Dermatol.* 1  
10 déc 2020;156(12):1333-43.
- 11  
12 13. King B, Maari C, Lain E, Silverberg JI, Issa M, Holzwarth K, et al. Extended Safety  
13 Analysis of Baricitinib 2 mg in Adult Patients with Atopic Dermatitis: An Integrated  
14 Analysis from Eight Randomized Clinical Trials. *Am J Clin Dermatol.* mai  
15 2021;22(3):395-405.
- 16  
17 14. Guttman-Yassky E, Teixeira HD, Simpson EL, Papp KA, Pangan AL, Blauvelt A, et al.  
18 Once-daily upadacitinib versus placebo in adolescents and adults with moderate-to-  
19 severe atopic dermatitis (Measure Up 1 and Measure Up 2): results from two replicate  
20 double-blind, randomised controlled phase 3 trials. *Lancet Lond Engl.* 5 juin  
21 2021;397(10290):2151-68.
- 22  
23 15. Reich K, Teixeira HD, de Bruin-Weller M, Bieber T, Soong W, Kabashima K, et al.  
24 Safety and efficacy of upadacitinib in combination with topical corticosteroids in  
25 adolescents and adults with moderate-to-severe atopic dermatitis (AD Up): results from  
26 a randomised, double-blind, placebo-controlled, phase 3 trial. *Lancet Lond Engl.* 5 juin  
27 2021;397(10290):2169-81.
- 28  
29 16. AbbVie. A Phase 3b Multicenter, Randomized, Double-Blind, Double-Dummy, Active  
30 Controlled Study Comparing the Safety and Efficacy of Upadacitinib to Dupilumab in  
31 Adult Subjects With Moderate to Severe Atopic Dermatitis [Internet]. *clinicaltrials.gov*;  
32 2021 juill [cité 5 juill 2021]. Report No.: NCT03738397. Disponible sur:  
33 <https://clinicaltrials.gov/ct2/show/NCT03738397>
- 34  
35  
36  
37 17. Simpson EL, Sinclair R, Forman S, Wollenberg A, Aschoff R, Cork M, et al. Efficacy  
38 and safety of abrocitinib in adults and adolescents with moderate-to-severe atopic  
39 dermatitis (JADE MONO-1): a multicentre, double-blind, randomised, placebo-  
40 controlled, phase 3 trial. *Lancet Lond Engl.* 25 juill 2020;396(10246):255-66.
- 41  
42  
43 18. Silverberg JI, Simpson EL, Thyssen JP, Gooderham M, Chan G, Feeney C, et al.  
44 Efficacy and Safety of Abrocitinib in Patients With Moderate-to-Severe Atopic  
45 Dermatitis: A Randomized Clinical Trial. *JAMA Dermatol.* 1 août 2020;156(8):863-73.
- 46  
47  
48 19. Bieber T, Simpson EL, Silverberg JI, Thaçi D, Paul C, Pink AE, et al. Abrocitinib versus  
49 Placebo or Dupilumab for Atopic Dermatitis. *N Engl J Med.* 25 mars  
50 2021;384(12):1101-12.
- 51  
52 20. Wollenberg A, Blauvelt A, Guttman-Yassky E, Worm M, Lynde C, Lacour J-P, et al.  
53 Tralokinumab for moderate-to-severe atopic dermatitis: results from two 52-week,  
54 randomized, double-blind, multicentre, placebo-controlled phase III trials (ECZTRA 1  
55 and ECZTRA 2). *Br J Dermatol.* mars 2021;184(3):437-49.
- 56  
57  
58 21. Silverberg JI, Toth D, Bieber T, Alexis AF, Elewski BE, Pink AE, et al. Tralokinumab  
59 plus topical corticosteroids for the treatment of moderate-to-severe atopic dermatitis:
- 60

- 1  
2  
3 results from the double-blind, randomized, multicentre, placebo-controlled phase III  
4 ECZTRA 3 trial. *Br J Dermatol.* mars 2021;184(3):450-63.  
5
- 6  
7 22. Taylor PC, Weinblatt ME, Burmester GR, Rooney TP, Witt S, Walls CD, et al.  
8 Cardiovascular Safety During Treatment With Baricitinib in Rheumatoid Arthritis.  
9 *Arthritis Rheumatol Hoboken NJ.* juill 2019;71(7):1042-55.
- 10  
11 23. European Medicines Agency. olumiant EPAR risk management plan summary  
12 [Internet]. [cité 22 juill 2021]. Disponible sur:  
13 [https://www.ema.europa.eu/en/documents/rmp-summary/olumiant-epar-risk-](https://www.ema.europa.eu/en/documents/rmp-summary/olumiant-epar-risk-management-plan-summary_en.pdf)  
14 [management-plan-summary\\_en.pdf](https://www.ema.europa.eu/en/documents/rmp-summary/olumiant-epar-risk-management-plan-summary_en.pdf)  
15
- 16  
17 24. Food and Drug Administration. NDA 207924, Baricitinib, a JAK inhibitor for RA  
18 [Internet]. 2018 [cité 16 mai 2021]. Disponible sur:  
19 <https://www.fda.gov/media/112372/download>  
20
- 21  
22 25. Scott IC, Hider SL, Scott DL. Thromboembolism with Janus Kinase (JAK) Inhibitors for  
23 Rheumatoid Arthritis: How Real is the Risk? *Drug Saf.* juill 2018;41(7):645-53.
- 24  
25 26. Mogul A, Corsi K, McAuliffe L. Baricitinib: The Second FDA-Approved JAK Inhibitor  
26 for the Treatment of Rheumatoid Arthritis. *Ann Pharmacother.* sept 2019;53(9):947-53.
- 27  
28 27. Cohen SB, van Vollenhoven RF, Winthrop KL, Zerbini CAF, Tanaka Y, Bessette L, et  
29 al. Safety profile of upadacitinib in rheumatoid arthritis: integrated analysis from the  
30 SELECT phase III clinical programme. *Ann Rheum Dis.* 28 oct 2020;  
31
- 32  
33 28. Molander V, Bower H, Frisell T, Askling J. Risk of venous thromboembolism in  
34 rheumatoid arthritis, and its association with disease activity: a nationwide cohort study  
35 from Sweden. *Ann Rheum Dis.* févr 2021;80(2):169-75.
- 36  
37 29. Downing LJ, Strieter RM, Kadell AM, Wilke CA, Austin JC, Hare BD, et al. IL-10  
38 regulates thrombus-induced vein wall inflammation and thrombosis. *J Immunol Baltim*  
39 *Md* 1950. 1 août 1998;161(3):1471-6.
- 40  
41 30. Riley JK, Takeda K, Akira S, Schreiber RD. Interleukin-10 receptor signaling through  
42 the JAK-STAT pathway. Requirement for two distinct receptor-derived signals for anti-  
43 inflammatory action. *J Biol Chem.* 4 juin 1999;274(23):16513-21.  
44
- 45  
46 31. Xie W, Huang Y, Xiao S, Sun X, Fan Y, Zhang Z. Impact of Janus kinase inhibitors on  
47 risk of cardiovascular events in patients with rheumatoid arthritis: systematic review and  
48 meta-analysis of randomised controlled trials. *Ann Rheum Dis.* août  
49 2019;78(8):1048-54.
- 50  
51 32. Xie W, Xiao S, Huang Y, Sun X, Zhang Z. Effect of tofacitinib on cardiovascular events  
52 and all-cause mortality in patients with immune-mediated inflammatory diseases: a  
53 systematic review and meta-analysis of randomized controlled trials. *Ther Adv*  
54 *Musculoskelet Dis.* 2019;11:1759720X19895492.  
55
- 56  
57 33. Olivera PA, Lasa JS, Bonovas S, Danese S, Peyrin-Biroulet L. Safety of Janus Kinase  
58 Inhibitors in Patients With Inflammatory Bowel Diseases or Other Immune-mediated  
59 Diseases: A Systematic Review and Meta-Analysis. *Gastroenterology.* mai  
60 2020;158(6):1554-1573.e12.

- 1  
2  
3 34. Giménez Poderós T, Gallardo Borge S, Vazquez-Ferreiro P. Risk of Venous  
4 Thromboembolism Associated With Tofacitinib and Baricitinib: A Systematic Review  
5 and Indirect Meta-Analysis. *Pharmacotherapy*. déc 2020;40(12):1248-64.  
6
- 7  
8 35. Yates M, Mootoo A, Adas M, Bechman K, Rampes S, Patel V, et al. Venous  
9 thromboembolism risk with JAK inhibitors: A Meta-analysis. *Arthritis Rheumatol*  
10 *Hoboken NJ*. 10 nov 2020;  
11
- 12 36. Wang F, Sun L, Wang S, Davis JM, Matteson EL, Murad MH, et al. Efficacy and Safety  
13 of Tofacitinib, Baricitinib, and Upadacitinib for Rheumatoid Arthritis: A Systematic  
14 Review and Meta-Analysis. *Mayo Clin Proc*. juill 2020;95(7):1404-19.  
15
- 16 37. Bilal J, Riaz IB, Naqvi SAA, Bhattacharjee S, Obert MR, Sadiq M, et al. Janus Kinase  
17 Inhibitors and Risk of Venous Thromboembolism: A Systematic Review and Meta-  
18 analysis. *Mayo Clin Proc*. juill 2021;96(7):1861-73.  
19
- 20 38. Desai RJ, Pawar A, Weinblatt ME, Kim SC. Comparative Risk of Venous  
21 Thromboembolism in Rheumatoid Arthritis Patients Receiving Tofacitinib Versus Those  
22 Receiving Tumor Necrosis Factor Inhibitors: An Observational Cohort Study. *Arthritis*  
23 *Rheumatol Hoboken NJ*. juin 2019;71(6):892-900.  
24
- 25 39. Desai RJ, Pawar A, Khosrow-Khavar F, Weinblatt ME, Kim SC. Risk of venous  
26 thromboembolism associated with tofacitinib in patients with rheumatoid arthritis: a  
27 population-based cohort study. *Rheumatol Oxf Engl*. 22 mars 2021;keab294.  
28
- 29 40. Meyers KJ, Silverberg JI, Rueda MJ, Goodloe R, Pierce EJ, Deberdt W, et al. Risk of  
30 Venous Thromboembolism Among Patients with Atopic Dermatitis: A Cohort Study in a  
31 US Administrative Claims Database. *Dermatol Ther*. juin 2021;11(3):1041-52.  
32
- 33 41. Setyawan J, Azimi N, Strand V, Yarur A, Fridman M. Reporting of Thromboembolic  
34 Events with JAK Inhibitors: Analysis of the FAERS Database 2010–2019. *Drug Saf*.  
35 2021;44(8):889-97.  
36
- 37 42. Di Nisio M, van Es N, Büller HR. Deep vein thrombosis and pulmonary embolism.  
38 *Lancet Lond Engl*. 17 déc 2016;388(10063):3060-73.  
39
- 40 43. Rothman KJ, Greenland S, Lash TL. *Modern epidemiology*. 2008.  
41
- 42 44. Schneeweiss S, Rassen JA, Brown JS, Rothman KJ, Happe L, Arlett P, et al. Graphical  
43 Depiction of Longitudinal Study Designs in Health Care Databases. *Ann Intern Med*. 19  
44 mars 2019;170(6):398-406.  
45
- 46 45. Consiglio GP, Burden AM, Maclure M, McCarthy L, Cadarette SM. Case-crossover  
47 study design in pharmacoepidemiology: systematic review and recommendations.  
48 *Pharmacoepidemiol Drug Saf*. nov 2013;22(11):1146-53.  
49
- 50 46. Comité scientifique permanent Surveillance et pharmacovigilance du 24/09/2019 -  
51 Formation restreinte Expertise - Compte-rendu (07/02/2020) [Internet]. [cité 20 mai  
52 2021]. Disponible sur: [https://archiveansm.integra.fr/Mediatheque/Publications/Ordres-](https://archiveansm.integra.fr/Mediatheque/Publications/Ordres-du-jour-comptes-rendus-des-commissions-comites-groupe-de-travail-Comites-scientifiques-permanents)  
53 [du-jour-comptes-rendus-des-commissions-comites-](https://archiveansm.integra.fr/Mediatheque/Publications/Ordres-du-jour-comptes-rendus-des-commissions-comites-groupe-de-travail-Comites-scientifiques-permanents)  
54 [groupe-de-travail-Comites-](https://archiveansm.integra.fr/Mediatheque/Publications/Ordres-du-jour-comptes-rendus-des-commissions-comites-groupe-de-travail-Comites-scientifiques-permanents)  
55 [scientifiques-permanents](https://archiveansm.integra.fr/Mediatheque/Publications/Ordres-du-jour-comptes-rendus-des-commissions-comites-groupe-de-travail-Comites-scientifiques-permanents)  
56  
57  
58  
59  
60



- 1
- 2
- 3
- 4 47. Bannay A, Chaignot C, Blotière P-O, Basson M, Weill A, Ricordeau P, et al. The Best
- 5 Use of the Charlson Comorbidity Index With Electronic Health Care Database to Predict
- 6 Mortality. *Med Care*. févr 2016;54(2):188-94.
- 7
- 8 48. Charlson M, Szatrowski TP, Peterson J, Gold J. Validation of a combined comorbidity
- 9 index. *J Clin Epidemiol*. nov 1994;47(11):1245-51.
- 10
- 11 49. Kunutsor SK, Seidu S, Khunti K. Statins and primary prevention of venous
- 12 thromboembolism: a systematic review and meta-analysis. *Lancet Haematol*. févr
- 13 2017;4(2):e83-93.
- 14
- 15 50. Johannesdottir SA, Horváth-Puhó E, Dekkers OM, Cannegieter SC, Jørgensen JOL,
- 16 Ehrenstein V, et al. Use of glucocorticoids and risk of venous thromboembolism: a
- 17 nationwide population-based case-control study. *JAMA Intern Med*. 13 mai
- 18 2013;173(9):743-52.
- 19
- 20 51. Zhang A, Silverberg JI. Association of atopic dermatitis with being overweight and
- 21 obese: a systematic review and metaanalysis. *J Am Acad Dermatol*. avr 2015;72(4):606-
- 22 616.e4.
- 23
- 24 52. Haute Autorité de Santé. Olumiant et dermatite atopique, avis de la commission de
- 25 transparence [Internet]. 2021 [cité 23 juill 2021]. Disponible sur: [https://www.has-](https://www.has-sante.fr/upload/docs/evamed/CT-18912_OLUMIANT_PIC_EI_DA_AvisDef_CT18912.pdf)
- 26 [sante.fr/upload/docs/evamed/CT-](https://www.has-sante.fr/upload/docs/evamed/CT-18912_OLUMIANT_PIC_EI_DA_AvisDef_CT18912.pdf)
- 27 [18912\\_OLUMIANT\\_PIC\\_EI\\_DA\\_AvisDef\\_CT18912.pdf](https://www.has-sante.fr/upload/docs/evamed/CT-18912_OLUMIANT_PIC_EI_DA_AvisDef_CT18912.pdf)
- 28
- 29 53. European Medicines Agency. Rinvoq-résumé des caractéristiques du produit [Internet].
- 30 European Medicines Agency. 2019 [cité 20 mai 2021]. Disponible sur:
- 31 <https://www.ema.europa.eu/en/medicines/human/EPAR/rinvoq>
- 32
- 33 54. Trifan G, Shafi N, Testai FD. Implications of Janus Kinase 2 Mutation in Embolic
- 34 Stroke of Unknown Source. *J Stroke Cerebrovasc Dis Off J Natl Stroke Assoc*. oct
- 35 2018;27(10):2572-8.
- 36
- 37 55. Hobbs CM, Manning H, Bennett C, Vasquez L, Severin S, Brain L, et al. JAK2V617F
- 38 leads to intrinsic changes in platelet formation and reactivity in a knock-in mouse model
- 39 of essential thrombocythemia. *Blood*. 28 nov 2013;122(23):3787-97.
- 40
- 41 56. Matta F, Singala R, Yaekoub AY, Najjar R, Stein PD. Risk of venous thromboembolism
- 42 with rheumatoid arthritis. *Thromb Haemost*. janv 2009;101(1):134-8.
- 43
- 44 57. Zöller B, Li X, Sundquist J, Sundquist K. Autoimmune diseases and venous
- 45 thromboembolism: a review of the literature. *Am J Cardiovasc Dis*. 2012;2(3):171-83.
- 46
- 47 58. Galloway J, Barrett K, Irving P, Khavandi K, Nijher M, Nicholson R, et al. Risk of
- 48 venous thromboembolism in immune-mediated inflammatory diseases: a UK matched
- 49 cohort study. *RMD Open*. sept 2020;6(3).
- 50
- 51 59. Schmidt C. Traitement ambulatoire des thromboses veineuses profondes des membres
- 52 inférieurs à la phase aiguë Outpatient treatment of deep vein thrombosis. 2002;6.
- 53
- 54 60. Maclure M. The case-crossover design: a method for studying transient effects on the
- 55 risk of acute events. *Am J Epidemiol*. 15 janv 1991;133(2):144-53.
- 56
- 57
- 58
- 59
- 60

- 1  
2  
3 61. Maclure M, Fireman B, Nelson JC, Hua W, Shoaibi A, Paredes A, et al. When should  
4 case-only designs be used for safety monitoring of medical products?  
5 *Pharmacoepidemiol Drug Saf.* janv 2012;21 Suppl 1:50-61.  
6
- 7 62. Bykov K, Mittleman MA, Glynn RJ, Schneeweiss S, Gagne JJ. The Case-Crossover  
8 Design for Drug-Drug Interactions: Considerations for Implementation. *Epidemiol*  
9 *Camb Mass.* mars 2019;30(2):204-11.  
10
- 11 63. Kremer J, Huizinga TWJ, Chen L, Saifan CG, Issa M, Witt SL, et al. FRI0090 Analysis  
12 of neutrophils, lymphocytes, and platelets in pooled phase 2 and phase 3 studies of  
13 baricitinib for rheumatoid arthritis. *Ann Rheum Dis.* 1 juin 2017;76(Suppl 2):512-512.  
14
- 15 64. Olumiant [Internet]. European Medicines Agency. 2018 [cité 20 mai 2021]. Disponible  
16 sur: <https://www.ema.europa.eu/en/medicines/human/EPAR/olumiant>  
17
- 18 65. Norris LA, Bonnar J. Haemostatic changes and the oral contraceptive pill. *Baillieres Clin*  
19 *Obstet Gynaecol.* sept 1997;11(3):545-64.  
20
- 21 66. Norris LA, Bonnar J. Effect of oestrogen dose on whole blood platelet activation in  
22 women taking new low dose oral contraceptives. *Thromb Haemost.* déc  
23 1994;72(6):926-30.  
24
- 25 67. Quehenberger P, Loner U, Kapiotis S, Handler S, Schneider B, Huber J, et al. Increased  
26 levels of activated factor VII and decreased plasma protein S activity and circulating  
27 thrombomodulin during use of oral contraceptives. *Thromb Haemost.* nov  
28 1996;76(5):729-34.  
29
- 30 68. Kelleher CC. Clinical aspects of the relationship between oral contraceptives and  
31 abnormalities of the hemostatic system: relation to the development of cardiovascular  
32 disease. *Am J Obstet Gynecol.* juill 1990;163(1 Pt 2):392-5.  
33
- 34 69. Contraceptifs hormonaux combinés (pilules, anneau vaginal et patch) : Position finale du  
35 Comité des médicaments à usage humain (CHMP) - Point d'information - ANSM :  
36 Agence nationale de sécurité du médicament et des produits de santé [Internet]. [cité 22  
37 sept 2021]. Disponible sur: <https://archiveansm.integra.fr/S-informer/Travaux-de-l-Agence-Europeenne-des-Medicaments-EMA-Comite-des-medicaments-a-usage-humain-CHMP/Contraceptifs-hormonaux-combines-pilules-anneau-vaginal-et-patch-Position-finale-du-Comite-des-medicaments-a-usage-humain-CHMP-Point-d-information>  
38
- 39 70. Heit JA, Spencer FA, White RH. The epidemiology of venous thromboembolism. *J*  
40 *Thromb Thrombolysis.* janv 2016;41(1):3-14.  
41
- 42 71. Falanga A, Russo L, Milesi V, Vignoli A. Mechanisms and risk factors of thrombosis in  
43 cancer. *Crit Rev Oncol Hematol.* oct 2017;118:79-83.  
44
- 45 72. Sweetland S, Parkin L, Balkwill A, Green J, Reeves G, Beral V, et al. Smoking, surgery,  
46 and venous thromboembolism risk in women: United Kingdom cohort study. *Circulation.* 26 mars 2013;127(12):1276-82.  
47  
48  
49  
50  
51  
52  
53  
54  
55  
56  
57  
58  
59  
60

- 1  
2  
3 73. Bjøri E, Johnsen HS, Hansen J-B, Brækkan SK. Hospitalization as a trigger for venous  
4 thromboembolism - Results from a population-based case-crossover study. *Thromb Res.*  
5 avr 2019;176:115-9.  
6  
7  
8 74. Rott H. Prevention and treatment of venous thromboembolism during HRT: current  
9 perspectives. *Int J Gen Med.* 2014;7:433-40.  
10  
11 75. Aksu K, Donmez A, Keser G. Inflammation-induced thrombosis: mechanisms, disease  
12 associations and management. *Curr Pharm Des.* 2012;18(11):1478-93.  
13  
14 76. van den Oever I a. M, Sattar N, Nurmohamed MT. Thromboembolic and cardiovascular  
15 risk in rheumatoid arthritis: role of the haemostatic system. *Ann Rheum Dis.* juin  
16 2014;73(6):954-7.  
17  
18 77. Gaertner S, Cordeanu E-M, Mirea C, Frantz A-S, Auger C, Bilbault P, et al. Increased  
19 risk and severity of unprovoked venous thromboembolism with clustering cardiovascular  
20 risk factors for atherosclerosis: Results of the REMOTEV registry. *Int J Cardiol.* 1 févr  
21 2018;252:169-74.  
22  
23  
24 78. Ageno W, Becattini C, Brighton T, Selby R, Kamphuisen PW. Cardiovascular risk  
25 factors and venous thromboembolism: a meta-analysis. *Circulation.* 1 janv  
26 2008;117(1):93-102.  
27  
28  
29 79. Zakai NA, McClure LA, Judd SE, Safford MM, Folsom AR, Lutsey PL, et al. Racial and  
30 regional differences in venous thromboembolism in the United States in 3 cohorts.  
31 *Circulation.* 8 avr 2014;129(14):1502-9.  
32  
33 80. Hallas J, Pottegård A. Use of self-controlled designs in pharmacoepidemiology. *J Intern*  
34 *Med.* juin 2014;275(6):581-9.  
35  
36  
37  
38  
39  
40  
41  
42  
43  
44  
45  
46  
47  
48  
49  
50  
51  
52  
53  
54  
55  
56  
57  
58  
59  
60

- Nested case-control study (analysis #1)
- Nested case-time-control study (analysis #2): in patients with a VTE, we shall compare the frequency of JAKi initiation in the risk period (before VTE) with the frequency of JAKi initiation in the reference period (prior to the risk period).

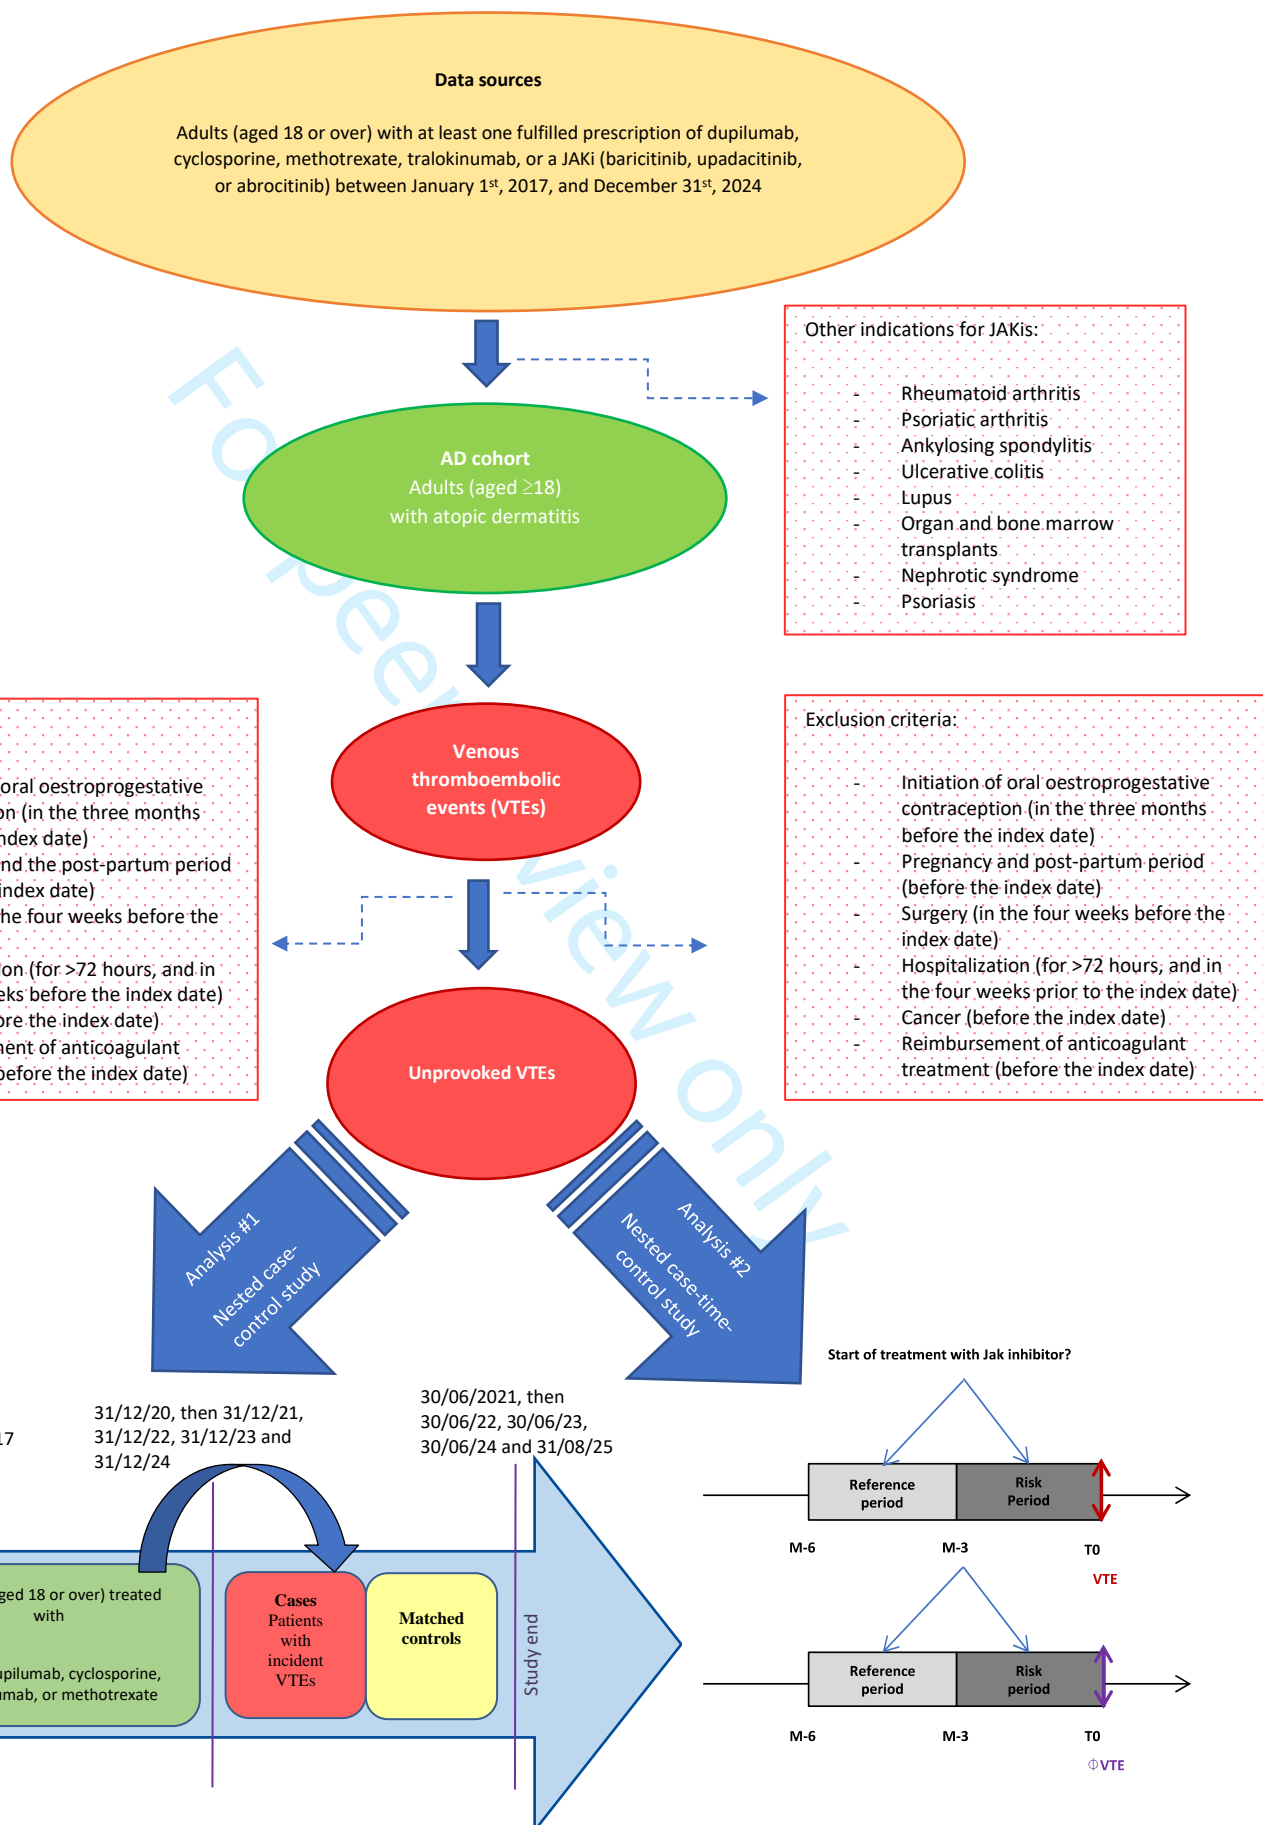

**Figure 2: Schneeweiss diagram for analysis #1**

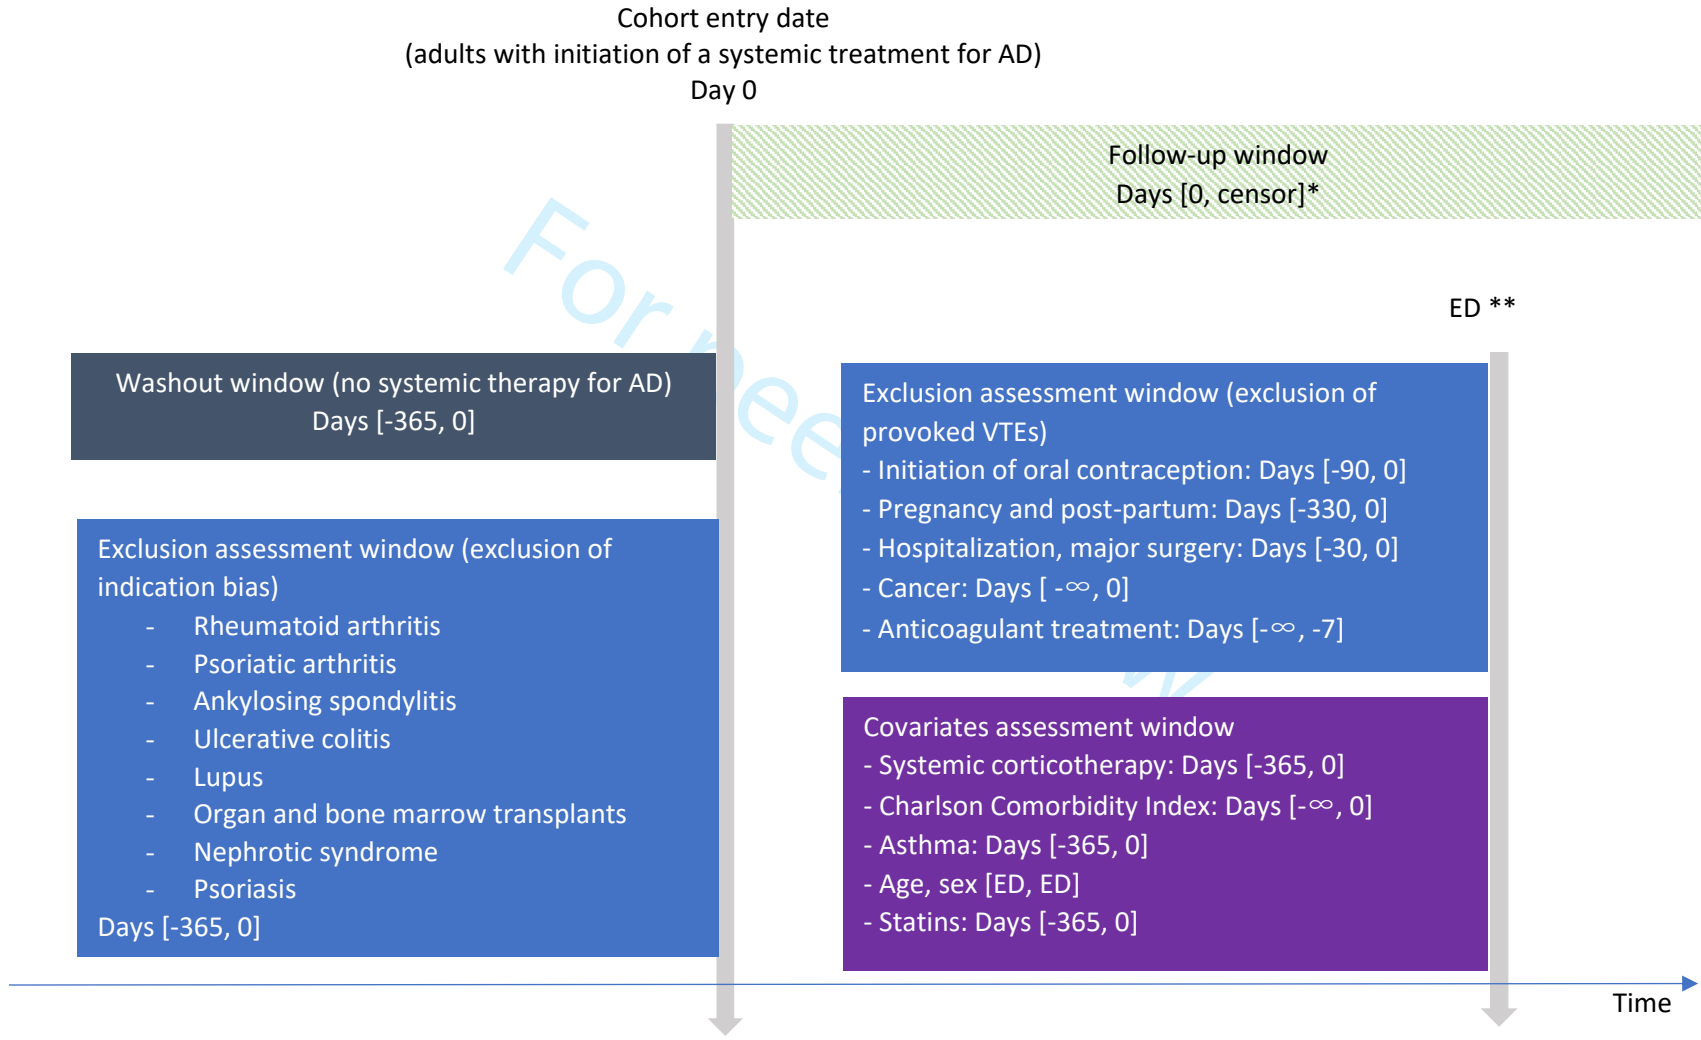

Abbreviations: AD, atopic dermatitis; ED, event date; VTE, venous thromboembolic event

\*Censored at the date of the first VTE, death, emigration, or the end of the study period

\*\* ED: the date of the first VTE (the index date)

1  
2  
3  
4  
5  
6  
7  
8  
9  
10  
11  
12  
13  
14  
15  
16  
17  
18  
19  
20  
21  
22  
23  
24  
25  
26  
27  
28  
29  
30  
31  
32  
33  
34  
35  
36  
37  
38  
39  
40  
41  
42  
43  
44  
45  
46

For peer review only

1  
2  
3  
4  
5  
6  
7  
8  
9  
10  
11  
12  
13  
14  
15  
16  
17  
18  
19  
20  
21  
22  
23  
24  
25  
26  
27  
28  
29  
30

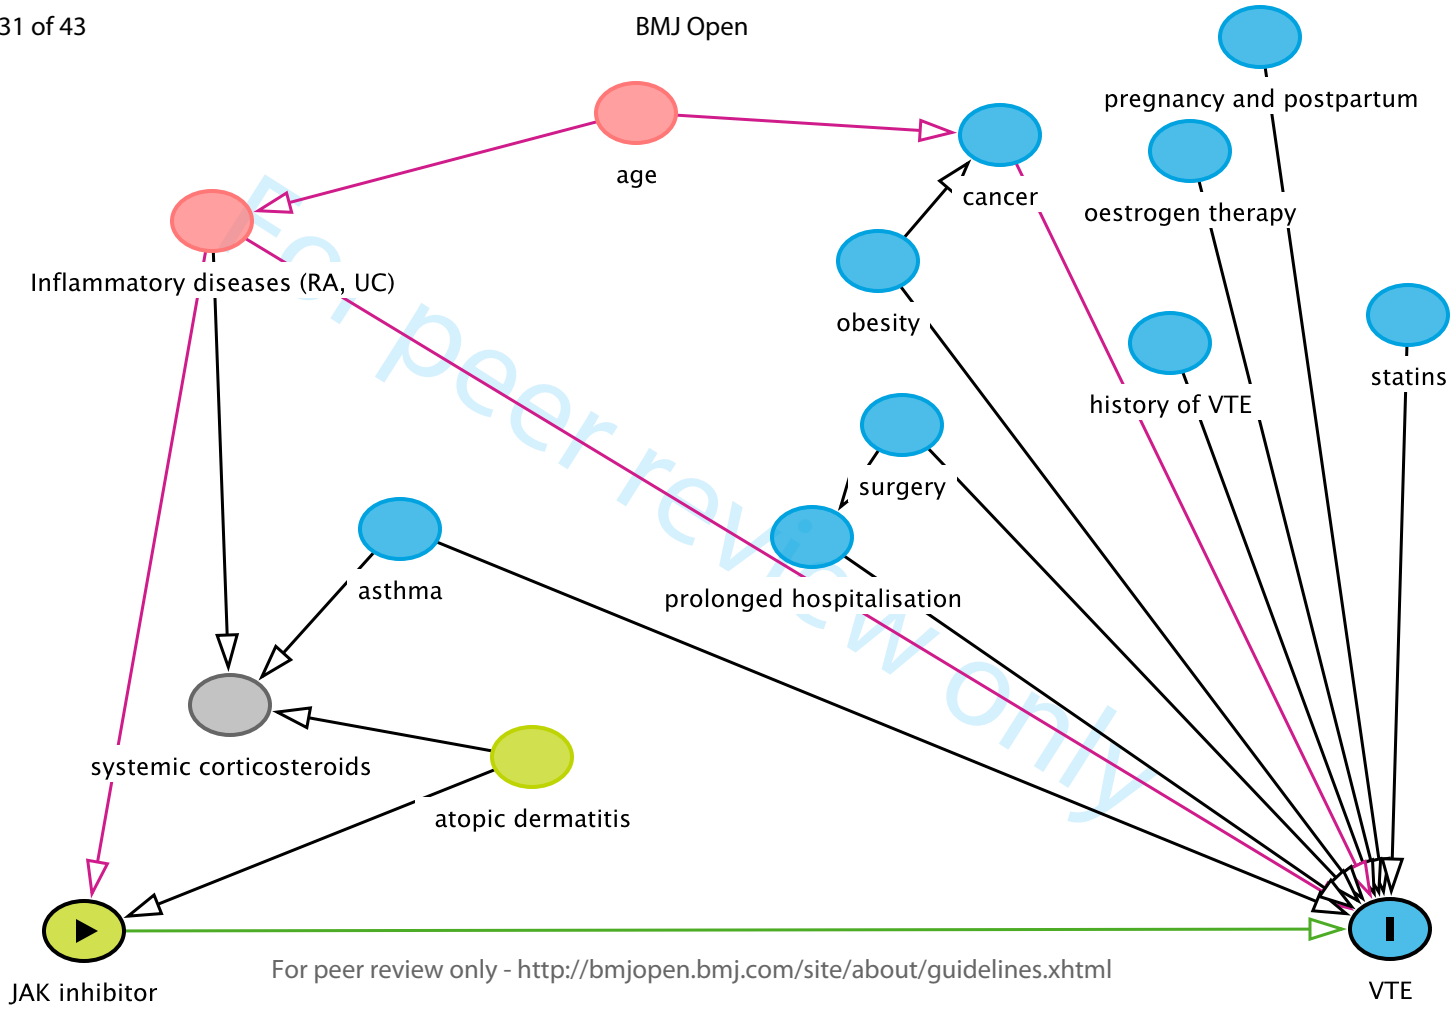



EUROPEAN MEDICINES AGENCY  
SCIENCE MEDICINES HEALTH



European Network of Centres for  
Pharmacoepidemiology and  
Pharmacovigilance

Doc.Ref. EMA/540136/2009

## ENCePP Checklist for Study Protocols (Revision 4)

Adopted by the ENCePP Steering Group on 15/10/2018

The [European Network of Centres for Pharmacoepidemiology and Pharmacovigilance \(ENCePP\)](#) welcomes innovative designs and new methods of research. This Checklist has been developed by ENCePP to stimulate consideration of important principles when designing and writing a pharmacoepidemiological or pharmacovigilance study protocol. The Checklist is intended to promote the quality of such studies, not their uniformity. The user is also referred to the [ENCePP Guide on Methodological Standards in Pharmacoepidemiology](#), which reviews and gives direct electronic access to guidance for research in pharmacoepidemiology and pharmacovigilance.

For each question of the Checklist, the investigator should indicate whether or not it has been addressed in the study protocol. If the answer is "Yes", the section number of the protocol where this issue has been discussed should be specified. It is possible that some questions do not apply to a particular study (for example, in the case of an innovative study design). In this case, the answer 'N/A' (Not Applicable) can be checked and the "Comments" field included for each section should be used to explain why. The "Comments" field can also be used to elaborate on a "No" answer.

This Checklist should be included as an Annex by marketing authorisation holders when submitting the protocol of a non-interventional post-authorisation safety study (PASS) to a regulatory authority (see the [Guidance on the format and content of the protocol of non-interventional post-authorisation safety studies](#)). The Checklist is a supporting document and does not replace the format of the protocol for PASS presented in the Guidance and Module VIII of the Good pharmacovigilance practices (GVP).

**Study title:** Oral Janus kinases inhibitors and venous thromboembolism in atopic dermatitis: Protocol of a case-time control study and a nested case-control study based on French SNDS cohort

**EU PAS Register® number:**  
**Study reference number (if applicable):**

| <b>Section 1: Milestones</b>                | <b>Yes</b>                          | <b>No</b>                | <b>N/A</b>                          | <b>Section Number</b> |
|---------------------------------------------|-------------------------------------|--------------------------|-------------------------------------|-----------------------|
| 1.1 Does the protocol specify timelines for |                                     |                          |                                     |                       |
| 1.1.1 Start of data collection <sup>1</sup> | <input checked="" type="checkbox"/> | <input type="checkbox"/> | <input type="checkbox"/>            | p. 10                 |
| 1.1.2 End of data collection <sup>2</sup>   | <input checked="" type="checkbox"/> | <input type="checkbox"/> | <input type="checkbox"/>            | p. 10                 |
| 1.1.3 Progress report(s)                    | <input type="checkbox"/>            | <input type="checkbox"/> | <input checked="" type="checkbox"/> |                       |
| 1.1.4 Interim report(s)                     | <input type="checkbox"/>            | <input type="checkbox"/> | <input checked="" type="checkbox"/> |                       |

<sup>1</sup> Date from which information on the first study is first recorded in the study dataset or, in the case of secondary use of data, the date from which data extraction starts.

<sup>2</sup> Date from which the analytical dataset is completely available.



1  
2  
3  
4  
5  
6  
7  
8  
9  
10  
11  
12  
13  
14  
15  
16  
17  
18  
19  
20  
21  
22  
23  
24  
25  
26  
27  
28  
29  
30  
31  
32  
33  
34  
35  
36  
37  
38  
39  
40  
41  
42  
43  
44  
45  
46  
47  
48  
49  
50  
51  
52  
53  
54  
55  
56  
57  
58  
59  
60

| <b><u>Section 1: Milestones</u></b>        | <b>Yes</b>                          | <b>No</b>                           | <b>N/A</b>               | <b>Section Number</b> |
|--------------------------------------------|-------------------------------------|-------------------------------------|--------------------------|-----------------------|
| 1.1.5 Registration in the EU PAS Register® | <input type="checkbox"/>            | <input checked="" type="checkbox"/> | <input type="checkbox"/> | p.17                  |
| 1.1.6 Final report of study results.       | <input checked="" type="checkbox"/> | <input type="checkbox"/>            | <input type="checkbox"/> |                       |

Comments:

|  |
|--|
|  |
|--|

| <b><u>Section 2: Research question</u></b>                                                                                                                      | <b>Yes</b>                          | <b>No</b>                | <b>N/A</b>                          | <b>Section Number</b> |
|-----------------------------------------------------------------------------------------------------------------------------------------------------------------|-------------------------------------|--------------------------|-------------------------------------|-----------------------|
| 2.1 Does the formulation of the research question and objectives clearly explain:                                                                               | <input checked="" type="checkbox"/> | <input type="checkbox"/> | <input type="checkbox"/>            | p. 6-8                |
| 2.1.1 Why the study is conducted? (e.g. to address an important public health concern, a risk identified in the risk management plan, an emerging safety issue) | <input checked="" type="checkbox"/> | <input type="checkbox"/> | <input type="checkbox"/>            | p. 6-8                |
| 2.1.2 The objective(s) of the study?                                                                                                                            | <input checked="" type="checkbox"/> | <input type="checkbox"/> | <input type="checkbox"/>            | p. 9-10               |
| 2.1.3 The target population? (i.e. population or subgroup to whom the study results are intended to be generalised)                                             | <input checked="" type="checkbox"/> | <input type="checkbox"/> | <input type="checkbox"/>            | p. 9                  |
| 2.1.4 Which hypothesis(-es) is (are) to be tested?                                                                                                              | <input checked="" type="checkbox"/> | <input type="checkbox"/> | <input type="checkbox"/>            | p. 9                  |
| 2.1.5 If applicable, that there is no <i>a priori</i> hypothesis?                                                                                               | <input type="checkbox"/>            | <input type="checkbox"/> | <input checked="" type="checkbox"/> |                       |

Comments:

|  |
|--|
|  |
|--|

| <b><u>Section 3: Study design</u></b>                                                                                                                                                                 | <b>Yes</b>                          | <b>No</b>                | <b>N/A</b>                          | <b>Section Number</b> |
|-------------------------------------------------------------------------------------------------------------------------------------------------------------------------------------------------------|-------------------------------------|--------------------------|-------------------------------------|-----------------------|
| 3.1 Is the study design described? (e.g. cohort, case-control, cross-sectional, other design)                                                                                                         | <input checked="" type="checkbox"/> | <input type="checkbox"/> | <input type="checkbox"/>            | p. 9-14               |
| 3.2 Does the protocol specify whether the study is based on primary, secondary or combined data collection?                                                                                           | <input checked="" type="checkbox"/> | <input type="checkbox"/> | <input type="checkbox"/>            | p. 10-11              |
| 3.3 Does the protocol specify measures of occurrence? (e.g., rate, risk, prevalence)                                                                                                                  | <input checked="" type="checkbox"/> | <input type="checkbox"/> | <input type="checkbox"/>            | p. 12-13              |
| 3.4 Does the protocol specify measure(s) of association? (e.g. risk, odds ratio, excess risk, rate ratio, hazard ratio, risk/rate difference, number needed to harm (NNH))                            | <input checked="" type="checkbox"/> | <input type="checkbox"/> | <input type="checkbox"/>            | p. 12-13              |
| 3.5 Does the protocol describe the approach for the collection and reporting of adverse events/adverse reactions? (e.g. adverse events that will not be collected in case of primary data collection) | <input type="checkbox"/>            | <input type="checkbox"/> | <input checked="" type="checkbox"/> |                       |

Comments:

|  |
|--|
|  |
|--|

| <b><u>Section 4: Source and study populations</u></b>    | <b>Yes</b>                          | <b>No</b>                | <b>N/A</b>               | <b>Section Number</b> |
|----------------------------------------------------------|-------------------------------------|--------------------------|--------------------------|-----------------------|
| 4.1 Is the source population described?                  | <input checked="" type="checkbox"/> | <input type="checkbox"/> | <input type="checkbox"/> | p. 10-11              |
| 4.2 Is the planned study population defined in terms of: |                                     |                          |                          |                       |
| 4.2.1 Study time period                                  | <input checked="" type="checkbox"/> | <input type="checkbox"/> | <input type="checkbox"/> | p. 10                 |

| <b>Section 4: Source and study populations</b>                                                                                                 | <b>Yes</b>                          | <b>No</b>                | <b>N/A</b>               | <b>Section Number</b> |
|------------------------------------------------------------------------------------------------------------------------------------------------|-------------------------------------|--------------------------|--------------------------|-----------------------|
| 4.2.2 Age and sex                                                                                                                              | <input checked="" type="checkbox"/> | <input type="checkbox"/> | <input type="checkbox"/> | p. 10                 |
| 4.2.3 Country of origin                                                                                                                        | <input checked="" type="checkbox"/> | <input type="checkbox"/> | <input type="checkbox"/> | p. 10                 |
| 4.2.4 Disease/indication                                                                                                                       | <input checked="" type="checkbox"/> | <input type="checkbox"/> | <input type="checkbox"/> | p. 10                 |
| 4.2.5 Duration of follow-up                                                                                                                    | <input checked="" type="checkbox"/> | <input type="checkbox"/> | <input type="checkbox"/> | p. 10-11              |
| 4.3 Does the protocol define how the study population will be sampled from the source population? (e.g. event or inclusion/exclusion criteria) | <input checked="" type="checkbox"/> | <input type="checkbox"/> | <input type="checkbox"/> | p. 10-11              |

Comments:

|  |
|--|
|  |
|--|

| <b>Section 5: Exposure definition and measurement</b>                                                                                                                                               | <b>Yes</b>                          | <b>No</b>                           | <b>N/A</b>               | <b>Section Number</b> |
|-----------------------------------------------------------------------------------------------------------------------------------------------------------------------------------------------------|-------------------------------------|-------------------------------------|--------------------------|-----------------------|
| 5.1 Does the protocol describe how the study exposure is defined and measured? (e.g. operational details for defining and categorising exposure, measurement of dose and duration of drug exposure) | <input checked="" type="checkbox"/> | <input type="checkbox"/>            | <input type="checkbox"/> | p. 10-11              |
| 5.2 Does the protocol address the validity of the exposure measurement? (e.g. precision, accuracy, use of validation sub-study)                                                                     | <input checked="" type="checkbox"/> | <input type="checkbox"/>            | <input type="checkbox"/> | p. 10-11              |
| 5.3 Is exposure categorised according to time windows?                                                                                                                                              | <input checked="" type="checkbox"/> | <input type="checkbox"/>            | <input type="checkbox"/> | p. 10-11              |
| 5.4 Is intensity of exposure addressed? (e.g. dose, duration)                                                                                                                                       | <input checked="" type="checkbox"/> | <input type="checkbox"/>            | <input type="checkbox"/> | p. 10-11              |
| 5.5 Is exposure categorised based on biological mechanism of action and taking into account the pharmacokinetics and pharmacodynamics of the drug?                                                  | <input type="checkbox"/>            | <input checked="" type="checkbox"/> | <input type="checkbox"/> |                       |
| 5.6 Is (are) (an) appropriate comparator(s) identified?                                                                                                                                             | <input checked="" type="checkbox"/> | <input type="checkbox"/>            | <input type="checkbox"/> | p. 10-11              |

Comments:

|  |
|--|
|  |
|--|

| <b>Section 6: Outcome definition and measurement</b>                                                                                                                                                                     | <b>Yes</b>                          | <b>No</b>                | <b>N/A</b>                          | <b>Section Number</b> |
|--------------------------------------------------------------------------------------------------------------------------------------------------------------------------------------------------------------------------|-------------------------------------|--------------------------|-------------------------------------|-----------------------|
| 6.1 Does the protocol specify the primary and secondary (if applicable) outcome(s) to be investigated?                                                                                                                   | <input checked="" type="checkbox"/> | <input type="checkbox"/> | <input type="checkbox"/>            | p. 11                 |
| 6.2 Does the protocol describe how the outcomes are defined and measured?                                                                                                                                                | <input checked="" type="checkbox"/> | <input type="checkbox"/> | <input type="checkbox"/>            | p. 11-12              |
| 6.3 Does the protocol address the validity of outcome measurement? (e.g. precision, accuracy, sensitivity, specificity, positive predictive value, use of validation sub-study)                                          | <input checked="" type="checkbox"/> | <input type="checkbox"/> | <input type="checkbox"/>            | p. 11                 |
| 6.4 Does the protocol describe specific outcomes relevant for Health Technology Assessment? (e.g. HRQoL, QALYs, DALYs, health care services utilisation, burden of disease or treatment, compliance, disease management) | <input type="checkbox"/>            | <input type="checkbox"/> | <input checked="" type="checkbox"/> |                       |

1  
2  
3  
4  
5  
6  
7  
8  
9  
10  
11  
12  
13  
14  
15  
16  
17  
18  
19  
20  
21  
22  
23  
24  
25  
26  
27  
28  
29  
30  
31  
32  
33  
34  
35  
36  
37  
38  
39  
40  
41  
42  
43  
44  
45  
46  
47  
48  
49  
50  
51  
52  
53  
54  
55  
56  
57  
58  
59  
60

Comments:

|  |
|--|
|  |
|--|

| <b>Section 7: Bias</b>                                                                                               | <b>Yes</b>                          | <b>No</b>                | <b>N/A</b>               | <b>Section Number</b> |
|----------------------------------------------------------------------------------------------------------------------|-------------------------------------|--------------------------|--------------------------|-----------------------|
| 7.1 Does the protocol address ways to measure confounding? (e.g. confounding by indication)                          | <input checked="" type="checkbox"/> | <input type="checkbox"/> | <input type="checkbox"/> | p. 14                 |
| 7.2 Does the protocol address selection bias? (e.g. healthy user/adherer bias)                                       | <input checked="" type="checkbox"/> | <input type="checkbox"/> | <input type="checkbox"/> | p.18                  |
| 7.3 Does the protocol address information bias? (e.g. misclassification of exposure and outcomes, time-related bias) | <input checked="" type="checkbox"/> | <input type="checkbox"/> | <input type="checkbox"/> | p.18                  |

Comments:

|  |
|--|
|  |
|--|

| <b>Section 8: Effect measure modification</b>                                                                                                            | <b>Yes</b>                          | <b>No</b>                | <b>N/A</b>               | <b>Section Number</b> |
|----------------------------------------------------------------------------------------------------------------------------------------------------------|-------------------------------------|--------------------------|--------------------------|-----------------------|
| 8.1 Does the protocol address effect modifiers? (e.g. collection of data on known effect modifiers, sub-group analyses, anticipated direction of effect) | <input checked="" type="checkbox"/> | <input type="checkbox"/> | <input type="checkbox"/> | p. 14                 |

Comments:

|  |
|--|
|  |
|--|

| <b>Section 9: Data sources</b>                                                                                                                                           | <b>Yes</b>                          | <b>No</b>                | <b>N/A</b>               | <b>Section Number</b> |
|--------------------------------------------------------------------------------------------------------------------------------------------------------------------------|-------------------------------------|--------------------------|--------------------------|-----------------------|
| 9.1 Does the protocol describe the data source(s) used in the study for the ascertainment of:                                                                            |                                     |                          |                          |                       |
| 9.1.1 Exposure? (e.g. pharmacy dispensing, general practice prescribing, claims data, self-report, face-to-face interview)                                               | <input checked="" type="checkbox"/> | <input type="checkbox"/> | <input type="checkbox"/> | p. 10-11              |
| 9.1.2 Outcomes? (e.g. clinical records, laboratory markers or values, claims data, self-report, patient interview including scales and questionnaires, vital statistics) | <input checked="" type="checkbox"/> | <input type="checkbox"/> | <input type="checkbox"/> | p. 11-12              |
| 9.1.3 Covariates and other characteristics?                                                                                                                              | <input checked="" type="checkbox"/> | <input type="checkbox"/> | <input type="checkbox"/> | p. 14                 |
| 9.2 Does the protocol describe the information available from the data source(s) on:                                                                                     |                                     |                          |                          |                       |
| 9.2.1 Exposure? (e.g. date of dispensing, drug quantity, dose, number of days of supply prescription, daily dosage, prescriber)                                          | <input checked="" type="checkbox"/> | <input type="checkbox"/> | <input type="checkbox"/> | p. 10-11              |
| 9.2.2 Outcomes? (e.g. date of occurrence, multiple event, severity measures related to event)                                                                            | <input checked="" type="checkbox"/> | <input type="checkbox"/> | <input type="checkbox"/> | p. 11-12              |
| 9.2.3 Covariates and other characteristics? (e.g. age, sex, clinical and drug use history, co-morbidity, co-mediations, lifestyle)                                       | <input checked="" type="checkbox"/> | <input type="checkbox"/> | <input type="checkbox"/> | p. 14                 |
| 9.3 Is a coding system described for:                                                                                                                                    |                                     |                          |                          |                       |
| 9.3.1 Exposure? (e.g. WHO Drug Dictionary, Anatomical Therapeutic Chemical (ATC) Classification System)                                                                  | <input checked="" type="checkbox"/> | <input type="checkbox"/> | <input type="checkbox"/> | Table 2               |
| 9.3.2 Outcomes? (e.g. International Classification of Diseases (ICD), Medical Dictionary for Regulatory Activities (MedDRA))                                             | <input checked="" type="checkbox"/> | <input type="checkbox"/> | <input type="checkbox"/> | Table 2               |
| 9.3.3 Covariates and other characteristics?                                                                                                                              | <input checked="" type="checkbox"/> | <input type="checkbox"/> | <input type="checkbox"/> | Table 2               |

| <b>Section 9: Data sources</b>                                                                       | <b>Yes</b>               | <b>No</b>                | <b>N/A</b>                          | <b>Section Number</b> |
|------------------------------------------------------------------------------------------------------|--------------------------|--------------------------|-------------------------------------|-----------------------|
| 9.4 Is a linkage method between data sources described? (e.g. based on a unique identifier or other) | <input type="checkbox"/> | <input type="checkbox"/> | <input checked="" type="checkbox"/> |                       |

Comments:

| <b>Section 10: Analysis plan</b>                                                       | <b>Yes</b>                          | <b>No</b>                           | <b>N/A</b>                          | <b>Section Number</b> |
|----------------------------------------------------------------------------------------|-------------------------------------|-------------------------------------|-------------------------------------|-----------------------|
| 10.1 Are the statistical methods and the reason for their choice described?            | <input checked="" type="checkbox"/> | <input type="checkbox"/>            | <input type="checkbox"/>            | p. 9, 12, 13, 14      |
| 10.2 Is study size and/or statistical precision estimated?                             | <input checked="" type="checkbox"/> | <input type="checkbox"/>            | <input type="checkbox"/>            | p. 16                 |
| 10.3 Are descriptive analyses included?                                                | <input checked="" type="checkbox"/> | <input type="checkbox"/>            | <input type="checkbox"/>            | p.12-13               |
| 10.4 Are stratified analyses included?                                                 | <input type="checkbox"/>            | <input checked="" type="checkbox"/> | <input type="checkbox"/>            |                       |
| 10.5 Does the plan describe methods for analytic control of confounding?               | <input checked="" type="checkbox"/> | <input type="checkbox"/>            | <input type="checkbox"/>            | p. 18, 19             |
| 10.6 Does the plan describe methods for analytic control of outcome misclassification? | <input checked="" type="checkbox"/> | <input type="checkbox"/>            | <input type="checkbox"/>            | p. 19                 |
| 10.7 Does the plan describe methods for handling missing data?                         | <input type="checkbox"/>            | <input type="checkbox"/>            | <input checked="" type="checkbox"/> |                       |
| 10.8 Are relevant sensitivity analyses described?                                      | <input checked="" type="checkbox"/> | <input type="checkbox"/>            | <input type="checkbox"/>            | p. 14                 |

Comments:

| <b>Section 11: Data management and quality control</b>                                                                                                    | <b>Yes</b>                          | <b>No</b>                | <b>N/A</b>                          | <b>Section Number</b> |
|-----------------------------------------------------------------------------------------------------------------------------------------------------------|-------------------------------------|--------------------------|-------------------------------------|-----------------------|
| 11.1 Does the protocol provide information on data storage? (e.g. software and IT environment, database maintenance and anti-fraud protection, archiving) | <input checked="" type="checkbox"/> | <input type="checkbox"/> | <input type="checkbox"/>            | p. 17                 |
| 11.2 Are methods of quality assurance described?                                                                                                          | <input type="checkbox"/>            | <input type="checkbox"/> | <input checked="" type="checkbox"/> |                       |
| 11.3 Is there a system in place for independent review of study results?                                                                                  | <input checked="" type="checkbox"/> | <input type="checkbox"/> | <input type="checkbox"/>            | p. 17                 |

Comments:

| <b>Section 12: Limitations</b>                                                                                                                                                       | <b>Yes</b>                          | <b>No</b>                | <b>N/A</b>               | <b>Section Number</b> |
|--------------------------------------------------------------------------------------------------------------------------------------------------------------------------------------|-------------------------------------|--------------------------|--------------------------|-----------------------|
| 12.1 Does the protocol discuss the impact on the study results of:                                                                                                                   |                                     |                          |                          |                       |
| 12.1.1 Selection bias?                                                                                                                                                               | <input checked="" type="checkbox"/> | <input type="checkbox"/> | <input type="checkbox"/> | p. 18-19              |
| 12.1.2 Information bias?                                                                                                                                                             | <input checked="" type="checkbox"/> | <input type="checkbox"/> | <input type="checkbox"/> | p. 18-19              |
| 12.1.3 Residual/unmeasured confounding?<br>(e.g. anticipated direction and magnitude of such biases, validation sub-study, use of validation and external data, analytical methods). | <input checked="" type="checkbox"/> | <input type="checkbox"/> | <input type="checkbox"/> | p. 19                 |

| <b><u>Section 12: Limitations</u></b>                                                                                                                                                         | <b>Yes</b>                          | <b>No</b>                | <b>N/A</b>               | <b>Section Number</b> |
|-----------------------------------------------------------------------------------------------------------------------------------------------------------------------------------------------|-------------------------------------|--------------------------|--------------------------|-----------------------|
| 12.2 Does the protocol discuss study feasibility?<br>(e.g. study size, anticipated exposure uptake, duration of follow-up in a cohort study, patient recruitment, precision of the estimates) | <input checked="" type="checkbox"/> | <input type="checkbox"/> | <input type="checkbox"/> | p. 16                 |

Comments:

| <b><u>Section 13: Ethical/data protection issues</u></b>                               | <b>Yes</b>                          | <b>No</b>                | <b>N/A</b>                          | <b>Section Number</b> |
|----------------------------------------------------------------------------------------|-------------------------------------|--------------------------|-------------------------------------|-----------------------|
| 13.1 Have requirements of Ethics Committee/ Institutional Review Board been described? | <input checked="" type="checkbox"/> | <input type="checkbox"/> | <input type="checkbox"/>            | p. 17                 |
| 13.2 Has any outcome of an ethical review procedure been addressed?                    | <input type="checkbox"/>            | <input type="checkbox"/> | <input checked="" type="checkbox"/> |                       |
| 13.3 Have data protection requirements been described?                                 | <input checked="" type="checkbox"/> | <input type="checkbox"/> | <input type="checkbox"/>            | p. 17                 |

Comments:

| <b><u>Section 14: Amendments and deviations</u></b>                             | <b>Yes</b>               | <b>No</b>                | <b>N/A</b>                          | <b>Section Number</b> |
|---------------------------------------------------------------------------------|--------------------------|--------------------------|-------------------------------------|-----------------------|
| 14.1 Does the protocol include a section to document amendments and deviations? | <input type="checkbox"/> | <input type="checkbox"/> | <input checked="" type="checkbox"/> |                       |

Comments:

| <b><u>Section 15: Plans for communication of study results</u></b>                          | <b>Yes</b>                          | <b>No</b>                | <b>N/A</b>               | <b>Section Number</b> |
|---------------------------------------------------------------------------------------------|-------------------------------------|--------------------------|--------------------------|-----------------------|
| 15.1 Are plans described for communicating study results (e.g. to regulatory authorities)?  | <input checked="" type="checkbox"/> | <input type="checkbox"/> | <input type="checkbox"/> | p. 17                 |
| 15.2 Are plans described for disseminating study results externally, including publication? | <input checked="" type="checkbox"/> | <input type="checkbox"/> | <input type="checkbox"/> | p. 17                 |

Comments:

Name of the main author of the protocol: BERTHE Pauline

Date: 07/04/2022

Signature: 

**The RECORD statement – checklist of items, extended from the STROBE statement, that should be reported in observational studies using routinely collected health data.**

|                           | Item No. | STROBE items                                                                                                                                                                               | Location in manuscript where items are reported | RECORD items                                                                                                                                                                                                                                                                                                                                                                                                                                | Location in manuscript where items are reported |
|---------------------------|----------|--------------------------------------------------------------------------------------------------------------------------------------------------------------------------------------------|-------------------------------------------------|---------------------------------------------------------------------------------------------------------------------------------------------------------------------------------------------------------------------------------------------------------------------------------------------------------------------------------------------------------------------------------------------------------------------------------------------|-------------------------------------------------|
| <b>Title and abstract</b> |          |                                                                                                                                                                                            |                                                 |                                                                                                                                                                                                                                                                                                                                                                                                                                             |                                                 |
|                           | 1        | (a) Indicate the study's design with a commonly used term in the title or the abstract (b) Provide in the abstract an informative and balanced summary of what was done and what was found |                                                 | RECORD 1.1: The type of data used should be specified in the title or abstract. When possible, the name of the databases used should be included.<br><br>RECORD 1.2: If applicable, the geographic region and timeframe within which the study took place should be reported in the title or abstract.<br><br>RECORD 1.3: If linkage between databases was conducted for the study, this should be clearly stated in the title or abstract. | Pages 1 and 4                                   |
| <b>Introduction</b>       |          |                                                                                                                                                                                            |                                                 |                                                                                                                                                                                                                                                                                                                                                                                                                                             |                                                 |
| Background rationale      | 2        | Explain the scientific background and rationale for the investigation being reported                                                                                                       |                                                 |                                                                                                                                                                                                                                                                                                                                                                                                                                             | Pages 6, 7 and 8                                |
| Objectives                | 3        | State specific objectives, including any prespecified hypotheses                                                                                                                           |                                                 |                                                                                                                                                                                                                                                                                                                                                                                                                                             | Page 9                                          |
| <b>Methods</b>            |          |                                                                                                                                                                                            |                                                 |                                                                                                                                                                                                                                                                                                                                                                                                                                             |                                                 |
| Study Design              | 4        | Present key elements of study design early in the paper                                                                                                                                    |                                                 |                                                                                                                                                                                                                                                                                                                                                                                                                                             | Pages 9 and 10                                  |
| Setting                   | 5        | Describe the setting, locations, and relevant dates, including periods of recruitment, exposure, follow-up, and data collection                                                            |                                                 |                                                                                                                                                                                                                                                                                                                                                                                                                                             | Pages 10, 11 and 12                             |

|                                                                                                                                                                                                            |          |                                                                                                                                                                                                                                                                                                                                                                                                                                                                                                                                                                                                                                                                                                                        |  |                                                                                                                                                                                                                                                                                                                                                                                                                                                                                                                                                                                                                                                                                                      |                                            |
|------------------------------------------------------------------------------------------------------------------------------------------------------------------------------------------------------------|----------|------------------------------------------------------------------------------------------------------------------------------------------------------------------------------------------------------------------------------------------------------------------------------------------------------------------------------------------------------------------------------------------------------------------------------------------------------------------------------------------------------------------------------------------------------------------------------------------------------------------------------------------------------------------------------------------------------------------------|--|------------------------------------------------------------------------------------------------------------------------------------------------------------------------------------------------------------------------------------------------------------------------------------------------------------------------------------------------------------------------------------------------------------------------------------------------------------------------------------------------------------------------------------------------------------------------------------------------------------------------------------------------------------------------------------------------------|--------------------------------------------|
| <p>1<br/>2<br/>3<br/>4<br/>5<br/>6<br/>7<br/>8<br/>9<br/>10<br/>11<br/>12<br/>13<br/>14<br/>15<br/>16<br/>17<br/>18<br/>19<br/>20<br/>21<br/>22<br/>23<br/>24<br/>25<br/>26<br/>27</p> <p>Participants</p> | <p>6</p> | <p>(a) <i>Cohort study</i> - Give the eligibility criteria, and the sources and methods of selection of participants. Describe methods of follow-up<br/> <i>Case-control study</i> - Give the eligibility criteria, and the sources and methods of case ascertainment and control selection. Give the rationale for the choice of cases and controls<br/> <i>Cross-sectional study</i> - Give the eligibility criteria, and the sources and methods of selection of participants</p> <p>(b) <i>Cohort study</i> - For matched studies, give matching criteria and number of exposed and unexposed<br/> <i>Case-control study</i> - For matched studies, give matching criteria and the number of controls per case</p> |  | <p>RECORD 6.1: The methods of study population selection (such as codes or algorithms used to identify subjects) should be listed in detail. If this is not possible, an explanation should be provided.</p> <p>RECORD 6.2: Any validation studies of the codes or algorithms used to select the population should be referenced. If validation was conducted for this study and not published elsewhere, detailed methods and results should be provided.</p> <p>RECORD 6.3: If the study involved linkage of databases, consider use of a flow diagram or other graphical display to demonstrate the data linkage process, including the number of individuals with linked data at each stage.</p> | <p>Pages 10 and 11, and in table 2</p>     |
| <p>28<br/>29<br/>30<br/>31<br/>32<br/>33<br/>34</p> <p>Variables</p>                                                                                                                                       | <p>7</p> | <p>Clearly define all outcomes, exposures, predictors, potential confounders, and effect modifiers. Give diagnostic criteria, if applicable.</p>                                                                                                                                                                                                                                                                                                                                                                                                                                                                                                                                                                       |  | <p>RECORD 7.1: A complete list of codes and algorithms used to classify exposures, outcomes, confounders, and effect modifiers should be provided. If these cannot be reported, an explanation should be provided.</p>                                                                                                                                                                                                                                                                                                                                                                                                                                                                               | <p>Pages 10, 11, 12, 14 and in table 2</p> |
| <p>35<br/>36<br/>37<br/>38<br/>39<br/>40<br/>41<br/>42</p> <p>Data sources/<br/>measurement</p>                                                                                                            | <p>8</p> | <p>For each variable of interest, give sources of data and details of methods of assessment (measurement). Describe comparability of assessment methods if there is more than one group</p>                                                                                                                                                                                                                                                                                                                                                                                                                                                                                                                            |  |                                                                                                                                                                                                                                                                                                                                                                                                                                                                                                                                                                                                                                                                                                      | <p>Pages 10 to 14</p>                      |

|                                                                                                                                                    |                                  |    |                                                                                                                                                                                                                                                                                                                                                                                                                                                                                                                                                                      |                                                                                                                                                       |                      |
|----------------------------------------------------------------------------------------------------------------------------------------------------|----------------------------------|----|----------------------------------------------------------------------------------------------------------------------------------------------------------------------------------------------------------------------------------------------------------------------------------------------------------------------------------------------------------------------------------------------------------------------------------------------------------------------------------------------------------------------------------------------------------------------|-------------------------------------------------------------------------------------------------------------------------------------------------------|----------------------|
| 1<br>2<br>3<br>4                                                                                                                                   | Bias                             | 9  | Describe any efforts to address potential sources of bias                                                                                                                                                                                                                                                                                                                                                                                                                                                                                                            |                                                                                                                                                       | Pages 9, 10          |
| 5<br>6<br>7<br>8<br>9                                                                                                                              | Study size                       | 10 | Explain how the study size was arrived at                                                                                                                                                                                                                                                                                                                                                                                                                                                                                                                            |                                                                                                                                                       | Page 16              |
| 10<br>11<br>12<br>13<br>14<br>15<br>16<br>17<br>18<br>19<br>20<br>21<br>22<br>23<br>24<br>25<br>26<br>27<br>28<br>29<br>30<br>31<br>32<br>33<br>34 | Quantitative variables           | 11 | Explain how quantitative variables were handled in the analyses. If applicable, describe which groupings were chosen, and why                                                                                                                                                                                                                                                                                                                                                                                                                                        |                                                                                                                                                       | Pages 12, 13, and 14 |
| 35<br>36<br>37<br>38<br>39<br>40<br>41<br>42<br>43<br>44<br>45<br>46<br>47                                                                         | Statistical methods              | 12 | (a) Describe all statistical methods, including those used to control for confounding<br>(b) Describe any methods used to examine subgroups and interactions<br>(c) Explain how missing data were addressed<br>(d) <i>Cohort study</i> - If applicable, explain how loss to follow-up was addressed<br><i>Case-control study</i> - If applicable, explain how matching of cases and controls was addressed<br><i>Cross-sectional study</i> - If applicable, describe analytical methods taking account of sampling strategy<br>(e) Describe any sensitivity analyses |                                                                                                                                                       | Pages 12, 13 and 14  |
|                                                                                                                                                    | Data access and cleaning methods |    | ..                                                                                                                                                                                                                                                                                                                                                                                                                                                                                                                                                                   | RECORD 12.1: Authors should describe the extent to which the investigators had access to the database population used to create the study population. | Pages 10, 11 and 12  |



|                  |    |                                                                                                                                                                                                                                                                                                                                                 |  |                                                                                                                                                                                                                                                                                                                    |  |
|------------------|----|-------------------------------------------------------------------------------------------------------------------------------------------------------------------------------------------------------------------------------------------------------------------------------------------------------------------------------------------------|--|--------------------------------------------------------------------------------------------------------------------------------------------------------------------------------------------------------------------------------------------------------------------------------------------------------------------|--|
|                  |    |                                                                                                                                                                                                                                                                                                                                                 |  | RECORD 12.2: Authors should provide information on the data cleaning methods used in the study.                                                                                                                                                                                                                    |  |
| Linkage          |    | ..                                                                                                                                                                                                                                                                                                                                              |  | RECORD 12.3: State whether the study included person-level, institutional-level, or other data linkage across two or more databases. The methods of linkage and methods of linkage quality evaluation should be provided.                                                                                          |  |
| <b>Results</b>   |    |                                                                                                                                                                                                                                                                                                                                                 |  |                                                                                                                                                                                                                                                                                                                    |  |
| Participants     | 13 | (a) Report the numbers of individuals at each stage of the study ( <i>e.g.</i> , numbers potentially eligible, examined for eligibility, confirmed eligible, included in the study, completing follow-up, and analysed)<br>(b) Give reasons for non-participation at each stage.<br>(c) Consider use of a flow diagram                          |  | RECORD 13.1: Describe in detail the selection of the persons included in the study ( <i>i.e.</i> , study population selection) including filtering based on data quality, data availability and linkage. The selection of included persons can be described in the text and/or by means of the study flow diagram. |  |
| Descriptive data | 14 | (a) Give characteristics of study participants ( <i>e.g.</i> , demographic, clinical, social) and information on exposures and potential confounders<br>(b) Indicate the number of participants with missing data for each variable of interest<br>(c) <i>Cohort study</i> - summarise follow-up time ( <i>e.g.</i> , average and total amount) |  |                                                                                                                                                                                                                                                                                                                    |  |
| Outcome data     | 15 | <i>Cohort study</i> - Report numbers of outcome events or summary measures over time<br><i>Case-control study</i> - Report numbers in each exposure                                                                                                                                                                                             |  |                                                                                                                                                                                                                                                                                                                    |  |

|                   |    |                                                                                                                                                                                                                                                                                                                                                                                                                 |  |                                                                                                                                                                                                                                                                                                          |         |
|-------------------|----|-----------------------------------------------------------------------------------------------------------------------------------------------------------------------------------------------------------------------------------------------------------------------------------------------------------------------------------------------------------------------------------------------------------------|--|----------------------------------------------------------------------------------------------------------------------------------------------------------------------------------------------------------------------------------------------------------------------------------------------------------|---------|
|                   |    | category, or summary measures of exposure<br><i>Cross-sectional study</i> - Report numbers of outcome events or summary measures                                                                                                                                                                                                                                                                                |  |                                                                                                                                                                                                                                                                                                          |         |
| Main results      | 16 | (a) Give unadjusted estimates and, if applicable, confounder-adjusted estimates and their precision (e.g., 95% confidence interval). Make clear which confounders were adjusted for and why they were included<br>(b) Report category boundaries when continuous variables were categorized<br>(c) If relevant, consider translating estimates of relative risk into absolute risk for a meaningful time period |  |                                                                                                                                                                                                                                                                                                          |         |
| Other analyses    | 17 | Report other analyses done—e.g., analyses of subgroups and interactions, and sensitivity analyses                                                                                                                                                                                                                                                                                                               |  |                                                                                                                                                                                                                                                                                                          |         |
| <b>Discussion</b> |    |                                                                                                                                                                                                                                                                                                                                                                                                                 |  |                                                                                                                                                                                                                                                                                                          |         |
| Key results       | 18 | Summarise key results with reference to study objectives                                                                                                                                                                                                                                                                                                                                                        |  |                                                                                                                                                                                                                                                                                                          |         |
| Limitations       | 19 | Discuss limitations of the study, taking into account sources of potential bias or imprecision. Discuss both direction and magnitude of any potential bias                                                                                                                                                                                                                                                      |  | RECORD 19.1: Discuss the implications of using data that were not created or collected to answer the specific research question(s). Include discussion of misclassification bias, unmeasured confounding, missing data, and changing eligibility over time, as they pertain to the study being reported. | Page 19 |
| Interpretation    | 20 | Give a cautious overall interpretation of results considering objectives,                                                                                                                                                                                                                                                                                                                                       |  |                                                                                                                                                                                                                                                                                                          |         |

|                                                           |    |                                                                                                                                                               |  |                                                                                                                                                          |         |
|-----------------------------------------------------------|----|---------------------------------------------------------------------------------------------------------------------------------------------------------------|--|----------------------------------------------------------------------------------------------------------------------------------------------------------|---------|
|                                                           |    | limitations, multiplicity of analyses, results from similar studies, and other relevant evidence                                                              |  |                                                                                                                                                          |         |
| Generalisability                                          | 21 | Discuss the generalisability (external validity) of the study results                                                                                         |  |                                                                                                                                                          |         |
| <b>Other Information</b>                                  |    |                                                                                                                                                               |  |                                                                                                                                                          |         |
| Funding                                                   | 22 | Give the source of funding and the role of the funders for the present study and, if applicable, for the original study on which the present article is based |  |                                                                                                                                                          | Page 20 |
| Accessibility of protocol, raw data, and programming code |    | ..                                                                                                                                                            |  | RECORD 22.1: Authors should provide information on how to access any supplemental information such as the study protocol, raw data, or programming code. |         |

\*Reference: Benchimol EI, Smeeth L, Guttman A, Harron K, Moher D, Petersen I, Sørensen HT, von Elm E, Langan SM, the RECORD Working Committee. The REporting of studies Conducted using Observational Routinely-collected health Data (RECORD) Statement. *PLoS Medicine* 2015; in press.

\*Checklist is protected under Creative Commons Attribution ([CC BY](https://creativecommons.org/licenses/by/4.0/)) license.

# BMJ Open

## Oral Janus kinase inhibitors and venous thromboembolic events in atopic dermatitis: protocols for a case-time control study and a nested case-control study based on the French national health insurance (SNDS) cohort.

|                                 |                                                                                                                                                                                                                                                                                                                                                                                                                                                                                                                                                                                                                                                          |
|---------------------------------|----------------------------------------------------------------------------------------------------------------------------------------------------------------------------------------------------------------------------------------------------------------------------------------------------------------------------------------------------------------------------------------------------------------------------------------------------------------------------------------------------------------------------------------------------------------------------------------------------------------------------------------------------------|
| Journal:                        | <i>BMJ Open</i>                                                                                                                                                                                                                                                                                                                                                                                                                                                                                                                                                                                                                                          |
| Manuscript ID                   | bmjopen-2021-059979.R2                                                                                                                                                                                                                                                                                                                                                                                                                                                                                                                                                                                                                                   |
| Article Type:                   | Protocol                                                                                                                                                                                                                                                                                                                                                                                                                                                                                                                                                                                                                                                 |
| Date Submitted by the Author:   | 10-Jul-2022                                                                                                                                                                                                                                                                                                                                                                                                                                                                                                                                                                                                                                              |
| Complete List of Authors:       | BERTHE, Pauline; CHU Rennes, Scailteux, Lucie-Marie ; CHU Rennes, Pharmacovigilance and Pharmacoepidemiology<br>Lescoat, Alain; CHU Rennes, Internal Medicine & Clinical Immunology<br>STAUMONT, DELPHINE; Lille University Hospital Center, Department of Dermatology<br>Coiffier, Guillaume; CH Dinan<br>Guéret, Pierre; CHU Rennes<br>Dupuy, Alain; Centre Hospitalier Universitaire de Rennes, Department of Dermatology<br>Oger, Emmanuel; CHU Rennes<br>Droitcourt, Catherine; Centre Hospitalier Universitaire de Rennes, Department of Dermatology; Université de Rennes 1, EA 7449 REPERES<br>Pharmacoepidemiology and Health Services Research |
| <b>Primary Subject Heading</b>: | Dermatology                                                                                                                                                                                                                                                                                                                                                                                                                                                                                                                                                                                                                                              |
| Secondary Subject Heading:      | Epidemiology, Pharmacology and therapeutics                                                                                                                                                                                                                                                                                                                                                                                                                                                                                                                                                                                                              |
| Keywords:                       | Adult dermatology < DERMATOLOGY, Eczema < DERMATOLOGY, Thromboembolism < CARDIOLOGY, Risk management < HEALTH SERVICES ADMINISTRATION & MANAGEMENT, CLINICAL PHARMACOLOGY                                                                                                                                                                                                                                                                                                                                                                                                                                                                                |
|                                 |                                                                                                                                                                                                                                                                                                                                                                                                                                                                                                                                                                                                                                                          |

SCHOLARONE™  
Manuscripts

**Title:** Oral Janus kinase inhibitors and venous thromboembolic events in atopic dermatitis: protocols for a case-time control study and a nested case-control study based on the French national health insurance (SNDS) cohort.

**Authors:** Pauline BERTHE<sup>1</sup>, MD; Lucie-Marie SCAILTEUX<sup>2,3</sup>, PharmD, PhD; Alain LESCOAT<sup>4,5</sup>, MD, PhD; Delphine STAUMONT-SALLE<sup>6,7</sup>, MD, PhD; Guillaume COIFFIER<sup>8,9</sup>, MD; Pierre GUERET<sup>10</sup>; MD, PhD; Alain DUPUY<sup>1,2</sup>, MD, PhD; Emmanuel OGER<sup>2,3</sup>, MD, PhD; Catherine DROITCOURT<sup>1,2</sup> MD, PhD.

<sup>1</sup>Department of Dermatology, CHU Rennes, F-35000 Rennes, France

<sup>2</sup>University of Rennes, EA 7449 REPERES “Pharmacoepidemiology and Health Services Research”, F-35000 Rennes, France

<sup>3</sup>Pharmacovigilance, Pharmacoepidemiology and Drug Information Centre, Department of Clinical Pharmacology, Rennes University Hospital, F-35000 Rennes, France

<sup>4</sup>Department of Internal Medicine and Clinical Immunology, CHU Rennes, F-35000 Rennes, France

<sup>5</sup>University of Rennes, CHU Rennes, Inserm, EHESP, Irset (Institut de recherche en santé, environnement et travail) - UMR\_S 1085, F-35000Rennes, France

<sup>6</sup>Department of Dermatology, CHU Lille, F-59000 Lille, France

<sup>7</sup>University of Lille, U1286 Inserm INFINITE (Institute for Translational Research in Inflammation), F-59000 Lille, France

<sup>8</sup>Department of Rheumatology, CH Dinan, F-22100 Dinan, France

<sup>9</sup>Department of Rheumatology, CHU Rennes, INSERM, INRA, Institut NUMECAN (Nutrition Metabolism and Cancer), F-35000Rennes, France

<sup>10</sup>Haemostasis Department, CHU Rennes, F-35000 Rennes, France

**Corresponding author:** Dr Pauline BERTHE, Department of Dermatology, Pontchaillou Hospital, 2 rue Henri le Guilloux, F-35000 Rennes, France, Tel: + 33-299-284-349, Fax: + 33-299-284-100, E-mail: pauline.berthe@chu-rennes.fr

Manuscript word count: 4371/4000

Abstract word count: 299/300

References: 80

1  
2  
3 Figures: 3  
4

5 Tables: 3  
6

7 Supplementary materials: 2  
8

9 **Attachments:** ENCePP checklist for study protocols, RECORD checklist  
10

11 **Funding sources:** This research did not receive any specific funding from agencies or  
12 organizations in the public, commercial, or not-for-profit sectors.  
13

14 **Conflicts of Interest:** None with regard to the present work.  
15

16 **Keywords:** JAK inhibitor, venous thromboembolic event, health insurance database  
17  
18  
19  
20  
21  
22  
23  
24  
25  
26  
27  
28  
29  
30  
31  
32  
33  
34  
35  
36  
37  
38  
39  
40  
41  
42  
43  
44  
45  
46  
47  
48  
49  
50  
51  
52  
53  
54  
55  
56  
57  
58  
59  
60

### Abbreviations

Ankylosing spondylitis (AS)

Atopic dermatitis (AD)

Anatomical Therapeutic Chemical (ATC)

Confidence interval (CI)

Crohn's disease (CD)

European Medicines Agency (EMA)

Incidence rate (IR)

International Classification of Diseases, 10th Revision (ICD-10)

Odds ratio (OR)

Psoriatic arthritis (PsA)

Rheumatoid arthritis (RA)

Signal transducer and activator of transcription (STAT)

Système National des Données de Santé (SNDS)

Ulcerative colitis (UC)

Venous thromboembolic event (VTE)

## **Abstract**

### ***Introduction:***

Atopic dermatitis (AD) is a highly prevalent, chronic, inflammatory skin disease. Several orally administered Janus kinase inhibitors (JAKis, including baricitinib, upadacitinib and abrocitinib) have received a marketing authorization for AD.

Clinical trials in rheumatoid arthritis (RA) have flagged up a potential risk of JAKi-induced venous thromboembolic events (VTEs). Accordingly, the summary of product characteristics for a JAKi must mention VTEs as potential adverse drug reactions. In contrast to RA, AD per se is not associated with an elevated risk of VTEs. Assessing this potential risk among AD patients would shed further light on the putative underlying relationship between JAKis and VTEs.

Our research question is to investigate whether JAKis administration increases the risk of VTEs in adults with AD. Our primary objective is to assess the risk of VTEs in adults with AD exposed to JAKis comparing to AD adults not exposed to JAKis, and our secondary objective is to evaluate whether JAKis initiation acts as a trigger of VTEs in adults with AD within three months.

### ***Methods and analysis:***

Hence, we have designed (i) a nested case-control study and (ii) a case-time-control study in a cohort of adults with AD with data from the French national health insurance system (2017-2025).

Here, we describe the study protocol, our methodological choices, and certain novel aspects - including the combined value of the two assumptions, and the use of an exhaustive national health insurance database with potentially greater statistical power for studying rare events in the population of AD patients at a low risk of VTEs (thus limiting the influence of confounding factors).

### ***Ethics and dissemination:***

The protocol has been approved by an independent ethics committee and registered with the French National Data Protection Commission. The study's findings will be published in peer-reviewed scientific journals and presented at international conferences.



### Article Summary: strengths and limitations of this study

The strengths of this study protocol are:

- a population-based study using the exhaustive French national health insurance database would provide additional insight into the risk of venous thromboembolic events (VTEs). Advantageously, this nationwide study should be able to exhaustively identify VTEs, the time of their occurrence, and prescriptions of JAK inhibitors.
- By studying atopic dermatitis (AD), we hope to avoid a major source of confounding bias; in contrast to rheumatoid arthritis, AD is not associated *per se* with an elevated risk of VTEs.

The limitations of this study protocol (based on the use of French national health insurance database) include:

- a lack of data on certain risk factors for VTEs (including obesity and a family history of thromboembolic disease)
- a potential lack of statistical power.

## INTRODUCTION

Atopic dermatitis (AD) is a highly prevalent, pruritic, inflammatory disease skin that occurs in both adults (3 to 10%) (1–3) and children (15 to 20%) (1,4,5). Approximately 2 to 8% of adults with AD have severe forms; the associated impairments in quality of life make AD a disabling disease. Severe AD is frequently associated with other atopic comorbidities (e.g. asthma, allergic rhinitis, allergic conjunctivitis, and food allergy), and may be associated with psychiatric disorders.

The European guidelines on the management of AD in adults recommend first-line treatment with topical anti-inflammatory drugs (topical corticosteroids and tacrolimus) and then (if the treatment fails) systemic immunosuppressants (6,7). In late 2017, the management of treatment-refractory AD was revolutionized by the marketing of the first biologic drug, dupilumab (a subcutaneously administered monoclonal antibody against the interleukin -4 and -13 receptors) (8,9). Other systemic treatments have since received (or are awaiting) marketing authorization: baricitinib (an orally administered Janus kinase (Jak) 1 and 2 inhibitor (JAKi) (10–13), upadacitinib (an orally administered JAK1 inhibitor) (14–16), abrocitinib (another orally administered JAK1 inhibitor) (17–19), and tralokinumab (a subcutaneously administered anti-interleukin-13 monoclonal antibody) (20,21).

JAKis constitute a new family of orally administered molecules that target the JAK-signal transducer and activator of transcription (STAT) pathway. Janus kinases are involved in the transduction of intracellular signals in response to various cytokines and growth factors involved in haematopoiesis, inflammation, and immune functions.

In the European Union, baricitinib was approved for the treatment of active, moderate-to-severe rheumatoid arthritis (RA) in adults in 2017 and for moderate-to-severe AD in adults who are candidates for systemic drug treatment in 2021. Upadacitinib was approved for the treatment of adults with moderate-to-severe active RA, psoriatic arthritis (PsA), or ankylosing spondylitis (AS) in 2020 and 2021 and for the treatment of moderate-to-severe AD in adults and adolescents (aged 12 or over) who are candidates for systemic drug treatment in August 2021. Lastly, abrocitinib was approved very recently by the European Medicines Agency (EMA) for the systemic treatment of moderate-to-severe AD in adults and adolescents.

Clinical trials in RA have flagged up a potential risk of JAKi-induced venous thromboembolic events (VTEs, including deep vein thrombosis and pulmonary embolism) (22–26). Although the EMA approved low (2 mg) and high (4 mg) doses of baricitinib, the FDA only approved the 2 mg dose because of the VTE risk. On a broader scale, the summary of product

1  
2  
3 characteristics for a JAKi must mention VTEs as potential adverse drug reactions. The safety  
4 profiles of baricitinib and upadacitinib in patients with RA have been described in nine and five  
5 clinical studies, respectively. The estimated incidence of VTEs ranged from 0.3 to 0.6 per 100  
6 person-years (22,27).  
7  
8  
9

10 Due to the presence of systemic inflammation, RA *per se* can induce thromboembolic events,  
11 and the treatment of RA with anti-inflammatory drugs helps to reduce the cardiovascular and  
12 thromboembolic risk (25,28). Furthermore, most patients with RA are aged over 50 at diagnosis  
13 and have higher prevalence of obesity and a higher incidence of VTEs. In this case, the interplay  
14 between RA, JAKis and thromboembolic risk is particularly difficult to characterize.  
15  
16  
17  
18

19 The pathogenic links between JAKis and a potentially greater risk of thromboembolic disease  
20 are poorly understood, and the literature data are contradictory. The potential thromboembolic  
21 risk might be related to an imbalance between pro and anti-thrombotic signals, including the  
22 inhibition of pro-inflammatory signals (such as interferon-dependant pathways) and the  
23 paradoxical inhibition of JAK-STAT-dependant anti-inflammatory pathways (such as the IL-  
24 10 pathway that helps to limit clot formation under normal conditions) (29,30). JAKis that  
25 influence JAK2-dependent signalling (such as baricitinib) might also promote platelet  
26 formation from megakaryocytes, as evidenced by a transient increase in the platelet count  
27 following JAKi initiation. Nonetheless, a causal link between transient thrombocytosis and  
28 VTE has never been proven (22).  
29  
30  
31  
32  
33  
34  
35

36 The results of meta-analyses of the links between JAKis and the risk of thromboembolic and/or  
37 cardiovascular events are summarized in Table 1 (31–37).  
38  
39  
40  
41  
42  
43  
44  
45  
46  
47  
48  
49  
50  
51  
52  
53  
54  
55  
56  
57  
58  
59  
60

**Table 1: List of meta-analyses on the risk of VTEs during treatment with JAKis**

| First Author         | Date of publication | JAK inhibitor                                                                                               | Indication                                                      | Number of studies included | Type of studies included | Number of patients included | Median follow-up (weeks)                                        | Number of events among exposed participants | Number of events among nonexposed participants | Results OR (95%CI)                                                                                                                                                                                                             | Methods used                                                                                        |
|----------------------|---------------------|-------------------------------------------------------------------------------------------------------------|-----------------------------------------------------------------|----------------------------|--------------------------|-----------------------------|-----------------------------------------------------------------|---------------------------------------------|------------------------------------------------|--------------------------------------------------------------------------------------------------------------------------------------------------------------------------------------------------------------------------------|-----------------------------------------------------------------------------------------------------|
| Xie (31)             | 2019                | Tofacitinib<br>Baricitinib<br>Upadacitinib<br>Peficitinib<br>Decernotinib                                   | RA                                                              | 26                         | RCT                      | 11799                       | Placebo-controlled period: 12<br><br>Dose-comparison period: 24 | 12                                          | 3                                              | All JAKis: 1.16 (0.48-2.81)<br>Tofacitinib: 0.17 (0.03-1.05)<br>Baricitinib: 2.33 (0.62-8.75)<br>Upadacitinib: 1.77 (0.20-16.00)                                                                                               | Mantel-Haenszel fixed-effect method                                                                 |
| Xie (32)             | 2019                | Tofacitinib                                                                                                 | RA, PsA, CPP, UC, CD, AS                                        | 27                         | RCT                      | 13611                       | Placebo-controlled period: 12<br><br>Dose-comparison period: 24 | 1                                           | 5                                              | 0.03 (0.00-0.21)                                                                                                                                                                                                               | Peto method                                                                                         |
| Olivera (33)         | 2020                | Tofacitinib<br>Upadacitinib<br>Filgotinib<br>Baricitinib                                                    | RA, AS, UC, CD, CPP                                             | 10                         | RCT Cohorts              | 5143                        | 26                                                              | 12                                          | 3                                              | All JAKis: 0.90 (0.32-2.54)                                                                                                                                                                                                    | Random-effects model                                                                                |
| Giménez Poderos (34) | 2020                | Tofacitinib<br>Baricitinib                                                                                  | RA, KT, UC, CPP, CD, PsA, AD, DKD, SLE, JIA, SS                 | 59                         | RCT Cohorts              | 25947                       | 16                                                              | 24                                          | 23                                             | Tofacitinib: 0.29 (0.10-0.84)<br>Baricitinib: 3.39 (0.82-14.04)                                                                                                                                                                | Fixed-effects or random-effects model, with application of the most conservative model in each case |
| Yates (35)           | 2020                | Tofacitinib<br>Baricitinib<br>Upadacitinib<br>Filgotinib                                                    | RA, PsA, AS, UC, CD, CPP                                        | 42                         | RCT                      | 17269                       | unavailable                                                     | 15                                          | 4                                              | All JAKis: 0.68 (0.36-1.29)                                                                                                                                                                                                    | Mantel-Haenszel fixed-effect method                                                                 |
| Wang (36)            | 2020                | Upadacitinib                                                                                                | RA                                                              | 3                          | RCT                      | 2852                        | unavailable                                                     | 3                                           | 1                                              | 2.34 (0.15-15.02)                                                                                                                                                                                                              | Random-effects model                                                                                |
| Bilal (37)           | 2021                | Abrocitinib,<br>Baricitinib,<br>Decernotinib,<br>Filgotinib,<br>Peficitinib,<br>Ruxolitinib,<br>Tofacitinib | RA, AD, SLE, CPP, AS, PsA, UC, Pancreatic cancer, Breast cancer | 29                         | RCT                      | 13910                       | 48                                                              | 50                                          | 27                                             | All JAKis: 0.91 (0.57-1.47)<br>Baricitinib: 1.12 (0.27-4.69)<br>Decernotinib: 1.07 (0.18-6.43)<br>Filgotinib: 2.13 (0.22-20.64)<br>Ruxolitinib: (0.31-2.29)<br>Upadacitinib: 2.25 (0.55-9.25)<br>Tofacitinib: 0.27 (0.08-0.89) | Random-effects model                                                                                |

Abbreviations: AD, atopic dermatitis; AS, ankylosing spondylarthritis; CD, Crohn's disease; CI, confidence interval; CPP, Chronic Plaque Psoriasis; DKD, diabetic kidney disease; IR, incidence rates; JAKi, Janus kinase inhibitor; JIA, juvenile idiopathic arthritis; KT, kidney transplantation; OR, odds ratio; PsA, psoriatic arthritis; RA, rheumatoid arthritis; RCT, randomized clinical trial; SLE, systemic lupus erythematosus; SS, systemic sclerosis; UC, ulcerative colitis.

1  
2  
3  
4 Most of the meta-analyzed data came from clinical trials, rather than real-life studies with a  
5 longer follow-up period. The meta-analyses concluded that although the JAKi treatment is  
6 associated with an elevated risk of VTEs, the association is not statistically significance. Lastly,  
7 the meta-analyses did not encompass data on VTEs treated in primary care facilities (i.e. on an  
8 outpatient basis). Two analyses of US medical-administrative databases did not find a  
9 difference in the VTE risk between patients with RA taking tofacitinib and those taking an anti-  
10 tumour necrosis factor agent (hazard ratio [95% confidence interval (CI)] = 1.13 [0.77-1.65]  
11 and 1.33 [0.78-2.24], respectively) (38,39). However, the researchers could not rule out such a  
12 risk, and only considered VTEs leading to hospital admission (38,39).

13  
14  
15  
16  
17  
18  
19 A population-based study of a health insurance database (the *Système National des Données de*  
20 *Santé*, SNDS) would provide additional insights by focusing on the VTE risk. The advantages  
21 of studying a health insurance database include the precise, national-level identification of JAKi  
22 prescriptions, VTEs, and the time of occurrence (relative to treatment initiation, for example).  
23 Furthermore, studying AD avoids a major source of confounding bias; in contrast to RA and  
24 inflammatory bowel disease, AD is not associated with an increased risk of VTE (40) and  
25 predominantly affects a younger population with a lower prevalence of concomitant  
26 cardiovascular comorbidities or obesity.

27  
28  
29  
30  
31  
32  
33 Here, we describe the protocol for the “JAK inhibitors and ThromboEmbolic Risk” (JAKTER)  
34 study of the association between JAKis and VTEs in AD, using real-world evidence from an  
35 exhaustive French medical-administrative database. We also discuss our methodological  
36 choices. Our primary objective is to assess the risk of VTEs in adults with AD exposed to JAKis  
37 comparing to AD adults not exposed to JAKis, and our secondary objective is to evaluate  
38 whether JAKis initiation acts as a trigger of VTEs in adults with AD within three months,  
39 corresponding to two different methodological approaches.

## 40 41 42 43 44 45 **METHODS AND ANALYSIS**

### 46 47 48 **Overall study design**

49  
50  
51  
52  
53  
54  
55  
56  
57  
58  
59  
60  
The literature data on the temporal relationship between the initiation of treatment with a JAKi  
and the occurrence of a VTE are contradictory. Some studies suggest that the incidence rates of  
VTEs are consistent over time (22), whereas other indicate that the incidence rates are clustered  
soon after the start of exposure (41). The study null hypotheses are formulated as follows: (i)  
VTE risk is equal in adults with AD exposed or not exposed to JAKis, (ii) JAKi initiation does  
not trigger VTE. We will therefore use two different methodological approaches to investigate

1  
2  
3 the VTEs and the JAKis prescribed for AD: (i) a nested case-control study in a cohort of adults  
4 with AD (analysis #1) and (ii) a case-time-control study (analysis #2).

5  
6 The overall study design is summarized in Figure 1.  
7  
8  
9

## 10 **Place and study time**

11  
12 The analysis period will run from January 1<sup>st</sup>, 2017, to August 31<sup>st</sup>, 2025, in France.  
13  
14  
15

## 16 **Data sources**

17  
18 We will analyze the French national health insurance database (*Système National des Données*  
19 *de Santé*, SNDS), which covers 98% of the 66 million people in France. The SNDS database  
20 contains anonymous data on individuals' demographic characteristics (sex, dates of birth, and  
21 (if applicable) date of death); all healthcare reimbursements, including drugs (with the  
22 prescription filling date, the prescriber's medical speciality, laboratory tests, outpatient  
23 care/visits, all hospital stays, and the associated diagnoses (coded according to the International  
24 Classification of Diseases, 10<sup>th</sup> Revision (ICD-10), all causes of death (classified according to  
25 the ICD-10 codes), and the attribution or not of "chronic disease" status ("*affection de longue*  
26 *durée*" (ALD), giving entitlement to the full coverage of related healthcare costs, and again  
27 coded according to ICD-10 codes). Information on medical procedures or biological results are  
28 not available in the SNDS.  
29  
30  
31  
32  
33  
34  
35  
36  
37  
38  
39

## 40 **Selection criteria and constitution of the target cohort**

41 To avoid indication bias and form a homogeneous group of patients in terms of medical care,  
42 we will build up a cohort of adults with AD and who start systemic immunomodulatory  
43 treatment for this disease.  
44  
45

46 In France, AD is a chronic condition that is mostly managed in outpatient settings and not  
47 during hospital stays. Furthermore, AD does not give entitlement to ALD chronic disease status.  
48 All eligible adults (aged 18 or over) with *a priori* AD will be identified as follows:  
49  
50

- 51 - adults (aged 18 or over) with an initial fulfilment of a prescription for dupilumab,  
52 cyclosporine, methotrexate, tralokinumab, or a JAKi (baricitinib, upadacitinib, or  
53 abrocitinib), two or more fulfilments of topical corticosteroids, and a consultation with  
54 a dermatologist between January 1<sup>st</sup>, 2017, and December 31<sup>st</sup>, 2024.  
55  
56  
57  
58  
59  
60

- adults with no fulfilments of dupilumab, cyclosporine, methotrexate, tralokinumab or JAKi (baricitinib, upadacitinib, or abrocitinib) prescriptions in the year prior to cohort entry.
- adults with no other indications for dupilumab, cyclosporine, methotrexate, tralokinumab, or the JAKis baricitinib, upadacitinib, or abrocitinib (i.e. RA, PsA, AS, ulcerative colitis, lupus, organ or bone marrow transplant, nephrotic syndrome, and psoriasis) identified through “ALD” chronic disease status or the hospital discharge ICD-10 codes, between January 1<sup>st</sup>, 2016, and December 31<sup>st</sup>, 2024.
- adults with follow-up starting on the date of the first filled prescription of a JAKi (baricitinib, upadacitinib, or abrocitinib), dupilumab, tralokinumab, cyclosporine, or methotrexate, up until August 31<sup>st</sup>, 2025.

## Outcomes

The primary endpoint is VTE; it is a composite endpoint encompassing pulmonary embolism, managed mostly in hospital and identified through hospital discharge ICD-10 code (Table 2), and deep-vein thrombosis managed mostly in an outpatient setting and identified through a dedicated and validated algorithm (manuscript under review). The cases will be adults with AD and incident deep vein thrombosis or pulmonary embolism, managed in an outpatient setting, a hospital, or an emergency department.

The index date is the date of the VTE.

To study cases of “unprovoked” VTEs, we will exclude the following cases of adults with “provoked” VTEs (42):

- initiation of oral oestrogenic contraceptive in the three months before the index date.
- pregnancy (including a two-month postpartum period) before the index date.
- surgery (orthopaedic surgery involving long bones or the pelvis, or other major surgery) in the four weeks before the index date.
- prolonged hospitalisation (>72 hours) in the four weeks before the index date.
- a diagnosis of cancer (including haematological malignancies but not including non-melanoma skin cancer) before the index date.
- fulfilment of one or more prescriptions for preventive or curative treatments with anticoagulants, including heparins, anti-vitamin K agents, and direct oral anticoagulant

(ensuring the exclusion of patients with a history of VTEs and persistent risk factors for VTE recurrence) before the index date (for VTEs managed in hospital or in an emergency department) or before the index date minus 7 days (for adults starting an anticoagulant treatment before hospitalization for VTE).

## Data analysis

The characteristics of the JAKi-treated population of patients with AD will be described, together with the time interval between JAKi initiation and the occurrence of the VTE. We will explore the risk function and the potential time-varying association.

### *Analysis #1: a nested case-control study of a cohort of adults with AD*

The association between exposure to JAKi and the occurrence of VTEs will be investigated in a nested case-control study of a cohort of adults with AD requiring systemic treatment.

Adults with AD will be considered to have been exposed to JAKi if they have at least one fulfilled prescription for a JAKi prior to the index date. Adults with AD will be assigned to a “JAKi user” category or a “JAKi never-user” category, based on the prior fulfilment closest to the index date. Subgroups of JAKi users will be defined as follows: for current JAKi users, the last prescription will have been fulfilled in the month before the index date; for recent JAKi users, the last prescription will have been fulfilled between one and four months before the index date; and for past JAKi users, the last prescription will have been fulfilled more than four months before the index date. Furthermore, for current JAKi users; the number of JAKi prescription fulfilments and the total cumulative dose of JAKi received before the index date will be calculated.

References will be adults with AD whose most recent prescription fulfilment before the index date (regardless of how long before) will have been for another systemic treatment for AD.

For each case (adults with AD having experienced a VTE), four controls will be selected from the target AD cohort. Controls must not have experienced a VTE at the time of their selection. Cases and controls will be matched for age, sex, and length of exposure at the case’s index date. The inclusion and exclusion criteria applied to cases will be applied to the matched controls. It will be possible for a control to become a case after his/her selection (density sampling) (43). We will estimate odds ratios (ORs) using conditional logistic regression. We will consider systemic treatment of AD as a binary variable: JAKi users (baricitinib, upadacitinib, or



1  
2  
3 abrocitinib) vs. users of other systemic drugs (dupilumab, tralokinumab, cyclosporine, or  
4 methotrexate). We will consider drug exposure as a continuous variable. The primary analysis  
5 will compare current JAKi users with JAKi never-users. The secondary analyses will cover  
6 “recent JAKi user” status, “past JAKi user” status, and use of each individual JAKi (baricitinib,  
7 upadacitinib, and abrocitinib). A Schneeweiss diagram for analysis #1 is shown in Figure 2  
8 (44).  
9  
10  
11  
12  
13  
14

15  
16 ***Analysis #2. A case-only design: a nested case-time-control study of a cohort of adults with***  
17 ***AD.***  
18

19 To evaluate whether or not initiation of a JAKi increases the risk of VTE in the following three  
20 months (i.e. a “triggering effect”), we will perform a case-time-control analysis.  
21  
22

23 In the field of pharmacoepidemiology, case-time-control studies can be used to study an acute,  
24 early-onset adverse event during treatment (45). A VTE is sudden (with a short time interval  
25 between the pathophysiological cause and the clinical manifestations) and is easy to date by  
26 screening for specific treatments and additional investigations (including Doppler ultrasound).  
27 The majority of the VTEs observed in clinical trials (22) or reported in pharmacovigilance  
28 databases (41) occurred within three to four months of JAKi initiation (46). Furthermore, the  
29 case-only design can control for potential confounding factors (such as obesity and physical  
30 activity) not recorded in the French health insurance database.  
31  
32  
33  
34  
35  
36

37 Only AD patients exposed to a JAKi and having experienced a VTE (i.e. cases) will be  
38 analyzed. The case-time-control design compares the exposure status immediately before the  
39 event (the risk period) with exposure during a designated (earlier) reference period. Each VTE  
40 case will serve as his/her own control during a comparison of the risk period (0 to 3 months  
41 before occurrence of the VTE) with the reference period (3 to 6 months before occurrence of  
42 the VTE). Each VTE case will be assessed for exposure (yes/no) during the risk period and  
43 during the reference period. Only participants whose status differs when comparing the two  
44 periods (i.e. discordants) will be considered in our estimation of the OR. To take account of the  
45 expected increase in JAKi prescription, the case-time-control analysis will include a selection  
46 of controls matched with VTE cases. Each VTE case will be matched for age and sex with 5  
47 controls without VTEs and who will be randomly selected from the AD target cohort. The date  
48 of the VTE will be used as the index date for the matched controls. The above-defined risk and  
49 reference periods will be screened for JAKi initiation among the controls in the same way as  
50 among the cases, and a case-crossover OR for controls will be computed. The case-time-control  
51  
52  
53  
54  
55  
56  
57  
58  
59  
60

1  
2  
3 OR [95%CI] will be estimated with a conditional logistic model by considering the interaction  
4 term between the exposure of interest (JAKi initiation) and the participant's status (case or  
5 control). The case-time-control OR will correspond to the ratio between the respective case-  
6 crossover ORs obtained in cases and controls.  
7  
8

9  
10 Sensitivity analyses in which the durations of the risk and reference period are modified will be  
11 performed as follows: the risk period will be defined as 0 to 2 months or 0 to 4 months before  
12 the VTE, and the control period will be defined as 2 to 4 months or 4 to 8 months before the  
13 VTE. Furthermore, sensitivity analysis will be performed for analyses #1 and #2 by changing  
14 the patient selection criteria and excluding patients with asthma. Lastly, we shall exclude  
15 patients having initiated oral oestrogenic contraception in the 6 months or the 12 months  
16 before the date of the VTE in cases or the corresponding date in controls.  
17  
18  
19  
20  
21  
22

### 23 24 **Covariates**

25  
26 We used a directed acyclic graph (Figure 3) to describe covariates, mediators, and potential  
27 confounding factors in the relationship between JAKis and VTEs.  
28

29  
30 The results will be adjusted for several covariates, including the patient's chronic comorbidities  
31 (using Bannay et al.'s algorithm for use of the Charlson Comorbidity Index with an electronic  
32 healthcare database (47,48)) and the use of statins (49) or systemic corticosteroids (50). Obesity  
33 is either not documented or only partially documented in the SNDS database; in Europe, most  
34 adults with AD are not obese (51). The case-only design approach (analysis #2) avoids this  
35 potential confounding factor, since the patient is his/her own control. The SNDS database does  
36 not contain identifiable information on a family history of venous thromboembolic disease.  
37  
38

39  
40 Asthma (the most important atopic comorbidity in AD) will be assessed and defined as follows:  
41 an ICD-10 code J45-J46 and/or at least two fulfilments of a drug for the treatment of obstructive  
42 airway diseases (an Anatomical Therapeutic Chemical (ATC) code of R03). The study variables  
43 are listed in Table 2.  
44  
45  
46  
47  
48  
49  
50  
51  
52  
53  
54  
55  
56  
57  
58  
59  
60

**Table 2: List of variables**

| Variables                                        | Registry     | Code                                                                                                                                                                                                                                                                                                                                                  |
|--------------------------------------------------|--------------|-------------------------------------------------------------------------------------------------------------------------------------------------------------------------------------------------------------------------------------------------------------------------------------------------------------------------------------------------------|
| <b>Atopic dermatitis</b>                         |              |                                                                                                                                                                                                                                                                                                                                                       |
| Atopic dermatitis                                | PMSI         | ICD-10 code L20                                                                                                                                                                                                                                                                                                                                       |
| Topical corticosteroids                          | DCIR         | ATC codes D07AB01, D07AB02, D07AB03, D07AB04, D07AB05, D07AB06, D07AB07, D07AB08, D07AB09, D07AB10, D07AB11, D07AB19, D07AB21, D07AB30, D07AC01, D07AC02, D07AC03, D07AC04, D07AC05, D07AC06, D07AC07, D07AC08, D07AC09, D07AC10, D07AC11, D07AC12, D07AC13, D07AC14, D07AC15, D07AC16, D07AC17, D07AC18, D07AC19, D07AC20, D07AC21, D07AD01, D07AD02 |
| Consultation with a dermatologist                | DCIR         | PFS_SPE_COD or PFE_SPE_COD code 05                                                                                                                                                                                                                                                                                                                    |
| <b>Exposure</b>                                  |              |                                                                                                                                                                                                                                                                                                                                                       |
| Baricitinib                                      | DCIR         | ATC code L04AA37                                                                                                                                                                                                                                                                                                                                      |
| Upadacitinib                                     | DCIR         | ATC code L04AA44                                                                                                                                                                                                                                                                                                                                      |
| Abrocitinib                                      | DCIR         | ATC code D11AH08                                                                                                                                                                                                                                                                                                                                      |
| Dupilumab                                        | DCIR         | ATC code D11AH05                                                                                                                                                                                                                                                                                                                                      |
| Tralokinumab                                     | DCIR         | ATC code D11AH07                                                                                                                                                                                                                                                                                                                                      |
| Cyclosporine                                     | DCIR         | ATC code L04AD01                                                                                                                                                                                                                                                                                                                                      |
| Methotrexate                                     | DCIR         | ATC code L01BA01                                                                                                                                                                                                                                                                                                                                      |
| <b>Venous thromboembolic events</b>              |              |                                                                                                                                                                                                                                                                                                                                                       |
| Venous thromboembolic events                     | PMSI, DCIR   | EPIGETBAM algorithm under submission                                                                                                                                                                                                                                                                                                                  |
| <b>Exclusion criteria</b>                        |              |                                                                                                                                                                                                                                                                                                                                                       |
| Oral oestrogenic                                 | DCIR         | ATC codes G03AA01, G03AA02, G03AA03, G03AA04, G03AA05, G03AA06, G03AA07, G03AA08, G03AA09, G03AA10, G03AA11, G03AA12, G03AA13, G03AA14, G03AA15, G03AA16, G03AB01, G03AB02, G03AB03, G03AB04, G03AB05, G03AB06, G03AB07, G03AB08                                                                                                                      |
| Pregnancy                                        | PMSI         | ICD-10 code Z321                                                                                                                                                                                                                                                                                                                                      |
| Hospital stay >72 hours, with or without surgery | PMSI         | ICD-10 codes                                                                                                                                                                                                                                                                                                                                          |
| Cancer and haematological malignancies           | PMSI         | ICD-10 codes C00 to C43 and C45 to C97, D00 to D03, D05 to D09, D37 to D48, or ALD n°30                                                                                                                                                                                                                                                               |
| Anticoagulant treatment                          | DCIR         | ATC codes B01AA01, B01AA02, B01AA03, B01AA04, B01AA07, B01AA08, B01AA09, B01AA10, B01AA11, B01AA12, B01AB01, B01AB02, B01AB04, B01AB05, B01AB06, B01AB07, B01AB08, B01AB09, B01AB10, B01AB11, B01AB12, B01AB51, B01AE01, B01AE02, B01AE03, B01AE04, B01AE05, B01AE06, B01AE07, B01AF01, B01AF02, B01AF03, B01AX01, B01AX04, B01AX05                   |
| Rheumatoid arthritis                             | PMSI<br>DCIR | ICD-10 codes M069, M0690, M0691, M0692, M0693, M0694, M0695, M0696, M0697, M0698, M0699, M06 or ALD n°22                                                                                                                                                                                                                                              |
| Psoriatic arthritis                              | PMSI<br>DCIR | ICD-10 codes M0700, M0701, M0702, M0703, M0704, M0705, M0706, M0707, M0708, M0709, M072, M0720, M0721, M0722, M0723, M0724, M0725, M0726, M0727, M0728, M0729, M073, M0730, M0734, M0732, M0733, M0734, M0735, M0736, M0737, M0738, M0739                                                                                                             |
| Ulcerative colitis                               | PMSI<br>DCIR | ICD-10 codes K519 or ALD n°24                                                                                                                                                                                                                                                                                                                         |
| Lupus                                            | PMSI<br>DCIR | ICD-10 codes L93, M32 or ALD n°21                                                                                                                                                                                                                                                                                                                     |
| Organ and bone marrow transplants                | PMSI<br>DCIR | ICD-10 codes Z940, Z941, Z942, Z943, Z944, Z945, Z946, Z947, Z948, Z9480, Z94800, Z94801, Z9481, Z9482, Z94802, Z94803, Z94804, Z94809, Z949                                                                                                                                                                                                          |
| Nephrotic syndrome                               | PMSI<br>DCIR | ICD-10 code N04 or ALD n°19                                                                                                                                                                                                                                                                                                                           |
| Psoriasis                                        | PMSI<br>DCIR | ICD-10 code L40, L400, L401, L402, L403, L404, L405, L408, L409                                                                                                                                                                                                                                                                                       |
| Ankylosing spondylitis                           | PMSI         | ICD-10 codes M45, M450, M451, M452, M453, M454, M455, M456, M457, M458, M459 or ALD n°27                                                                                                                                                                                                                                                              |
| <b>Covariates</b>                                |              |                                                                                                                                                                                                                                                                                                                                                       |
| Charlson Comorbidity Index                       | PMSI         | Algorithm developed by Bannay et al. (47)                                                                                                                                                                                                                                                                                                             |
| Systemic corticosteroids                         | DCIR         | ATC codes H02A and H02B                                                                                                                                                                                                                                                                                                                               |
| Asthma                                           | PMSI<br>DCIR | ICD-10 codes J45, J450, J451, J458, J459, J46<br>ATC code R03                                                                                                                                                                                                                                                                                         |
| Statins                                          | DCIR         | ATC codes C10AA, C10B                                                                                                                                                                                                                                                                                                                                 |

Abbreviations: ALD, *affection longue durée* long-term chronic disease status giving entitlement to full coverage of related healthcare costs; ATC, Anatomical Therapeutic Chemical; DCIR, Données de Consommation Inter Régimes; ICD-10, International Classification of Diseases 10th Revision; PMSI, Programme de Médicalisation des Systèmes d'Information.

### Sample size

Based on a frequency of exposure to JAKi among the targeted cohort of 25%, a 1:4 case to control ratio, and a statistical significance threshold of 0.05, the sample sizes required for a power of 80% in a comparison of JAKi exposure in cases vs. controls are as follows: 1836 participants (306 cases and 1530 controls) for detecting an OR of 1.5, 618 participants (103 cases and 515 controls) for detecting an OR of 2, 354 participants (59 cases and 295 controls) for detecting an OR of 2.5, 246 participants (41 cases and 205 controls) for detecting an OR of 3, and 192 participants (32 cases and 160 controls) for detecting an OR of 3.5. These calculations do not take account of matching, which will tend to increase the power in an unknown manner. The estimated power calculation is given in Table 3. A final power calculation will be performed at the end of the study.

**Table 3: Power calculation for analysis #1**

| Frequency of exposure to JAKis in the targeted cohort | Odds ratio | Nominal power | Number of controls | Number of cases | Total number of participants |
|-------------------------------------------------------|------------|---------------|--------------------|-----------------|------------------------------|
| 0.50                                                  | 1.5        | 0.8           | 1275               | 255             | 1530                         |
| 0.50                                                  | 2.0        | 0.8           | 465                | 93              | 558                          |
| 0.50                                                  | 3.0        | 0.8           | 205                | 41              | 246                          |
| 0.25                                                  | 1.5        | 0.8           | 1530               | 306             | 1836                         |
| 0.25                                                  | 2.0        | 0.8           | 515                | 103             | 618                          |
| 0.25                                                  | 2.5        | 0.8           | 295                | 59              | 354                          |
| 0.25                                                  | 3.0        | 0.8           | 205                | 41              | 246                          |
| 0.25                                                  | 3.5        | 0.8           | 160                | 32              | 192                          |

Abbreviations: JAKis, Janus kinase inhibitors

The estimated incidence of thromboembolic diseases in France is one per 1000 per year; approximately 50,000 adults with a follow-up of three years are required. The target population for baricitinib/upadacitinib has been estimated at between 26,500 and 42,500 by the French High Authority for Health (52); this is almost certainly an underestimate, given that courses of treatment with cyclosporine are short.

### Patient and Public Involvement

A patient will join the independent scientific committee and will participate in the discussion of the results. This patient is Stéphanie Mehrand who is the Director of the French Eczema

1  
2  
3 Association (<https://www.associationeczema.fr/>). Once the study will be published, patients  
4 with AD who are members of the association will be informed of the results in the form of  
5 newsletter suitable for a non-specialist audience, through the website of the association.  
6  
7  
8  
9

## 10 **ETHICS AND DISSEMINATION**

11  
12 In accordance with French legislation, the protocol has been approved by an independent ethics  
13 committee (*Comité éthique et scientifique pour les recherches, les études et les évaluations*  
14 *dans le domaine de la santé*, Paris, France; reference: 4523600, dated June 17<sup>th</sup>, 2021) and has  
15 been registered with the French National Data Protection Commission (*Commission Nationale*  
16 *de l'Informatique et des Libertés*, Paris, France; reference: 921265, dated June 28<sup>th</sup>, 2021). The  
17 study's findings will be published in peer-reviewed scientific journals and presented at  
18 international conferences  
19  
20  
21  
22  
23

24 The data will be consulted via the French national health insurance system's (*Caisse Nationale*  
25 *de l'Assurance Maladie*) portal; the investigators' access is restricted to the scope of the study.  
26 The data were not extracted from the main database but were analyzed in a dedicated project  
27 area on the server. The investigators will comply with the reference framework applicable to  
28 the SNDS database (as set out in the government act dated March 22<sup>nd</sup>, 2017).  
29  
30  
31  
32

33 The study protocol has been registered at France's Health Data Hub ([www.health-data-hub.fr](http://www.health-data-hub.fr)).  
34 The statistical analysis plan and data management book will now be drafted. The first results  
35 are expected in late 2025. The study's findings will be published in peer-reviewed scientific  
36 journals and presented at international conferences  
37  
38  
39  
40  
41

## 42 **DISCUSSION**

43  
44 A population-based study of a cohort of AD adults documented in the SNDS French national  
45 health insurance database should provide additional insights on the potential association  
46 between VTE and JAKis (baricitinib, upadacitinib, and abrocitinib).  
47  
48  
49

50 There are several possible pathophysiological explanations for an elevated risk of VTE during  
51 treatment with a JAKi. Firstly, the leading hypothesis states that the thrombogenic effect is  
52 related to the thrombocytosis associated with baricitinib use (22). However, a clear time-domain  
53 or quantitative association between the platelet count and the occurrence of VTE has not been  
54 observed (22). Furthermore, elevation of the platelet count is not observed in people treated  
55 with other JAKis, including upadacitinib (53). Secondly, the JAK 2 pathway has an important  
56  
57  
58  
59  
60

1  
2  
3 role in haematopoiesis and might promote VTE. Paradoxically, inhibition of the JAK2 pathway  
4 by JAKis does not account for the occurrence of VTE: in Vaquez disease and essential  
5 thrombocythemia, an activating mutation in JAK 2 increases the risk of arterial and venous  
6 thrombotic events (54). Data from mouse models suggest that JAK V617F expression induces  
7 hypersensitivity to fibrinogen, thrombopoietin, and other endogenous pro-thrombogenic factors  
8 (55).  
9

10  
11  
12  
13 The literature data on the potential risk are contradictory and do not enable a firm conclusion  
14 about the association between JAKis and VTE to be drawn. A false association might result  
15 from methodological bias. For example, selection bias occurs when including patients who have  
16 received several courses of systemic treatment (and so might have more severe disease and a  
17 higher thromboembolic risk) are included in clinical trials (especially in open-label trials in RA)  
18 (22,24). Confounding bias may occur because the disease treated with JAKi is itself associated  
19 with a higher risk of VTE; this is particularly true for RA. Indeed, the thromboembolic risk is  
20 known to be two to three times higher in patients with RA (25) than in the general population  
21 (28,56). The baseline risk also appears to be elevated other systemic inflammatory diseases,  
22 including inflammatory bowel disease (57,58). In contrast, adults managed for moderate-to-  
23 severe AD are not known to have an elevated thromboembolic risk and are also younger than  
24 patients with RA; hence, the baseline risk of VTEs is lower. Published data on this indication  
25 are scarce: the only two meta-analyses included data from four randomized clinical trials  
26 evaluating the efficacy of baricitinib and abrocitinib in AD (34). The lack of a significant  
27 association might have several explanations: (i) a lack of power would apply if the number of  
28 JAKi-exposed patients experiencing a VTE is low; meta-analyses have provided inconclusive  
29 results, due the rarity of the event and the predominant inclusion of clinical trial data; (ii)  
30 insufficient follow-up in clinical trials (given the latency between JAKi initiation and VTE  
31 occurrence); and (iii) a lack of specific detection of VTEs (requiring a targeted initial  
32 assessment and follow-up, and perhaps a longer follow-up period). Lastly, it is unclear whether  
33 the published studies considered only VTEs leading to a hospitalization or, in contrast, all  
34 VTEs. In France, the majority of VTEs are managed in an outpatient setting (59).  
35  
36  
37  
38  
39  
40  
41  
42  
43  
44  
45  
46  
47  
48  
49  
50

51  
52 Our implementation of two complementary methodological approaches should shed more light  
53 on this question. The case-control study is carried out on a population of AD patients with  
54 similar disease severity levels and receiving similar intensities of systemic treatment. This  
55 design assumes that after initiation of a JAKi, the risk of a VTE is constant. The case-time-  
56 control design will be applied to address (i) the assumption whereby a JAKi triggers a VTE,  
57  
58  
59  
60

1  
2  
3 and (ii) the issue of residual confounding factors. This study design is particularly suitable when  
4 the outcome is sudden and easily dated, as is the case here (60–62). The hypothetical triggering  
5 effect is based on (i) the transient thrombocytosis observed with baricitinib early after treatment  
6 initiation (63,64), (ii) pharmacovigilance data from France and North America (41,46), where  
7 more than half of the reported VTEs occurred within 120 days of JAKi initiation (46), and (iii)  
8 the fact that other drugs (such as contraceptives) can trigger VTEs (65–69). An increase over  
9 the study period in the prevalence of JAKi use for AD is expected; the case-time-control design  
10 considers time-trends in the prevalence of exposure that might introduce a confounding effect  
11 in a case-crossover design. We chose to study “unprovoked” VTEs by excluding well-known  
12 risk factors for thromboembolic disease (70), such as cancer (71), surgery (72), immobilisation  
13 (proxy marker: a hospital stay), hospital admission (73), and the initiation of hormone therapy  
14 (74). Furthermore, we will adjust for the Charlson Comorbidity Index, which includes diabetes  
15 (75–78). However, obesity, black ethnicity (79), and a family history of thromboembolic  
16 disease are not documented in the SNDS database, and so we cannot rule out residual  
17 confounding in analysis #1 (the nested case-control study). In analysis #2 (the case-only  
18 design), cases serve as their own controls, which can mitigate the potential confounding factors  
19 (such as diet, smoking, the level of physical activity, and a family history of thromboembolic  
20 disease) not documented in healthcare databases (45,80).

21  
22  
23  
24  
25  
26  
27  
28  
29  
30  
31  
32  
33  
34  
35  
36  
37  
38  
39  
40  
41  
42  
43  
44  
45  
46  
47  
48  
49  
50  
51  
52  
53  
54  
55  
56  
57  
58  
59  
60  
Our study has several potential strengths, including the exhaustive nationwide coverage of the  
French population (thereby enabling an assessment of rare events and providing potentially  
greater statistical power); the theoretical absence of selection bias, given our use of the SNDS  
database; the quality of the recorded data (enabling estimation of the time of occurrence of  
VTEs); the implementation of two complementary methodological approaches; and the  
definitions of outcomes that encompass VTEs managed in out- and inpatient settings.

The study’s potential limitations include the difficulty of tracking all VTEs (the use of an  
algorithm for the identification of inpatient and outpatient diagnoses of VTE in the health  
insurance database is, however, currently being validated); potential information bias on  
hormone therapy, since a proportion of these treatments are not reimbursed and therefore cannot  
be detected in the SNDS; a potential lack of statistical power; and inability to take account of  
some risk factors for VTEs (including obesity, and a family history of thromboembolic disease)  
in the case-control design – although we believe that these potential confounding factors should  
affect cases and controls to the same extent.

## FIGURE AND TABLE LEGENDS

**Figure 1:** Overall study design

**Figure 2:** Schneeweiss diagram for analysis #1 (44)

**Figure 3:** A directed acyclic graph of the relationship between JAKis, AD, and VTEs

**Table 1:** List of meta-analyses on the risk of VTEs during treatment with JAKis

**Table 2:** List of variables

**Table 3:** Power calculation for analysis #1

## STATEMENTS

### Contributorship statement

PB and CD wrote the first draft of the manuscript. PB, LMS, AL, DSS, GC, PG, AD, EO and CD conceived the scoping review and developed the research questions and the search strategy. All authors critically reviewed drafts and edited the manuscript.

### Competing interests

There are no competing interests for any author.

### Funding

There are no funders to report for this submission.

## ACKNOWLEDGMENTS

We would like to thank David Fraser for the English language revision and Stéphanie Mehrand, the Director of the French Eczema Association for her contribution to this work.



**REFERENCES**

1. Bieber T. Atopic dermatitis. *N Engl J Med*. 3 avr 2008;358(14):1483-94.
2. Silverberg JI, Hanifin JM. Adult eczema prevalence and associations with asthma and other health and demographic factors: a US population-based study. *J Allergy Clin Immunol*. nov 2013;132(5):1132-8.
3. Barbarot S, Auziere S, Gadkari A, Girolomoni G, Puig L, Simpson EL, et al. Epidemiology of atopic dermatitis in adults: Results from an international survey. *Allergy*. juin 2018;73(6):1284-93.
4. Williams H, Robertson C, Stewart A, Ait-Khaled N, Anabwani G, Anderson R, et al. Worldwide variations in the prevalence of symptoms of atopic eczema in the International Study of Asthma and Allergies in Childhood. *J Allergy Clin Immunol*. janv 1999;103(1 Pt 1):125-38.
5. Flohr C, Mann J. New insights into the epidemiology of childhood atopic dermatitis. *Allergy*. janv 2014;69(1):3-16.
6. Wollenberg A, Barbarot S, Bieber T, Christen-Zaech S, Deleuran M, Fink-Wagner A, et al. Consensus-based European guidelines for treatment of atopic eczema (atopic dermatitis) in adults and children: part I. *J Eur Acad Dermatol Venereol JEADV*. mai 2018;32(5):657-82.
7. Wollenberg A, Barbarot S, Bieber T, Christen-Zaech S, Deleuran M, Fink-Wagner A, et al. Consensus-based European guidelines for treatment of atopic eczema (atopic dermatitis) in adults and children: part II. *J Eur Acad Dermatol Venereol JEADV*. juin 2018;32(6):850-78.
8. Blauvelt A, de Bruin-Weller M, Gooderham M, Cather JC, Weisman J, Pariser D, et al. Long-term management of moderate-to-severe atopic dermatitis with dupilumab and concomitant topical corticosteroids (LIBERTY AD CHRONOS): a 1-year, randomised, double-blinded, placebo-controlled, phase 3 trial. *Lancet Lond Engl*. 10 juin 2017;389(10086):2287-303.
9. Simpson EL, Bieber T, Guttman-Yassky E, Beck LA, Blauvelt A, Cork MJ, et al. Two Phase 3 Trials of Dupilumab versus Placebo in Atopic Dermatitis. *N Engl J Med*. 15 déc 2016;375(24):2335-48.
10. Simpson EL, Lacour J-P, Spelman L, Galimberti R, Eichenfield LF, Bissonnette R, et al. Baricitinib in patients with moderate-to-severe atopic dermatitis and inadequate response to topical corticosteroids: results from two randomized monotherapy phase III trials. *Br J Dermatol*. août 2020;183(2):242-55.
11. Simpson EL, Forman S, Silverberg JI, Zirwas M, Maverakis E, Han G, et al. Baricitinib in patients with moderate-to-severe atopic dermatitis: Results from a randomized

- 1  
2  
3 monotherapy phase 3 trial in the United States and Canada (BREEZE-AD5). *J Am Acad Dermatol.* juill 2021;85(1):62-70.
- 4  
5  
6  
7 12. Reich K, Kabashima K, Peris K, Silverberg JI, Eichenfield LF, Bieber T, et al. Efficacy  
8 and Safety of Baricitinib Combined With Topical Corticosteroids for Treatment of  
9 Moderate to Severe Atopic Dermatitis: A Randomized Clinical Trial. *JAMA Dermatol.* 1  
10 déc 2020;156(12):1333-43.
- 11  
12 13. King B, Maari C, Lain E, Silverberg JI, Issa M, Holzwarth K, et al. Extended Safety  
13 Analysis of Baricitinib 2 mg in Adult Patients with Atopic Dermatitis: An Integrated  
14 Analysis from Eight Randomized Clinical Trials. *Am J Clin Dermatol.* mai  
15 2021;22(3):395-405.
- 16  
17 18. Guttman-Yassky E, Teixeira HD, Simpson EL, Papp KA, Pangan AL, Blauvelt A, et al.  
18 Once-daily upadacitinib versus placebo in adolescents and adults with moderate-to-  
19 severe atopic dermatitis (Measure Up 1 and Measure Up 2): results from two replicate  
20 double-blind, randomised controlled phase 3 trials. *Lancet Lond Engl.* 5 juin  
21 2021;397(10290):2151-68.
- 22  
23 24. Reich K, Teixeira HD, de Bruin-Weller M, Bieber T, Soong W, Kabashima K, et al.  
25 Safety and efficacy of upadacitinib in combination with topical corticosteroids in  
26 adolescents and adults with moderate-to-severe atopic dermatitis (AD Up): results from  
27 a randomised, double-blind, placebo-controlled, phase 3 trial. *Lancet Lond Engl.* 5 juin  
28 2021;397(10290):2169-81.
- 29  
30 31. AbbVie. A Phase 3b Multicenter, Randomized, Double-Blind, Double-Dummy, Active  
32 Controlled Study Comparing the Safety and Efficacy of Upadacitinib to Dupilumab in  
33 Adult Subjects With Moderate to Severe Atopic Dermatitis [Internet]. *clinicaltrials.gov*;  
34 2021 juill [cité 5 juill 2021]. Report No.: NCT03738397. Disponible sur:  
35 <https://clinicaltrials.gov/ct2/show/NCT03738397>
- 36  
37 38. Simpson EL, Sinclair R, Forman S, Wollenberg A, Aschoff R, Cork M, et al. Efficacy  
38 and safety of abrocitinib in adults and adolescents with moderate-to-severe atopic  
39 dermatitis (JADE MONO-1): a multicentre, double-blind, randomised, placebo-  
40 controlled, phase 3 trial. *Lancet Lond Engl.* 25 juill 2020;396(10246):255-66.
- 41  
42 43. Silverberg JI, Simpson EL, Thyssen JP, Gooderham M, Chan G, Feeney C, et al.  
44 Efficacy and Safety of Abrocitinib in Patients With Moderate-to-Severe Atopic  
45 Dermatitis: A Randomized Clinical Trial. *JAMA Dermatol.* 1 août 2020;156(8):863-73.
- 46  
47 48. Bieber T, Simpson EL, Silverberg JI, Thaçi D, Paul C, Pink AE, et al. Abrocitinib versus  
48 Placebo or Dupilumab for Atopic Dermatitis. *N Engl J Med.* 25 mars  
49 2021;384(12):1101-12.
- 50  
51 52. Wollenberg A, Blauvelt A, Guttman-Yassky E, Worm M, Lynde C, Lacour J-P, et al.  
53 Tralokinumab for moderate-to-severe atopic dermatitis: results from two 52-week,  
54 randomized, double-blind, multicentre, placebo-controlled phase III trials (ECZTRA 1  
55 and ECZTRA 2). *Br J Dermatol.* mars 2021;184(3):437-49.
- 56  
57 58. Silverberg JI, Toth D, Bieber T, Alexis AF, Elewski BE, Pink AE, et al. Tralokinumab  
58 plus topical corticosteroids for the treatment of moderate-to-severe atopic dermatitis:
- 59  
60

- 1  
2  
3 results from the double-blind, randomized, multicentre, placebo-controlled phase III  
4 ECZTRA 3 trial. *Br J Dermatol.* mars 2021;184(3):450-63.  
5
- 6  
7 22. Taylor PC, Weinblatt ME, Burmester GR, Rooney TP, Witt S, Walls CD, et al.  
8 Cardiovascular Safety During Treatment With Baricitinib in Rheumatoid Arthritis.  
9 *Arthritis Rheumatol Hoboken NJ.* juill 2019;71(7):1042-55.
- 10  
11 23. European Medicines Agency. olumiant EPAR risk management plan summary  
12 [Internet]. [cité 22 juill 2021]. Disponible sur:  
13 [https://www.ema.europa.eu/en/documents/rmp-summary/olumiant-epar-risk-](https://www.ema.europa.eu/en/documents/rmp-summary/olumiant-epar-risk-management-plan-summary_en.pdf)  
14 [management-plan-summary\\_en.pdf](https://www.ema.europa.eu/en/documents/rmp-summary/olumiant-epar-risk-management-plan-summary_en.pdf)  
15
- 16  
17 24. Food and Drug Administration. NDA 207924, Baricitinib, a JAK inhibitor for RA  
18 [Internet]. 2018 [cité 16 mai 2021]. Disponible sur:  
19 <https://www.fda.gov/media/112372/download>  
20
- 21  
22 25. Scott IC, Hider SL, Scott DL. Thromboembolism with Janus Kinase (JAK) Inhibitors for  
23 Rheumatoid Arthritis: How Real is the Risk? *Drug Saf.* juill 2018;41(7):645-53.
- 24  
25 26. Mogul A, Corsi K, McAuliffe L. Baricitinib: The Second FDA-Approved JAK Inhibitor  
26 for the Treatment of Rheumatoid Arthritis. *Ann Pharmacother.* sept 2019;53(9):947-53.
- 27  
28 27. Cohen SB, van Vollenhoven RF, Winthrop KL, Zerbini CAF, Tanaka Y, Bessette L, et  
29 al. Safety profile of upadacitinib in rheumatoid arthritis: integrated analysis from the  
30 SELECT phase III clinical programme. *Ann Rheum Dis.* 28 oct 2020;  
31
- 32  
33 28. Molander V, Bower H, Frisell T, Askling J. Risk of venous thromboembolism in  
34 rheumatoid arthritis, and its association with disease activity: a nationwide cohort study  
35 from Sweden. *Ann Rheum Dis.* févr 2021;80(2):169-75.
- 36  
37 29. Downing LJ, Strieter RM, Kadell AM, Wilke CA, Austin JC, Hare BD, et al. IL-10  
38 regulates thrombus-induced vein wall inflammation and thrombosis. *J Immunol Baltim*  
39 *Md* 1950. 1 août 1998;161(3):1471-6.
- 40  
41 30. Riley JK, Takeda K, Akira S, Schreiber RD. Interleukin-10 receptor signaling through  
42 the JAK-STAT pathway. Requirement for two distinct receptor-derived signals for anti-  
43 inflammatory action. *J Biol Chem.* 4 juin 1999;274(23):16513-21.  
44
- 45  
46 31. Xie W, Huang Y, Xiao S, Sun X, Fan Y, Zhang Z. Impact of Janus kinase inhibitors on  
47 risk of cardiovascular events in patients with rheumatoid arthritis: systematic review and  
48 meta-analysis of randomised controlled trials. *Ann Rheum Dis.* août  
49 2019;78(8):1048-54.
- 50  
51 32. Xie W, Xiao S, Huang Y, Sun X, Zhang Z. Effect of tofacitinib on cardiovascular events  
52 and all-cause mortality in patients with immune-mediated inflammatory diseases: a  
53 systematic review and meta-analysis of randomized controlled trials. *Ther Adv*  
54 *Musculoskelet Dis.* 2019;11:1759720X19895492.  
55
- 56  
57 33. Olivera PA, Lasa JS, Bonovas S, Danese S, Peyrin-Biroulet L. Safety of Janus Kinase  
58 Inhibitors in Patients With Inflammatory Bowel Diseases or Other Immune-mediated  
59 Diseases: A Systematic Review and Meta-Analysis. *Gastroenterology.* mai  
60 2020;158(6):1554-1573.e12.

- 1
- 2
- 3 34. Giménez Poderós T, Gallardo Borge S, Vazquez-Ferreiro P. Risk of Venous
- 4 Thromboembolism Associated With Tofacitinib and Baricitinib: A Systematic Review
- 5 and Indirect Meta-Analysis. *Pharmacotherapy*. déc 2020;40(12):1248-64.
- 6
- 7
- 8 35. Yates M, Mootoo A, Adas M, Bechman K, Rampes S, Patel V, et al. Venous
- 9 thromboembolism risk with JAK inhibitors: A Meta-analysis. *Arthritis Rheumatol*
- 10 *Hoboken NJ*. 10 nov 2020;
- 11
- 12 36. Wang F, Sun L, Wang S, Davis JM, Matteson EL, Murad MH, et al. Efficacy and Safety
- 13 of Tofacitinib, Baricitinib, and Upadacitinib for Rheumatoid Arthritis: A Systematic
- 14 Review and Meta-Analysis. *Mayo Clin Proc*. juill 2020;95(7):1404-19.
- 15
- 16 37. Bilal J, Riaz IB, Naqvi SAA, Bhattacharjee S, Obert MR, Sadiq M, et al. Janus Kinase
- 17 Inhibitors and Risk of Venous Thromboembolism: A Systematic Review and Meta-
- 18 analysis. *Mayo Clin Proc*. juill 2021;96(7):1861-73.
- 19
- 20
- 21 38. Desai RJ, Pawar A, Weinblatt ME, Kim SC. Comparative Risk of Venous
- 22 Thromboembolism in Rheumatoid Arthritis Patients Receiving Tofacitinib Versus Those
- 23 Receiving Tumor Necrosis Factor Inhibitors: An Observational Cohort Study. *Arthritis*
- 24 *Rheumatol Hoboken NJ*. juin 2019;71(6):892-900.
- 25
- 26 39. Desai RJ, Pawar A, Khosrow-Khavar F, Weinblatt ME, Kim SC. Risk of venous
- 27 thromboembolism associated with tofacitinib in patients with rheumatoid arthritis: a
- 28 population-based cohort study. *Rheumatol Oxf Engl*. 22 mars 2021;keab294.
- 29
- 30
- 31 40. Meyers KJ, Silverberg JI, Rueda MJ, Goodloe R, Pierce EJ, Deberdt W, et al. Risk of
- 32 Venous Thromboembolism Among Patients with Atopic Dermatitis: A Cohort Study in a
- 33 US Administrative Claims Database. *Dermatol Ther*. juin 2021;11(3):1041-52.
- 34
- 35 41. Setyawan J, Azimi N, Strand V, Yarur A, Fridman M. Reporting of Thromboembolic
- 36 Events with JAK Inhibitors: Analysis of the FAERS Database 2010–2019. *Drug Saf*.
- 37 2021;44(8):889-97.
- 38
- 39
- 40 42. Di Nisio M, van Es N, Büller HR. Deep vein thrombosis and pulmonary embolism.
- 41 *Lancet Lond Engl*. 17 déc 2016;388(10063):3060-73.
- 42
- 43 43. Rothman KJ, Greenland S, Lash TL. *Modern epidemiology*. 2008.
- 44
- 45 44. Schneeweiss S, Rassen JA, Brown JS, Rothman KJ, Happe L, Arlett P, et al. Graphical
- 46 Depiction of Longitudinal Study Designs in Health Care Databases. *Ann Intern Med*. 19
- 47 mars 2019;170(6):398-406.
- 48
- 49 45. Consiglio GP, Burden AM, Maclure M, McCarthy L, Cadarette SM. Case-crossover
- 50 study design in pharmacoepidemiology: systematic review and recommendations.
- 51 *Pharmacoepidemiol Drug Saf*. nov 2013;22(11):1146-53.
- 52
- 53
- 54 46. Comité scientifique permanent Surveillance et pharmacovigilance du 24/09/2019 -
- 55 Formation restreinte Expertise - Compte-rendu (07/02/2020) [Internet]. [cité 20 mai
- 56 2021]. Disponible sur: [https://archiveansm.integra.fr/Mediatheque/Publications/Ordres-](https://archiveansm.integra.fr/Mediatheque/Publications/Ordres-du-jour-comptes-rendus-des-commissions-comites-groupe-de-travail-Comites-scientifiques-permanents)
- 57 [du-jour-comptes-rendus-des-commissions-comites-](https://archiveansm.integra.fr/Mediatheque/Publications/Ordres-du-jour-comptes-rendus-des-commissions-comites-groupe-de-travail-Comites-scientifiques-permanents)
- 58 [groupe-de-travail-Comites-](https://archiveansm.integra.fr/Mediatheque/Publications/Ordres-du-jour-comptes-rendus-des-commissions-comites-groupe-de-travail-Comites-scientifiques-permanents)
- 59 [scientifiques-permanents](https://archiveansm.integra.fr/Mediatheque/Publications/Ordres-du-jour-comptes-rendus-des-commissions-comites-groupe-de-travail-Comites-scientifiques-permanents)
- 60

- 1
- 2
- 3
- 4 47. Bannay A, Chaignot C, Blotière P-O, Basson M, Weill A, Ricordeau P, et al. The Best
- 5 Use of the Charlson Comorbidity Index With Electronic Health Care Database to Predict
- 6 Mortality. *Med Care*. févr 2016;54(2):188-94.
- 7
- 8 48. Charlson M, Szatrowski TP, Peterson J, Gold J. Validation of a combined comorbidity
- 9 index. *J Clin Epidemiol*. nov 1994;47(11):1245-51.
- 10
- 11 49. Kunutsor SK, Seidu S, Khunti K. Statins and primary prevention of venous
- 12 thromboembolism: a systematic review and meta-analysis. *Lancet Haematol*. févr
- 13 2017;4(2):e83-93.
- 14
- 15 50. Johannesdottir SA, Horváth-Puhó E, Dekkers OM, Cannegieter SC, Jørgensen JOL,
- 16 Ehrenstein V, et al. Use of glucocorticoids and risk of venous thromboembolism: a
- 17 nationwide population-based case-control study. *JAMA Intern Med*. 13 mai
- 18 2013;173(9):743-52.
- 19
- 20 51. Zhang A, Silverberg JI. Association of atopic dermatitis with being overweight and
- 21 obese: a systematic review and metaanalysis. *J Am Acad Dermatol*. avr 2015;72(4):606-
- 22 616.e4.
- 23
- 24 52. Haute Autorité de Santé. Olumiant et dermatite atopique, avis de la commission de
- 25 transparence [Internet]. 2021 [cité 23 juill 2021]. Disponible sur: [https://www.has-](https://www.has-sante.fr/upload/docs/evamed/CT-18912_OLUMIANT_PIC_EI_DA_AvisDef_CT18912.pdf)
- 26 [sante.fr/upload/docs/evamed/CT-](https://www.has-sante.fr/upload/docs/evamed/CT-18912_OLUMIANT_PIC_EI_DA_AvisDef_CT18912.pdf)
- 27 [18912\\_OLUMIANT\\_PIC\\_EI\\_DA\\_AvisDef\\_CT18912.pdf](https://www.has-sante.fr/upload/docs/evamed/CT-18912_OLUMIANT_PIC_EI_DA_AvisDef_CT18912.pdf)
- 28
- 29 53. European Medicines Agency. Rinvoq-résumé des caractéristiques du produit [Internet].
- 30 European Medicines Agency. 2019 [cité 20 mai 2021]. Disponible sur:
- 31 <https://www.ema.europa.eu/en/medicines/human/EPAR/rinvoq>
- 32
- 33 54. Trifan G, Shafi N, Testai FD. Implications of Janus Kinase 2 Mutation in Embolic
- 34 Stroke of Unknown Source. *J Stroke Cerebrovasc Dis Off J Natl Stroke Assoc*. oct
- 35 2018;27(10):2572-8.
- 36
- 37 55. Hobbs CM, Manning H, Bennett C, Vasquez L, Severin S, Brain L, et al. JAK2V617F
- 38 leads to intrinsic changes in platelet formation and reactivity in a knock-in mouse model
- 39 of essential thrombocythemia. *Blood*. 28 nov 2013;122(23):3787-97.
- 40
- 41 56. Matta F, Singala R, Yaekoub AY, Najjar R, Stein PD. Risk of venous thromboembolism
- 42 with rheumatoid arthritis. *Thromb Haemost*. janv 2009;101(1):134-8.
- 43
- 44 57. Zöller B, Li X, Sundquist J, Sundquist K. Autoimmune diseases and venous
- 45 thromboembolism: a review of the literature. *Am J Cardiovasc Dis*. 2012;2(3):171-83.
- 46
- 47 58. Galloway J, Barrett K, Irving P, Khavandi K, Nijher M, Nicholson R, et al. Risk of
- 48 venous thromboembolism in immune-mediated inflammatory diseases: a UK matched
- 49 cohort study. *RMD Open*. sept 2020;6(3).
- 50
- 51 59. Schmidt C. Traitement ambulatoire des thromboses veineuses profondes des membres
- 52 inférieurs à la phase aiguë Outpatient treatment of deep vein thrombosis. 2002;6.
- 53
- 54 60. Maclure M. The case-crossover design: a method for studying transient effects on the
- 55 risk of acute events. *Am J Epidemiol*. 15 janv 1991;133(2):144-53.
- 56
- 57
- 58
- 59
- 60

- 1  
2  
3 61. Maclure M, Fireman B, Nelson JC, Hua W, Shoaibi A, Paredes A, et al. When should  
4 case-only designs be used for safety monitoring of medical products?  
5 *Pharmacoepidemiol Drug Saf.* janv 2012;21 Suppl 1:50-61.  
6
- 7 62. Bykov K, Mittleman MA, Glynn RJ, Schneeweiss S, Gagne JJ. The Case-Crossover  
8 Design for Drug-Drug Interactions: Considerations for Implementation. *Epidemiol*  
9 *Camb Mass.* mars 2019;30(2):204-11.  
10
- 11 63. Kremer J, Huizinga TWJ, Chen L, Saifan CG, Issa M, Witt SL, et al. FRI0090 Analysis  
12 of neutrophils, lymphocytes, and platelets in pooled phase 2 and phase 3 studies of  
13 baricitinib for rheumatoid arthritis. *Ann Rheum Dis.* 1 juin 2017;76(Suppl 2):512-512.  
14
- 15 64. Olumiant [Internet]. European Medicines Agency. 2018 [cité 20 mai 2021]. Disponible  
16 sur: <https://www.ema.europa.eu/en/medicines/human/EPAR/olumiant>  
17
- 18 65. Norris LA, Bonnar J. Haemostatic changes and the oral contraceptive pill. *Baillieres Clin*  
19 *Obstet Gynaecol.* sept 1997;11(3):545-64.  
20
- 21 66. Norris LA, Bonnar J. Effect of oestrogen dose on whole blood platelet activation in  
22 women taking new low dose oral contraceptives. *Thromb Haemost.* déc  
23 1994;72(6):926-30.  
24
- 25 67. Quehenberger P, Loner U, Kapiotis S, Handler S, Schneider B, Huber J, et al. Increased  
26 levels of activated factor VII and decreased plasma protein S activity and circulating  
27 thrombomodulin during use of oral contraceptives. *Thromb Haemost.* nov  
28 1996;76(5):729-34.  
29
- 30 68. Kelleher CC. Clinical aspects of the relationship between oral contraceptives and  
31 abnormalities of the hemostatic system: relation to the development of cardiovascular  
32 disease. *Am J Obstet Gynecol.* juill 1990;163(1 Pt 2):392-5.  
33
- 34 69. Contraceptifs hormonaux combinés (pilules, anneau vaginal et patch) : Position finale du  
35 Comité des médicaments à usage humain (CHMP) - Point d'information - ANSM :  
36 Agence nationale de sécurité du médicament et des produits de santé [Internet]. [cité 22  
37 sept 2021]. Disponible sur: <https://archiveansm.integra.fr/S-informer/Travaux-de-l-Agence-Europeenne-des-Medicaments-EMA-Comite-des-medicaments-a-usage-humain-CHMP/Contraceptifs-hormonaux-combines-pilules-anneau-vaginal-et-patch-Position-finale-du-Comite-des-medicaments-a-usage-humain-CHMP-Point-d-information>  
38
- 39 70. Heit JA, Spencer FA, White RH. The epidemiology of venous thromboembolism. *J*  
40 *Thromb Thrombolysis.* janv 2016;41(1):3-14.  
41
- 42 71. Falanga A, Russo L, Milesi V, Vignoli A. Mechanisms and risk factors of thrombosis in  
43 cancer. *Crit Rev Oncol Hematol.* oct 2017;118:79-83.  
44
- 45 72. Sweetland S, Parkin L, Balkwill A, Green J, Reeves G, Beral V, et al. Smoking, surgery,  
46 and venous thromboembolism risk in women: United Kingdom cohort study. *Circulation.* 26 mars 2013;127(12):1276-82.  
47  
48  
49  
50  
51  
52  
53  
54  
55  
56  
57  
58  
59  
60

- 1
- 2
- 3 73. Bjøri E, Johnsen HS, Hansen J-B, Brækkan SK. Hospitalization as a trigger for venous
- 4 thromboembolism - Results from a population-based case-crossover study. *Thromb Res.*
- 5 *avr 2019;176:115-9.*
- 6
- 7
- 8 74. Rott H. Prevention and treatment of venous thromboembolism during HRT: current
- 9 perspectives. *Int J Gen Med.* 2014;7:433-40.
- 10
- 11 75. Aksu K, Donmez A, Keser G. Inflammation-induced thrombosis: mechanisms, disease
- 12 associations and management. *Curr Pharm Des.* 2012;18(11):1478-93.
- 13
- 14 76. van den Oever I a. M, Sattar N, Nurmohamed MT. Thromboembolic and cardiovascular
- 15 risk in rheumatoid arthritis: role of the haemostatic system. *Ann Rheum Dis.* juin
- 16 2014;73(6):954-7.
- 17
- 18 77. Gaertner S, Cordeanu E-M, Mirea C, Frantz A-S, Auger C, Bilbault P, et al. Increased
- 19 risk and severity of unprovoked venous thromboembolism with clustering cardiovascular
- 20 risk factors for atherosclerosis: Results of the REMOTEV registry. *Int J Cardiol.* 1 févr
- 21 2018;252:169-74.
- 22
- 23
- 24 78. Ageno W, Becattini C, Brighton T, Selby R, Kamphuisen PW. Cardiovascular risk
- 25 factors and venous thromboembolism: a meta-analysis. *Circulation.* 1 janv
- 26 2008;117(1):93-102.
- 27
- 28
- 29 79. Zakai NA, McClure LA, Judd SE, Safford MM, Folsom AR, Lutsey PL, et al. Racial and
- 30 regional differences in venous thromboembolism in the United States in 3 cohorts.
- 31 *Circulation.* 8 avr 2014;129(14):1502-9.
- 32
- 33 80. Hallas J, Pottegård A. Use of self-controlled designs in pharmacoepidemiology. *J Intern*
- 34 *Med.* juin 2014;275(6):581-9.
- 35
- 36
- 37
- 38
- 39
- 40
- 41
- 42
- 43
- 44
- 45
- 46
- 47
- 48
- 49
- 50
- 51
- 52
- 53
- 54
- 55
- 56
- 57
- 58
- 59
- 60

- Nested case-control study (analysis #1)
- Nested case-time-control study (analysis #2): in patients with a VTE, we shall compare the frequency of JAKi initiation in the risk period (before VTE) with the frequency of JAKi initiation in the reference period (prior to the risk period).





**Figure 2: Schneeweiss diagram for analysis #1**



Abbreviations: AD, atopic dermatitis; ED, event date; VTE, venous thromboembolic event

\*Censored at the date of the first VTE, death, emigration, or the end of the study period

\*\* ED: the date of the first VTE (the index date)

1  
2  
3  
4  
5  
6  
7  
8  
9  
10  
11  
12  
13  
14  
15  
16  
17  
18  
19  
20  
21  
22  
23  
24  
25  
26  
27  
28  
29  
30  
31  
32  
33  
34  
35  
36  
37  
38  
39  
40  
41  
42  
43  
44  
45  
46

For peer review only

1  
2  
3  
4  
5  
6  
7  
8  
9  
10  
11  
12  
13  
14  
15  
16  
17  
18  
19  
20  
21  
22  
23  
24  
25  
26  
27  
28  
29  
30



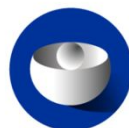

EUROPEAN MEDICINES AGENCY  
SCIENCE MEDICINES HEALTH



European Network of Centres for  
Pharmacoepidemiology and  
Pharmacovigilance

Doc.Ref. EMA/540136/2009

## ENCePP Checklist for Study Protocols (Revision 4)

Adopted by the ENCePP Steering Group on 15/10/2018

The [European Network of Centres for Pharmacoepidemiology and Pharmacovigilance \(ENCePP\)](#) welcomes innovative designs and new methods of research. This Checklist has been developed by ENCePP to stimulate consideration of important principles when designing and writing a pharmacoepidemiological or pharmacovigilance study protocol. The Checklist is intended to promote the quality of such studies, not their uniformity. The user is also referred to the [ENCePP Guide on Methodological Standards in Pharmacoepidemiology](#), which reviews and gives direct electronic access to guidance for research in pharmacoepidemiology and pharmacovigilance.

For each question of the Checklist, the investigator should indicate whether or not it has been addressed in the study protocol. If the answer is "Yes", the section number of the protocol where this issue has been discussed should be specified. It is possible that some questions do not apply to a particular study (for example, in the case of an innovative study design). In this case, the answer 'N/A' (Not Applicable) can be checked and the "Comments" field included for each section should be used to explain why. The "Comments" field can also be used to elaborate on a "No" answer.

This Checklist should be included as an Annex by marketing authorisation holders when submitting the protocol of a non-interventional post-authorisation safety study (PASS) to a regulatory authority (see the [Guidance on the format and content of the protocol of non-interventional post-authorisation safety studies](#)). The Checklist is a supporting document and does not replace the format of the protocol for PASS presented in the Guidance and Module VIII of the Good pharmacovigilance practices (GVP).

**Study title:** Oral Janus kinases inhibitors and venous thromboembolism in atopic dermatitis: Protocol of a case-time control study and a nested case-control study based on French SNDS cohort

**EU PAS Register® number:**  
**Study reference number (if applicable):**

| <b>Section 1: Milestones</b>                | <b>Yes</b>                          | <b>No</b>                | <b>N/A</b>                          | <b>Section Number</b> |
|---------------------------------------------|-------------------------------------|--------------------------|-------------------------------------|-----------------------|
| 1.1 Does the protocol specify timelines for |                                     |                          |                                     |                       |
| 1.1.1 Start of data collection <sup>1</sup> | <input checked="" type="checkbox"/> | <input type="checkbox"/> | <input type="checkbox"/>            | p. 10                 |
| 1.1.2 End of data collection <sup>2</sup>   | <input checked="" type="checkbox"/> | <input type="checkbox"/> | <input type="checkbox"/>            | p. 10                 |
| 1.1.3 Progress report(s)                    | <input type="checkbox"/>            | <input type="checkbox"/> | <input checked="" type="checkbox"/> |                       |
| 1.1.4 Interim report(s)                     | <input type="checkbox"/>            | <input type="checkbox"/> | <input checked="" type="checkbox"/> |                       |

<sup>1</sup> Date from which information on the first study is first recorded in the study dataset or, in the case of secondary use of data, the date from which data extraction starts.

<sup>2</sup> Date from which the analytical dataset is completely available.

1  
2  
3  
4  
5  
6  
7  
8  
9  
10  
11  
12  
13  
14  
15  
16  
17  
18  
19  
20  
21  
22  
23  
24  
25  
26  
27  
28  
29  
30  
31  
32  
33  
34  
35  
36  
37  
38  
39  
40  
41  
42  
43  
44  
45  
46  
47  
48  
49  
50  
51  
52  
53  
54  
55  
56  
57  
58  
59  
60

| <b><u>Section 1: Milestones</u></b>        | <b>Yes</b>                          | <b>No</b>                           | <b>N/A</b>               | <b>Section Number</b> |
|--------------------------------------------|-------------------------------------|-------------------------------------|--------------------------|-----------------------|
| 1.1.5 Registration in the EU PAS Register® | <input type="checkbox"/>            | <input checked="" type="checkbox"/> | <input type="checkbox"/> | p.17                  |
| 1.1.6 Final report of study results.       | <input checked="" type="checkbox"/> | <input type="checkbox"/>            | <input type="checkbox"/> |                       |

Comments:

|  |
|--|
|  |
|--|

| <b><u>Section 2: Research question</u></b>                                                                                                                      | <b>Yes</b>                          | <b>No</b>                | <b>N/A</b>                          | <b>Section Number</b> |
|-----------------------------------------------------------------------------------------------------------------------------------------------------------------|-------------------------------------|--------------------------|-------------------------------------|-----------------------|
| 2.1 Does the formulation of the research question and objectives clearly explain:                                                                               | <input checked="" type="checkbox"/> | <input type="checkbox"/> | <input type="checkbox"/>            | p. 6-8                |
| 2.1.1 Why the study is conducted? (e.g. to address an important public health concern, a risk identified in the risk management plan, an emerging safety issue) | <input checked="" type="checkbox"/> | <input type="checkbox"/> | <input type="checkbox"/>            | p. 6-8                |
| 2.1.2 The objective(s) of the study?                                                                                                                            | <input checked="" type="checkbox"/> | <input type="checkbox"/> | <input type="checkbox"/>            | p. 9-10               |
| 2.1.3 The target population? (i.e. population or subgroup to whom the study results are intended to be generalised)                                             | <input checked="" type="checkbox"/> | <input type="checkbox"/> | <input type="checkbox"/>            | p. 9                  |
| 2.1.4 Which hypothesis(-es) is (are) to be tested?                                                                                                              | <input checked="" type="checkbox"/> | <input type="checkbox"/> | <input type="checkbox"/>            | p. 9                  |
| 2.1.5 If applicable, that there is no <i>a priori</i> hypothesis?                                                                                               | <input type="checkbox"/>            | <input type="checkbox"/> | <input checked="" type="checkbox"/> |                       |

Comments:

|  |
|--|
|  |
|--|

| <b><u>Section 3: Study design</u></b>                                                                                                                                                                 | <b>Yes</b>                          | <b>No</b>                | <b>N/A</b>                          | <b>Section Number</b> |
|-------------------------------------------------------------------------------------------------------------------------------------------------------------------------------------------------------|-------------------------------------|--------------------------|-------------------------------------|-----------------------|
| 3.1 Is the study design described? (e.g. cohort, case-control, cross-sectional, other design)                                                                                                         | <input checked="" type="checkbox"/> | <input type="checkbox"/> | <input type="checkbox"/>            | p. 9-14               |
| 3.2 Does the protocol specify whether the study is based on primary, secondary or combined data collection?                                                                                           | <input checked="" type="checkbox"/> | <input type="checkbox"/> | <input type="checkbox"/>            | p. 10-11              |
| 3.3 Does the protocol specify measures of occurrence? (e.g., rate, risk, prevalence)                                                                                                                  | <input checked="" type="checkbox"/> | <input type="checkbox"/> | <input type="checkbox"/>            | p. 12-13              |
| 3.4 Does the protocol specify measure(s) of association? (e.g. risk, odds ratio, excess risk, rate ratio, hazard ratio, risk/rate difference, number needed to harm (NNH))                            | <input checked="" type="checkbox"/> | <input type="checkbox"/> | <input type="checkbox"/>            | p. 12-13              |
| 3.5 Does the protocol describe the approach for the collection and reporting of adverse events/adverse reactions? (e.g. adverse events that will not be collected in case of primary data collection) | <input type="checkbox"/>            | <input type="checkbox"/> | <input checked="" type="checkbox"/> |                       |

Comments:

|  |
|--|
|  |
|--|

| <b><u>Section 4: Source and study populations</u></b>    | <b>Yes</b>                          | <b>No</b>                | <b>N/A</b>               | <b>Section Number</b> |
|----------------------------------------------------------|-------------------------------------|--------------------------|--------------------------|-----------------------|
| 4.1 Is the source population described?                  | <input checked="" type="checkbox"/> | <input type="checkbox"/> | <input type="checkbox"/> | p. 10-11              |
| 4.2 Is the planned study population defined in terms of: |                                     |                          |                          |                       |
| 4.2.1 Study time period                                  | <input checked="" type="checkbox"/> | <input type="checkbox"/> | <input type="checkbox"/> | p. 10                 |

| <b>Section 4: Source and study populations</b>                                                                                                 | <b>Yes</b>                          | <b>No</b>                | <b>N/A</b>               | <b>Section Number</b> |
|------------------------------------------------------------------------------------------------------------------------------------------------|-------------------------------------|--------------------------|--------------------------|-----------------------|
| 4.2.2 Age and sex                                                                                                                              | <input checked="" type="checkbox"/> | <input type="checkbox"/> | <input type="checkbox"/> | p. 10                 |
| 4.2.3 Country of origin                                                                                                                        | <input checked="" type="checkbox"/> | <input type="checkbox"/> | <input type="checkbox"/> | p. 10                 |
| 4.2.4 Disease/indication                                                                                                                       | <input checked="" type="checkbox"/> | <input type="checkbox"/> | <input type="checkbox"/> | p. 10                 |
| 4.2.5 Duration of follow-up                                                                                                                    | <input checked="" type="checkbox"/> | <input type="checkbox"/> | <input type="checkbox"/> | p. 10-11              |
| 4.3 Does the protocol define how the study population will be sampled from the source population? (e.g. event or inclusion/exclusion criteria) | <input checked="" type="checkbox"/> | <input type="checkbox"/> | <input type="checkbox"/> | p. 10-11              |

Comments:

|  |
|--|
|  |
|--|

| <b>Section 5: Exposure definition and measurement</b>                                                                                                                                               | <b>Yes</b>                          | <b>No</b>                           | <b>N/A</b>               | <b>Section Number</b> |
|-----------------------------------------------------------------------------------------------------------------------------------------------------------------------------------------------------|-------------------------------------|-------------------------------------|--------------------------|-----------------------|
| 5.1 Does the protocol describe how the study exposure is defined and measured? (e.g. operational details for defining and categorising exposure, measurement of dose and duration of drug exposure) | <input checked="" type="checkbox"/> | <input type="checkbox"/>            | <input type="checkbox"/> | p. 10-11              |
| 5.2 Does the protocol address the validity of the exposure measurement? (e.g. precision, accuracy, use of validation sub-study)                                                                     | <input checked="" type="checkbox"/> | <input type="checkbox"/>            | <input type="checkbox"/> | p. 10-11              |
| 5.3 Is exposure categorised according to time windows?                                                                                                                                              | <input checked="" type="checkbox"/> | <input type="checkbox"/>            | <input type="checkbox"/> | p. 10-11              |
| 5.4 Is intensity of exposure addressed? (e.g. dose, duration)                                                                                                                                       | <input checked="" type="checkbox"/> | <input type="checkbox"/>            | <input type="checkbox"/> | p. 10-11              |
| 5.5 Is exposure categorised based on biological mechanism of action and taking into account the pharmacokinetics and pharmacodynamics of the drug?                                                  | <input type="checkbox"/>            | <input checked="" type="checkbox"/> | <input type="checkbox"/> |                       |
| 5.6 Is (are) (an) appropriate comparator(s) identified?                                                                                                                                             | <input checked="" type="checkbox"/> | <input type="checkbox"/>            | <input type="checkbox"/> | p. 10-11              |

Comments:

|  |
|--|
|  |
|--|

| <b>Section 6: Outcome definition and measurement</b>                                                                                                                                                                     | <b>Yes</b>                          | <b>No</b>                | <b>N/A</b>                          | <b>Section Number</b> |
|--------------------------------------------------------------------------------------------------------------------------------------------------------------------------------------------------------------------------|-------------------------------------|--------------------------|-------------------------------------|-----------------------|
| 6.1 Does the protocol specify the primary and secondary (if applicable) outcome(s) to be investigated?                                                                                                                   | <input checked="" type="checkbox"/> | <input type="checkbox"/> | <input type="checkbox"/>            | p. 11                 |
| 6.2 Does the protocol describe how the outcomes are defined and measured?                                                                                                                                                | <input checked="" type="checkbox"/> | <input type="checkbox"/> | <input type="checkbox"/>            | p. 11-12              |
| 6.3 Does the protocol address the validity of outcome measurement? (e.g. precision, accuracy, sensitivity, specificity, positive predictive value, use of validation sub-study)                                          | <input checked="" type="checkbox"/> | <input type="checkbox"/> | <input type="checkbox"/>            | p. 11                 |
| 6.4 Does the protocol describe specific outcomes relevant for Health Technology Assessment? (e.g. HRQoL, QALYs, DALYs, health care services utilisation, burden of disease or treatment, compliance, disease management) | <input type="checkbox"/>            | <input type="checkbox"/> | <input checked="" type="checkbox"/> |                       |

1  
2  
3  
4  
5  
6  
7  
8  
9  
10  
11  
12  
13  
14  
15  
16  
17  
18  
19  
20  
21  
22  
23  
24  
25  
26  
27  
28  
29  
30  
31  
32  
33  
34  
35  
36  
37  
38  
39  
40  
41  
42  
43  
44  
45  
46  
47  
48  
49  
50  
51  
52  
53  
54  
55  
56  
57  
58  
59  
60

Comments:

|  |
|--|
|  |
|--|

| <b>Section 7: Bias</b>                                                                                               | <b>Yes</b>                          | <b>No</b>                | <b>N/A</b>               | <b>Section Number</b> |
|----------------------------------------------------------------------------------------------------------------------|-------------------------------------|--------------------------|--------------------------|-----------------------|
| 7.1 Does the protocol address ways to measure confounding? (e.g. confounding by indication)                          | <input checked="" type="checkbox"/> | <input type="checkbox"/> | <input type="checkbox"/> | p. 14                 |
| 7.2 Does the protocol address selection bias? (e.g. healthy user/adherer bias)                                       | <input checked="" type="checkbox"/> | <input type="checkbox"/> | <input type="checkbox"/> | p.18                  |
| 7.3 Does the protocol address information bias? (e.g. misclassification of exposure and outcomes, time-related bias) | <input checked="" type="checkbox"/> | <input type="checkbox"/> | <input type="checkbox"/> | p.18                  |

Comments:

|  |
|--|
|  |
|--|

| <b>Section 8: Effect measure modification</b>                                                                                                            | <b>Yes</b>                          | <b>No</b>                | <b>N/A</b>               | <b>Section Number</b> |
|----------------------------------------------------------------------------------------------------------------------------------------------------------|-------------------------------------|--------------------------|--------------------------|-----------------------|
| 8.1 Does the protocol address effect modifiers? (e.g. collection of data on known effect modifiers, sub-group analyses, anticipated direction of effect) | <input checked="" type="checkbox"/> | <input type="checkbox"/> | <input type="checkbox"/> | p. 14                 |

Comments:

|  |
|--|
|  |
|--|

| <b>Section 9: Data sources</b>                                                                                                                                           | <b>Yes</b>                          | <b>No</b>                | <b>N/A</b>               | <b>Section Number</b> |
|--------------------------------------------------------------------------------------------------------------------------------------------------------------------------|-------------------------------------|--------------------------|--------------------------|-----------------------|
| 9.1 Does the protocol describe the data source(s) used in the study for the ascertainment of:                                                                            |                                     |                          |                          |                       |
| 9.1.1 Exposure? (e.g. pharmacy dispensing, general practice prescribing, claims data, self-report, face-to-face interview)                                               | <input checked="" type="checkbox"/> | <input type="checkbox"/> | <input type="checkbox"/> | p. 10-11              |
| 9.1.2 Outcomes? (e.g. clinical records, laboratory markers or values, claims data, self-report, patient interview including scales and questionnaires, vital statistics) | <input checked="" type="checkbox"/> | <input type="checkbox"/> | <input type="checkbox"/> | p. 11-12              |
| 9.1.3 Covariates and other characteristics?                                                                                                                              | <input checked="" type="checkbox"/> | <input type="checkbox"/> | <input type="checkbox"/> | p. 14                 |
| 9.2 Does the protocol describe the information available from the data source(s) on:                                                                                     |                                     |                          |                          |                       |
| 9.2.1 Exposure? (e.g. date of dispensing, drug quantity, dose, number of days of supply prescription, daily dosage, prescriber)                                          | <input checked="" type="checkbox"/> | <input type="checkbox"/> | <input type="checkbox"/> | p. 10-11              |
| 9.2.2 Outcomes? (e.g. date of occurrence, multiple event, severity measures related to event)                                                                            | <input checked="" type="checkbox"/> | <input type="checkbox"/> | <input type="checkbox"/> | p. 11-12              |
| 9.2.3 Covariates and other characteristics? (e.g. age, sex, clinical and drug use history, co-morbidity, co-medications, lifestyle)                                      | <input checked="" type="checkbox"/> | <input type="checkbox"/> | <input type="checkbox"/> | p. 14                 |
| 9.3 Is a coding system described for:                                                                                                                                    |                                     |                          |                          |                       |
| 9.3.1 Exposure? (e.g. WHO Drug Dictionary, Anatomical Therapeutic Chemical (ATC) Classification System)                                                                  | <input checked="" type="checkbox"/> | <input type="checkbox"/> | <input type="checkbox"/> | Table 2               |
| 9.3.2 Outcomes? (e.g. International Classification of Diseases (ICD), Medical Dictionary for Regulatory Activities (MedDRA))                                             | <input checked="" type="checkbox"/> | <input type="checkbox"/> | <input type="checkbox"/> | Table 2               |
| 9.3.3 Covariates and other characteristics?                                                                                                                              | <input checked="" type="checkbox"/> | <input type="checkbox"/> | <input type="checkbox"/> | Table 2               |

| <b>Section 9: Data sources</b>                                                                       | <b>Yes</b>               | <b>No</b>                | <b>N/A</b>                          | <b>Section Number</b> |
|------------------------------------------------------------------------------------------------------|--------------------------|--------------------------|-------------------------------------|-----------------------|
| 9.4 Is a linkage method between data sources described? (e.g. based on a unique identifier or other) | <input type="checkbox"/> | <input type="checkbox"/> | <input checked="" type="checkbox"/> |                       |

Comments:

| <b>Section 10: Analysis plan</b>                                                       | <b>Yes</b>                          | <b>No</b>                           | <b>N/A</b>                          | <b>Section Number</b> |
|----------------------------------------------------------------------------------------|-------------------------------------|-------------------------------------|-------------------------------------|-----------------------|
| 10.1 Are the statistical methods and the reason for their choice described?            | <input checked="" type="checkbox"/> | <input type="checkbox"/>            | <input type="checkbox"/>            | p. 9, 12, 13, 14      |
| 10.2 Is study size and/or statistical precision estimated?                             | <input checked="" type="checkbox"/> | <input type="checkbox"/>            | <input type="checkbox"/>            | p. 16                 |
| 10.3 Are descriptive analyses included?                                                | <input checked="" type="checkbox"/> | <input type="checkbox"/>            | <input type="checkbox"/>            | p.12-13               |
| 10.4 Are stratified analyses included?                                                 | <input type="checkbox"/>            | <input checked="" type="checkbox"/> | <input type="checkbox"/>            |                       |
| 10.5 Does the plan describe methods for analytic control of confounding?               | <input checked="" type="checkbox"/> | <input type="checkbox"/>            | <input type="checkbox"/>            | p. 18, 19             |
| 10.6 Does the plan describe methods for analytic control of outcome misclassification? | <input checked="" type="checkbox"/> | <input type="checkbox"/>            | <input type="checkbox"/>            | p. 19                 |
| 10.7 Does the plan describe methods for handling missing data?                         | <input type="checkbox"/>            | <input type="checkbox"/>            | <input checked="" type="checkbox"/> |                       |
| 10.8 Are relevant sensitivity analyses described?                                      | <input checked="" type="checkbox"/> | <input type="checkbox"/>            | <input type="checkbox"/>            | p. 14                 |

Comments:

| <b>Section 11: Data management and quality control</b>                                                                                                    | <b>Yes</b>                          | <b>No</b>                | <b>N/A</b>                          | <b>Section Number</b> |
|-----------------------------------------------------------------------------------------------------------------------------------------------------------|-------------------------------------|--------------------------|-------------------------------------|-----------------------|
| 11.1 Does the protocol provide information on data storage? (e.g. software and IT environment, database maintenance and anti-fraud protection, archiving) | <input checked="" type="checkbox"/> | <input type="checkbox"/> | <input type="checkbox"/>            | p. 17                 |
| 11.2 Are methods of quality assurance described?                                                                                                          | <input type="checkbox"/>            | <input type="checkbox"/> | <input checked="" type="checkbox"/> |                       |
| 11.3 Is there a system in place for independent review of study results?                                                                                  | <input checked="" type="checkbox"/> | <input type="checkbox"/> | <input type="checkbox"/>            | p. 17                 |

Comments:

| <b>Section 12: Limitations</b>                                                                                                                                                       | <b>Yes</b>                          | <b>No</b>                | <b>N/A</b>               | <b>Section Number</b> |
|--------------------------------------------------------------------------------------------------------------------------------------------------------------------------------------|-------------------------------------|--------------------------|--------------------------|-----------------------|
| 12.1 Does the protocol discuss the impact on the study results of:                                                                                                                   |                                     |                          |                          |                       |
| 12.1.1 Selection bias?                                                                                                                                                               | <input checked="" type="checkbox"/> | <input type="checkbox"/> | <input type="checkbox"/> | p. 18-19              |
| 12.1.2 Information bias?                                                                                                                                                             | <input checked="" type="checkbox"/> | <input type="checkbox"/> | <input type="checkbox"/> | p. 18-19              |
| 12.1.3 Residual/unmeasured confounding?<br>(e.g. anticipated direction and magnitude of such biases, validation sub-study, use of validation and external data, analytical methods). | <input checked="" type="checkbox"/> | <input type="checkbox"/> | <input type="checkbox"/> | p. 19                 |



| <b><u>Section 12: Limitations</u></b>                                                                                                                                                         | <b>Yes</b>                          | <b>No</b>                | <b>N/A</b>               | <b>Section Number</b> |
|-----------------------------------------------------------------------------------------------------------------------------------------------------------------------------------------------|-------------------------------------|--------------------------|--------------------------|-----------------------|
| 12.2 Does the protocol discuss study feasibility?<br>(e.g. study size, anticipated exposure uptake, duration of follow-up in a cohort study, patient recruitment, precision of the estimates) | <input checked="" type="checkbox"/> | <input type="checkbox"/> | <input type="checkbox"/> | p. 16                 |

Comments:

| <b><u>Section 13: Ethical/data protection issues</u></b>                               | <b>Yes</b>                          | <b>No</b>                | <b>N/A</b>                          | <b>Section Number</b> |
|----------------------------------------------------------------------------------------|-------------------------------------|--------------------------|-------------------------------------|-----------------------|
| 13.1 Have requirements of Ethics Committee/ Institutional Review Board been described? | <input checked="" type="checkbox"/> | <input type="checkbox"/> | <input type="checkbox"/>            | p. 17                 |
| 13.2 Has any outcome of an ethical review procedure been addressed?                    | <input type="checkbox"/>            | <input type="checkbox"/> | <input checked="" type="checkbox"/> |                       |
| 13.3 Have data protection requirements been described?                                 | <input checked="" type="checkbox"/> | <input type="checkbox"/> | <input type="checkbox"/>            | p. 17                 |

Comments:

| <b><u>Section 14: Amendments and deviations</u></b>                             | <b>Yes</b>               | <b>No</b>                | <b>N/A</b>                          | <b>Section Number</b> |
|---------------------------------------------------------------------------------|--------------------------|--------------------------|-------------------------------------|-----------------------|
| 14.1 Does the protocol include a section to document amendments and deviations? | <input type="checkbox"/> | <input type="checkbox"/> | <input checked="" type="checkbox"/> |                       |

Comments:

| <b><u>Section 15: Plans for communication of study results</u></b>                          | <b>Yes</b>                          | <b>No</b>                | <b>N/A</b>               | <b>Section Number</b> |
|---------------------------------------------------------------------------------------------|-------------------------------------|--------------------------|--------------------------|-----------------------|
| 15.1 Are plans described for communicating study results (e.g. to regulatory authorities)?  | <input checked="" type="checkbox"/> | <input type="checkbox"/> | <input type="checkbox"/> | p. 17                 |
| 15.2 Are plans described for disseminating study results externally, including publication? | <input checked="" type="checkbox"/> | <input type="checkbox"/> | <input type="checkbox"/> | p. 17                 |

Comments:

Name of the main author of the protocol: BERTHE Pauline

Date: 07/04/2022

Signature: 

**The RECORD statement – checklist of items, extended from the STROBE statement, that should be reported in observational studies using routinely collected health data.**

|                           | Item No. | STROBE items                                                                                                                                                                               | Location in manuscript where items are reported | RECORD items                                                                                                                                                                                                                                                                                                                                                                                                                                | Location in manuscript where items are reported |
|---------------------------|----------|--------------------------------------------------------------------------------------------------------------------------------------------------------------------------------------------|-------------------------------------------------|---------------------------------------------------------------------------------------------------------------------------------------------------------------------------------------------------------------------------------------------------------------------------------------------------------------------------------------------------------------------------------------------------------------------------------------------|-------------------------------------------------|
| <b>Title and abstract</b> |          |                                                                                                                                                                                            |                                                 |                                                                                                                                                                                                                                                                                                                                                                                                                                             |                                                 |
|                           | 1        | (a) Indicate the study's design with a commonly used term in the title or the abstract (b) Provide in the abstract an informative and balanced summary of what was done and what was found |                                                 | RECORD 1.1: The type of data used should be specified in the title or abstract. When possible, the name of the databases used should be included.<br><br>RECORD 1.2: If applicable, the geographic region and timeframe within which the study took place should be reported in the title or abstract.<br><br>RECORD 1.3: If linkage between databases was conducted for the study, this should be clearly stated in the title or abstract. | Pages 1 and 4                                   |
| <b>Introduction</b>       |          |                                                                                                                                                                                            |                                                 |                                                                                                                                                                                                                                                                                                                                                                                                                                             |                                                 |
| Background rationale      | 2        | Explain the scientific background and rationale for the investigation being reported                                                                                                       |                                                 |                                                                                                                                                                                                                                                                                                                                                                                                                                             | Pages 6, 7 and 8                                |
| Objectives                | 3        | State specific objectives, including any prespecified hypotheses                                                                                                                           |                                                 |                                                                                                                                                                                                                                                                                                                                                                                                                                             | Page 9                                          |
| <b>Methods</b>            |          |                                                                                                                                                                                            |                                                 |                                                                                                                                                                                                                                                                                                                                                                                                                                             |                                                 |
| Study Design              | 4        | Present key elements of study design early in the paper                                                                                                                                    |                                                 |                                                                                                                                                                                                                                                                                                                                                                                                                                             | Pages 9 and 10                                  |
| Setting                   | 5        | Describe the setting, locations, and relevant dates, including periods of recruitment, exposure, follow-up, and data collection                                                            |                                                 |                                                                                                                                                                                                                                                                                                                                                                                                                                             | Pages 10, 11 and 12                             |

|                                                                                                                                                                                                            |          |                                                                                                                                                                                                                                                                                                                                                                                                                                                                                                                                                                                                                                                                                                                        |  |                                                                                                                                                                                                                                                                                                                                                                                                                                                                                                                                                                                                                                                                                                      |                                            |
|------------------------------------------------------------------------------------------------------------------------------------------------------------------------------------------------------------|----------|------------------------------------------------------------------------------------------------------------------------------------------------------------------------------------------------------------------------------------------------------------------------------------------------------------------------------------------------------------------------------------------------------------------------------------------------------------------------------------------------------------------------------------------------------------------------------------------------------------------------------------------------------------------------------------------------------------------------|--|------------------------------------------------------------------------------------------------------------------------------------------------------------------------------------------------------------------------------------------------------------------------------------------------------------------------------------------------------------------------------------------------------------------------------------------------------------------------------------------------------------------------------------------------------------------------------------------------------------------------------------------------------------------------------------------------------|--------------------------------------------|
| <p>1<br/>2<br/>3<br/>4<br/>5<br/>6<br/>7<br/>8<br/>9<br/>10<br/>11<br/>12<br/>13<br/>14<br/>15<br/>16<br/>17<br/>18<br/>19<br/>20<br/>21<br/>22<br/>23<br/>24<br/>25<br/>26<br/>27</p> <p>Participants</p> | <p>6</p> | <p>(a) <i>Cohort study</i> - Give the eligibility criteria, and the sources and methods of selection of participants. Describe methods of follow-up<br/> <i>Case-control study</i> - Give the eligibility criteria, and the sources and methods of case ascertainment and control selection. Give the rationale for the choice of cases and controls<br/> <i>Cross-sectional study</i> - Give the eligibility criteria, and the sources and methods of selection of participants</p> <p>(b) <i>Cohort study</i> - For matched studies, give matching criteria and number of exposed and unexposed<br/> <i>Case-control study</i> - For matched studies, give matching criteria and the number of controls per case</p> |  | <p>RECORD 6.1: The methods of study population selection (such as codes or algorithms used to identify subjects) should be listed in detail. If this is not possible, an explanation should be provided.</p> <p>RECORD 6.2: Any validation studies of the codes or algorithms used to select the population should be referenced. If validation was conducted for this study and not published elsewhere, detailed methods and results should be provided.</p> <p>RECORD 6.3: If the study involved linkage of databases, consider use of a flow diagram or other graphical display to demonstrate the data linkage process, including the number of individuals with linked data at each stage.</p> | <p>Pages 10 and 11, and in table 2</p>     |
| <p>28<br/>29<br/>30<br/>31<br/>32<br/>33<br/>34</p> <p>Variables</p>                                                                                                                                       | <p>7</p> | <p>Clearly define all outcomes, exposures, predictors, potential confounders, and effect modifiers. Give diagnostic criteria, if applicable.</p>                                                                                                                                                                                                                                                                                                                                                                                                                                                                                                                                                                       |  | <p>RECORD 7.1: A complete list of codes and algorithms used to classify exposures, outcomes, confounders, and effect modifiers should be provided. If these cannot be reported, an explanation should be provided.</p>                                                                                                                                                                                                                                                                                                                                                                                                                                                                               | <p>Pages 10, 11, 12, 14 and in table 2</p> |
| <p>35<br/>36<br/>37<br/>38<br/>39<br/>40<br/>41<br/>42</p> <p>Data sources/<br/>measurement</p>                                                                                                            | <p>8</p> | <p>For each variable of interest, give sources of data and details of methods of assessment (measurement). Describe comparability of assessment methods if there is more than one group</p>                                                                                                                                                                                                                                                                                                                                                                                                                                                                                                                            |  |                                                                                                                                                                                                                                                                                                                                                                                                                                                                                                                                                                                                                                                                                                      | <p>Pages 10 to 14</p>                      |

|                                                                                                                                                    |                                  |    |                                                                                                                                                                                                                                                                                                                                                                                                                                                                                                                                                                      |                                                                                                                                                       |                      |
|----------------------------------------------------------------------------------------------------------------------------------------------------|----------------------------------|----|----------------------------------------------------------------------------------------------------------------------------------------------------------------------------------------------------------------------------------------------------------------------------------------------------------------------------------------------------------------------------------------------------------------------------------------------------------------------------------------------------------------------------------------------------------------------|-------------------------------------------------------------------------------------------------------------------------------------------------------|----------------------|
| 1<br>2<br>3<br>4                                                                                                                                   | Bias                             | 9  | Describe any efforts to address potential sources of bias                                                                                                                                                                                                                                                                                                                                                                                                                                                                                                            |                                                                                                                                                       | Pages 9, 10          |
| 5<br>6<br>7<br>8<br>9                                                                                                                              | Study size                       | 10 | Explain how the study size was arrived at                                                                                                                                                                                                                                                                                                                                                                                                                                                                                                                            |                                                                                                                                                       | Page 16              |
| 10<br>11<br>12<br>13<br>14<br>15<br>16<br>17<br>18<br>19<br>20<br>21<br>22<br>23<br>24<br>25<br>26<br>27<br>28<br>29<br>30<br>31<br>32<br>33<br>34 | Quantitative variables           | 11 | Explain how quantitative variables were handled in the analyses. If applicable, describe which groupings were chosen, and why                                                                                                                                                                                                                                                                                                                                                                                                                                        |                                                                                                                                                       | Pages 12, 13, and 14 |
| 35<br>36<br>37<br>38<br>39<br>40<br>41<br>42<br>43<br>44<br>45<br>46<br>47                                                                         | Statistical methods              | 12 | (a) Describe all statistical methods, including those used to control for confounding<br>(b) Describe any methods used to examine subgroups and interactions<br>(c) Explain how missing data were addressed<br>(d) <i>Cohort study</i> - If applicable, explain how loss to follow-up was addressed<br><i>Case-control study</i> - If applicable, explain how matching of cases and controls was addressed<br><i>Cross-sectional study</i> - If applicable, describe analytical methods taking account of sampling strategy<br>(e) Describe any sensitivity analyses |                                                                                                                                                       | Pages 12, 13 and 14  |
|                                                                                                                                                    | Data access and cleaning methods |    | ..                                                                                                                                                                                                                                                                                                                                                                                                                                                                                                                                                                   | RECORD 12.1: Authors should describe the extent to which the investigators had access to the database population used to create the study population. | Pages 10, 11 and 12  |

|                  |    |                                                                                                                                                                                                                                                                                                                                                 |  |                                                                                                                                                                                                                                                                                                                    |  |
|------------------|----|-------------------------------------------------------------------------------------------------------------------------------------------------------------------------------------------------------------------------------------------------------------------------------------------------------------------------------------------------|--|--------------------------------------------------------------------------------------------------------------------------------------------------------------------------------------------------------------------------------------------------------------------------------------------------------------------|--|
|                  |    |                                                                                                                                                                                                                                                                                                                                                 |  | RECORD 12.2: Authors should provide information on the data cleaning methods used in the study.                                                                                                                                                                                                                    |  |
| Linkage          |    | ..                                                                                                                                                                                                                                                                                                                                              |  | RECORD 12.3: State whether the study included person-level, institutional-level, or other data linkage across two or more databases. The methods of linkage and methods of linkage quality evaluation should be provided.                                                                                          |  |
| <b>Results</b>   |    |                                                                                                                                                                                                                                                                                                                                                 |  |                                                                                                                                                                                                                                                                                                                    |  |
| Participants     | 13 | (a) Report the numbers of individuals at each stage of the study ( <i>e.g.</i> , numbers potentially eligible, examined for eligibility, confirmed eligible, included in the study, completing follow-up, and analysed)<br>(b) Give reasons for non-participation at each stage.<br>(c) Consider use of a flow diagram                          |  | RECORD 13.1: Describe in detail the selection of the persons included in the study ( <i>i.e.</i> , study population selection) including filtering based on data quality, data availability and linkage. The selection of included persons can be described in the text and/or by means of the study flow diagram. |  |
| Descriptive data | 14 | (a) Give characteristics of study participants ( <i>e.g.</i> , demographic, clinical, social) and information on exposures and potential confounders<br>(b) Indicate the number of participants with missing data for each variable of interest<br>(c) <i>Cohort study</i> - summarise follow-up time ( <i>e.g.</i> , average and total amount) |  |                                                                                                                                                                                                                                                                                                                    |  |
| Outcome data     | 15 | <i>Cohort study</i> - Report numbers of outcome events or summary measures over time<br><i>Case-control study</i> - Report numbers in each exposure                                                                                                                                                                                             |  |                                                                                                                                                                                                                                                                                                                    |  |

|                   |    |                                                                                                                                                                                                                                                                                                                                                                                                                 |  |                                                                                                                                                                                                                                                                                                          |         |
|-------------------|----|-----------------------------------------------------------------------------------------------------------------------------------------------------------------------------------------------------------------------------------------------------------------------------------------------------------------------------------------------------------------------------------------------------------------|--|----------------------------------------------------------------------------------------------------------------------------------------------------------------------------------------------------------------------------------------------------------------------------------------------------------|---------|
|                   |    | category, or summary measures of exposure<br><i>Cross-sectional study</i> - Report numbers of outcome events or summary measures                                                                                                                                                                                                                                                                                |  |                                                                                                                                                                                                                                                                                                          |         |
| Main results      | 16 | (a) Give unadjusted estimates and, if applicable, confounder-adjusted estimates and their precision (e.g., 95% confidence interval). Make clear which confounders were adjusted for and why they were included<br>(b) Report category boundaries when continuous variables were categorized<br>(c) If relevant, consider translating estimates of relative risk into absolute risk for a meaningful time period |  |                                                                                                                                                                                                                                                                                                          |         |
| Other analyses    | 17 | Report other analyses done— e.g., analyses of subgroups and interactions, and sensitivity analyses                                                                                                                                                                                                                                                                                                              |  |                                                                                                                                                                                                                                                                                                          |         |
| <b>Discussion</b> |    |                                                                                                                                                                                                                                                                                                                                                                                                                 |  |                                                                                                                                                                                                                                                                                                          |         |
| Key results       | 18 | Summarise key results with reference to study objectives                                                                                                                                                                                                                                                                                                                                                        |  |                                                                                                                                                                                                                                                                                                          |         |
| Limitations       | 19 | Discuss limitations of the study, taking into account sources of potential bias or imprecision. Discuss both direction and magnitude of any potential bias                                                                                                                                                                                                                                                      |  | RECORD 19.1: Discuss the implications of using data that were not created or collected to answer the specific research question(s). Include discussion of misclassification bias, unmeasured confounding, missing data, and changing eligibility over time, as they pertain to the study being reported. | Page 19 |
| Interpretation    | 20 | Give a cautious overall interpretation of results considering objectives,                                                                                                                                                                                                                                                                                                                                       |  |                                                                                                                                                                                                                                                                                                          |         |

|                                                           |    |                                                                                                                                                               |  |                                                                                                                                                          |         |
|-----------------------------------------------------------|----|---------------------------------------------------------------------------------------------------------------------------------------------------------------|--|----------------------------------------------------------------------------------------------------------------------------------------------------------|---------|
|                                                           |    | limitations, multiplicity of analyses, results from similar studies, and other relevant evidence                                                              |  |                                                                                                                                                          |         |
| Generalisability                                          | 21 | Discuss the generalisability (external validity) of the study results                                                                                         |  |                                                                                                                                                          |         |
| <b>Other Information</b>                                  |    |                                                                                                                                                               |  |                                                                                                                                                          |         |
| Funding                                                   | 22 | Give the source of funding and the role of the funders for the present study and, if applicable, for the original study on which the present article is based |  |                                                                                                                                                          | Page 20 |
| Accessibility of protocol, raw data, and programming code |    | ..                                                                                                                                                            |  | RECORD 22.1: Authors should provide information on how to access any supplemental information such as the study protocol, raw data, or programming code. |         |

\*Reference: Benchimol EI, Smeeth L, Guttman A, Harron K, Moher D, Petersen I, Sørensen HT, von Elm E, Langan SM, the RECORD Working Committee. The REporting of studies Conducted using Observational Routinely-collected health Data (RECORD) Statement. *PLoS Medicine* 2015; in press.

\*Checklist is protected under Creative Commons Attribution ([CC BY](https://creativecommons.org/licenses/by/4.0/)) license.
